# Supplementary material for: ESIPT fluorescence turn-on sensors for detection of short chain inorganic polyphosphate in water
Source: PubMed Central journal article supplement (PMC11665774; doi:10.1039/d4ob01926a), 2024-12-18

## ESIPT fluorescence turn-on sensors for detection of short chain inorganic polyphosphate in water

Subhra Kanti Roy, Sandra Moser, Tobias Dürr-Mayer, Rahel Hinkelmann, and Henning J. Jessen

### Table of Content:

|                                                                                                                    |    |
|--------------------------------------------------------------------------------------------------------------------|----|
| Abbreviations                                                                                                      | 2  |
| 1. General experimental remarks                                                                                    | 3  |
| 2. Spectroscopic studies: PolyP <sub>8</sub> sensing                                                               |    |
| 2.1 Absorption measurement                                                                                         | 4  |
| 2.2 Fluorescence measurement                                                                                       | 4  |
| 2.3 Fluorescence quantum yield                                                                                     | 4  |
| 3. Emission measurement with different phosphate analytes on plate reader                                          | 6  |
| 4. Reversibility experiment                                                                                        | 6  |
| 5. Polyphosphate digestion by exopolyphosphatase enzyme reaction monitoring                                        | 6  |
| 6. Supporting data for compound <b>5</b>                                                                           |    |
| 6.1 Absorption titration spectra of <b>5</b> with Cu <sup>2+</sup> and excitation spectra of <b>4</b> and <b>5</b> | 7  |
| 6.2 Fluorescence titration spectra of <b>5</b> with Cu <sup>2+</sup>                                               | 7  |
| 7. Change of emission from fluorescence titration of <b>7</b> with polyP <sub>8</sub>                              | 8  |
| 8. Change of emission of <b>6</b> in presence of polyP <sub>8</sub> with time                                      | 8  |
| 9. Limit of Detection                                                                                              | 9  |
| 10. HRMS spectra of <b>6</b> and <b>7</b>                                                                          | 10 |
| 11. Synthesis of the ESIPT probes                                                                                  | 11 |
| 12. Synthesis of the polyphosphates                                                                                | 13 |
| 13. Crystallographic data                                                                                          | 16 |
| 14. Supporting references                                                                                          | 54 |
| 15. NMR and HRMS spectra                                                                                           | 55 |

## Abbreviations:

|                |                                                     |
|----------------|-----------------------------------------------------|
| Å              | Angstrom                                            |
| aq.            | aqueous                                             |
| <i>c</i> -PyPA | <i>cyclic</i> pyrophosphoryl phosphoramidite        |
| DBU            | 1,8-diazabicyclo[5.4.0]undec-7-ene                  |
| DMSO           | dimethylsulfoxide                                   |
| DCM            | dichloromethane                                     |
| EDTA           | ethylenediaminetetraacetic acid                     |
| equiv.         | equivalent                                          |
| EtOH           | ethanol                                             |
| ESI            | electrospray ionization                             |
| ETT            | 5-(ethylthio)-1 <i>H</i> -tetrazole                 |
| Fm             | (9 <i>H</i> -fluoren-9-yl)methyl                    |
| HEPES          | 4-(2-hydroxyethyl)-1-piperazineethanesulfonic acid  |
| HRMS           | high resolution mass spectrometry                   |
| nm             | nanometre                                           |
| m              | multiplet (NMR), milli                              |
| M              | molar                                               |
| μM             | micromolar                                          |
| <i>m</i> CPBA  | <i>meta</i> -chloroperoxybenzoic acid               |
| MeCN           | acetonitrile                                        |
| NMR            | nuclear magnetic resonance                          |
| Pi             | phosphate                                           |
| PPi            | pyrophosphate                                       |
| polyP          | polyphosphate(s)                                    |
| ppm            | parts per million                                   |
| rpm            | revolutions per minute                              |
| RP-MPLC        | reverse phase medium pressure liquid chromatography |
| TBA            | tetrabutylammonium                                  |
| THF            | tetrahydrofuran                                     |

## 1. General experimental remarks

**Reactions** were carried out using glassware magnetically stirred, unless noted otherwise. Air- and moisture-sensitive liquids and solutions were transferred via syringe. Reagents were purchased from commercial suppliers (Sigma Aldrich, Acros, TCI, Roth, ChemPur, Alfa Aesar, VWR/Merck) and used as received unless noted otherwise.

**Solvents** were obtained in analytical grade and used as received for extractions, precipitation and solid washing.

**Dry solvents** for reactions were purchased in a dry form from Sigma and stored over molecular sieves as well as under the atmosphere of dry N<sub>2</sub>.

**Deuterated solvents** for NMR and reactions were obtained from Armar Chemicals, Switzerland and Euriso-top, Germany, in the indicated purity grade and used as received for NMR spectroscopy.

**Phosphates:** Pi, P<sub>2</sub>O<sub>5</sub>, P<sub>3</sub>, trimetaphosphate were commercially bought from Sigma-Aldrich and Acros. PolyP<sub>14</sub>, polyP<sub>60</sub>, polyP<sub>100</sub> and polyP<sub>130</sub> were obtained from RegeneTiss Inc. polyP<sub>22</sub>, polyP<sub>45</sub>, were obtained from Aldrich (polyP glass). PolyP<sub>700</sub> was bought from kerafast.

**Lyophilizations** were done with Christ Freeze Dryer Alpha 1-4 LDplus and Christ Freeze Dryer Alpha 1-2 LDplus.

**Preparative RP-MPLC** was performed using an automated Interchim® - system. The C18AQ-solid phase was purchased from Interchim.

**<sup>1</sup>H-NMR** spectra were recorded on Bruker 300 MHz spectrometers, Bruker 400 MHz (with cryoprobe) and Bruker 500 MHz spectrometers in the indicated deuterated solvent. Data are reported as follows: chemical shift (δ, ppm), multiplicity (s, singlet; d, doublet; t, triplet; q, quartet; m, multiplet; br. s, broad signal), coupling constant(s) (J, Hz), integration. All signals were referenced to the internal solvent signal as standard (D<sub>2</sub>O: δ= 4.79, DMSO-d<sub>6</sub>: δ= 2.50, CDCl<sub>3</sub>: δ= 7.26 ppm).

**<sup>13</sup>C{<sup>1</sup>H}-NMR** spectra were recorded with <sup>1</sup>H-decoupling on Bruker 126 MHz, Bruker 101 MHz (with cryoprobe) spectrometers at 298K in the indicated deuterated solvent. If possible, signals were referred to the internal solvent signal as standard (DMSO-d<sub>6</sub>: δ= 39.52, CDCl<sub>3</sub>: δ = 77.23 ppm).

**X-ray crystallography:** Crystals were mounted on a MiTeGen micromount with perfluoroether oil. Data were collected from a shock-cooled single crystal at 100(2) K on a Bruker D8 VENTURE dual

wavelength Mo/Cu three-circle diffractometer with a microfocus sealed X-ray tube using a mirror optics as monochromator and a Bruker PHOTON III detector. The diffractometer was equipped with an Oxford Cryostream 800 low temperature device and used MoK $\alpha$  radiation ( $\lambda = 0.71073 \text{ \AA}$ ). All data were integrated with SAINT and a multi-scan absorption correction using SADABS was applied. The structure was solved by direct methods using SHELXT and refined by full-matrix least-squares methods against F2 by SHELXL-2019/2. All non-hydrogen atoms were refined with anisotropic displacement parameters. All C-bound hydrogen atoms were refined with isotropic displacement parameters. Some of their coordinates were refined freely and some on calculated positions using a riding model with their Uiso values constrained to 1.5 times the Ueq of their pivot atoms for terminal sp<sup>3</sup> carbon atoms and 1.2 times for all other carbon atoms.

**UV/Vis-Absorption** spectra were recorded on UV Vis Spectrometer Shimadzu 1900i.

**Fluorescence Spectra** were recorded on a JASCO FP-8200 Spectrofluorometer or on a Tecan Spark 10M Microplate Topreader using 96-well plates (Thermo Fisher Scientific-Nunclon 96 Flat Black).

## **2. Spectroscopic studies: PolyP<sub>8</sub> sensing:**

**2.1 Absorption measurement experiments.** All absorption measurements were performed from a 100  $\mu\text{M}$  stock solution of the probes (final concentration 5  $\mu\text{M}$  in 10 mM HEPES buffer; pH =7.4) with addition of sodium salt of the polyP<sub>8</sub> from a stock solution of 2 mM (aq.). Total volume of the measurement solutions were 2 ml. The absorptions were recorded after 2 minutes of the addition of the analytes into the solution of the probes.

**2.2 Fluorescence measurement experiments:** All fluorescence measurements were performed from a 100  $\mu\text{M}$  stock solution of the probes (final concentration 2.5/5  $\mu\text{M}$  in 10 mM HEPES buffer, pH=7.4) with addition of sodium salt of the polyP<sub>8</sub> a stock solution of 2 mM (aq.). Total volume of the measurement solutions were 1.5 ml. The fluorescence were recorded after 2 minutes of the addition of the analytes into the solution of the probes.

### **2.3 Fluorescence quantum yield:**

Fluorescence Quantum Yield was measured on JASCO Spectrofluorometer FP-8300 using integration shepre ILF-835 with liquid sample cell (1 mm thickness, 1 x 10 x 25 mm). In this program, the quantum yield is determined using the excitation light spectrum (incident light spectrum) and the

sample emission spectrum measured under identical conditions. (From [Quantum Yield Calculation] Program Software Manual).

$$\text{Internal quantum efficiency} = \frac{\text{The number of photons in emission}}{\text{The number of photons in the excitation light absorbed by the sample}}$$

To calculate the fluorescence quantum efficiency of a compound three emission spectra were measured. (1) Incident light spectrum, i.e. emission spectrum by excitation light irradiated to the inner surface of the integrating sphere without the sample, (2) Direct spectra i.e. sample spectrum, emission spectrum by excitation light directly irradiate to the sample. The spectrum contains both excitation light and emission light. (3) Indirectly excited sample spectrum, i.e. emission spectrum by excitation light irradiated to the inner surface of the integrating sphere. The sample is indirectly excited by scattered light. This spectrum is used for indirect excitation correction.

These three spectra were utilized in the Quantum Yield Calculation Program provided by the instrument's software.

**Table S1:** Fluorescence quantum yield.

| Compound | Absorbance (%) | Ext. Quantum Efficiency (%) | Int. Quantum Efficiency (%) |
|----------|----------------|-----------------------------|-----------------------------|
| 4        | 70.052         | 23.198                      | 33.116                      |
| 5        | 35.226         | 5.919                       | 16.804                      |

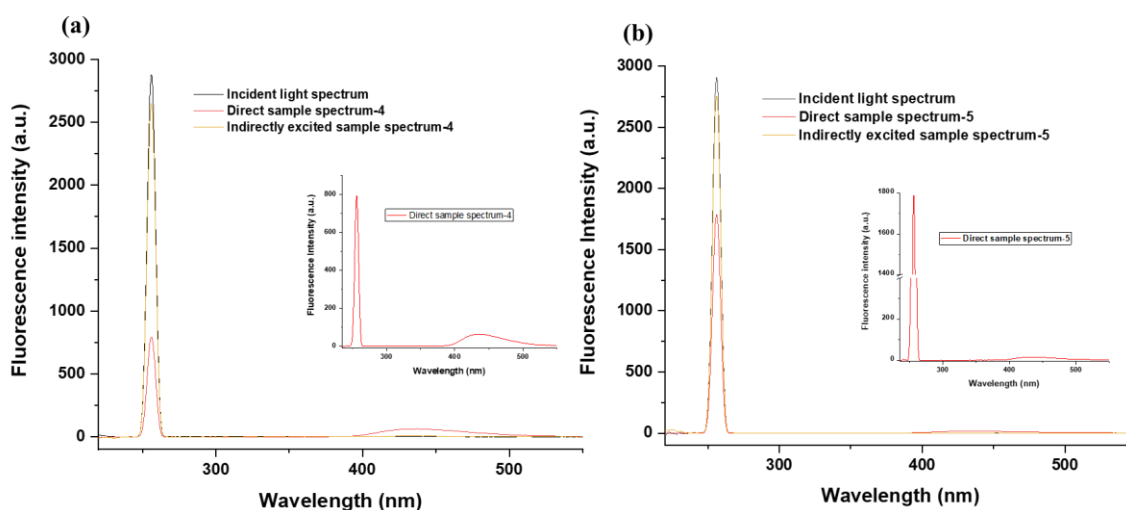

**Figure S1:** Emission spectra of (a) **4** and (b) **5** with Incident light spectrum, Direct sample spectrum and Indirectly excited sample spectrum. Measurement range 220-700 nm, Ex wavelength 254 nm and 250 nm for **4** and **5** respectively.

**3. Emission measurement with different phosphate analytes on a plate reader:** Emission intensity of the probes with different analytes (from a stock solution of 2 mM in water) were recorded in 10 mM HEPES buffer solution at pH 7.4 on Thermo Scientific™ 96-well plates, in triplicates, with a total volume of 150  $\mu$ L. The emission were recorded after 2 minutes of the addition of the analytes to the solution of the probes.

**4. Reversibility experiment:** Cycle 1 is the initial fluorescence of **4** (5  $\mu$ M, in 10 mM HEPES buffer, at pH 7.4). Reversibility has been accomplished by adjustment of the alternative addition Cu (II) and polyP8 in different portions to the solution of **4** (5  $\mu$ M, in 10 mM HEPES buffer, at pH 7.4) as depicted below. The emission were recorded after 2 minutes of the addition of the Cu<sup>2+</sup>/polyP<sub>8</sub> to the solution of the probes.

| Number of cycle | Equivalent                    |
|-----------------|-------------------------------|
| 1               | -                             |
| 2               | 0.5 equiv. Cu <sup>2+</sup>   |
| 3               | 1 equiv. polyP <sub>8</sub>   |
| 4               | 1 equiv. Cu <sup>2+</sup>     |
| 5               | 1.5 equiv. polyP <sub>8</sub> |
| 6               | 2.5 equiv. Cu <sup>2+</sup>   |
| 7               | 2.5 equiv. polyP <sub>8</sub> |
| 8               | 4 equiv. Cu <sup>2+</sup>     |
| 9               | 4 equiv. polyP <sub>8</sub>   |
| 10              | 4 equiv. Cu <sup>2+</sup>     |

**5. Polyphosphate digestion by exopolyphosphatase enzyme reaction monitoring:**

5.5  $\mu$ L of 2.9 mg/ml Exopolyphosphatase in buffer solution of 40 mM Tris-acetate, 10 mM Mg(OAc)<sub>2</sub>, 30 mM NH<sub>4</sub>OAc, 0.2 mM EDTA, at pH 8 was added to the 50  $\mu$ L different polyphosphate solutions in miliQ water (2 mM of polyP<sub>8</sub>, 1 mg/mL of polyP<sub>22</sub>, 4 mM of polyP<sub>60</sub> and 10 mM of polyP<sub>130</sub> were used for digestion). The solution was incubated for 21 h at 37 °C using a shaker at 600 rpm. The reaction mixture was quenched by freezing the solution with liquid nitrogen followed by centrifugation at 4 °C for 5 minutes with a speed of 13500 g.

Total well volume of all emission measurements were 75  $\mu$ L. For polyP<sub>8</sub>-PPX and polyP<sub>22</sub>-PPX 10  $\mu$ L, and for polyP<sub>60</sub>-PPX and polyP<sub>130</sub>-PPX reaction 20  $\mu$ L reaction mixture were added into probe

**6** ( $2.5 \mu\text{M}$ ,  $10 \text{ mM}$  HEPES buffer, at  $\text{pH } 7.4$ ). The consequent fluorescence intensities at  $434 \text{ nm}$  were measured as the mean of three replicates on a black 96 well- plate after 2 minutes the additions.

### 6.1 Absorption titration spectra of **5** with $\text{Cu}^{2+}$ and excitation spectra of **4** and **5**:

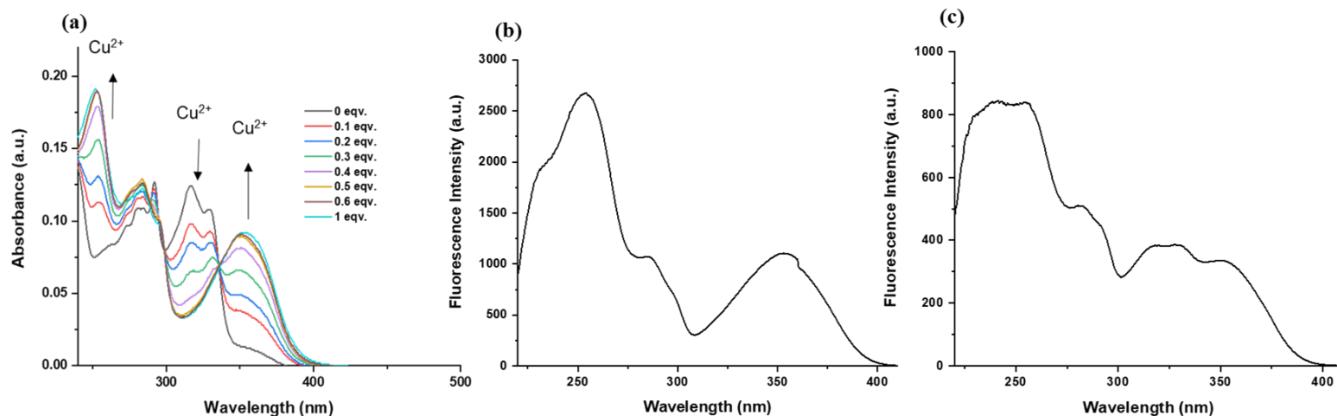

**Figure S2:** (a) Absorption titration spectra of **5** ( $10 \mu\text{M}$ ) in HEPES-buffer ( $10 \text{ mM}$ ,  $\text{pH} = 7.4$ ) in the presence of increasing concentrations of  $\text{Cu}^{2+}$  (0–1 equiv.). Excitation spectra of (b) **4** ( $2.5 \mu\text{M}$ ) and (c) **5** ( $5 \mu\text{M}$ ) in HEPES buffer ( $10 \text{ mM}$ ,  $\text{pH} = 7.4$ ).

### 6.2 Fluorescence titration spectra of **5** with $\text{Cu}^{2+}$ :

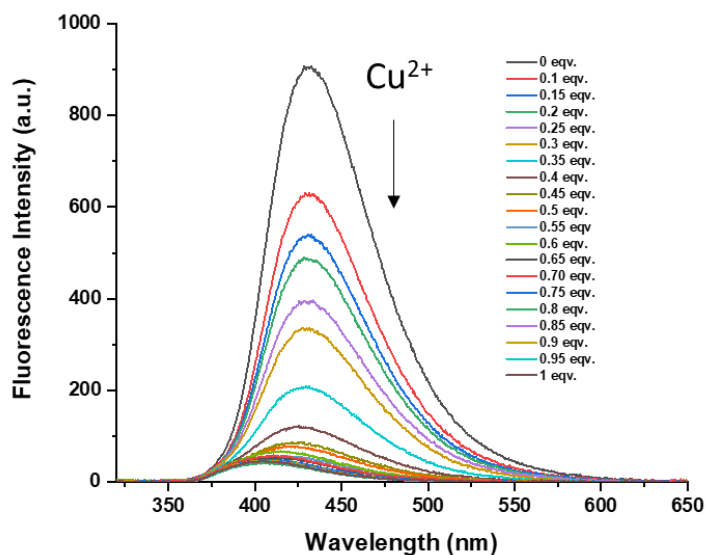

**Figure S3:** Fluorescence titration spectra of **5** ( $5 \mu\text{M}$ ) in HEPES-buffer ( $10 \text{ mM}$ ,  $\text{pH} = 7.4$ ) in the presence of increasing concentrations of  $\text{Cu}^{2+}$  (0–1.2 equiv.). Excitation wavelength=  $250 \text{ nm}$ .

### 7. Change of emission from fluorescence titration of **7** with polyP<sub>8</sub>:

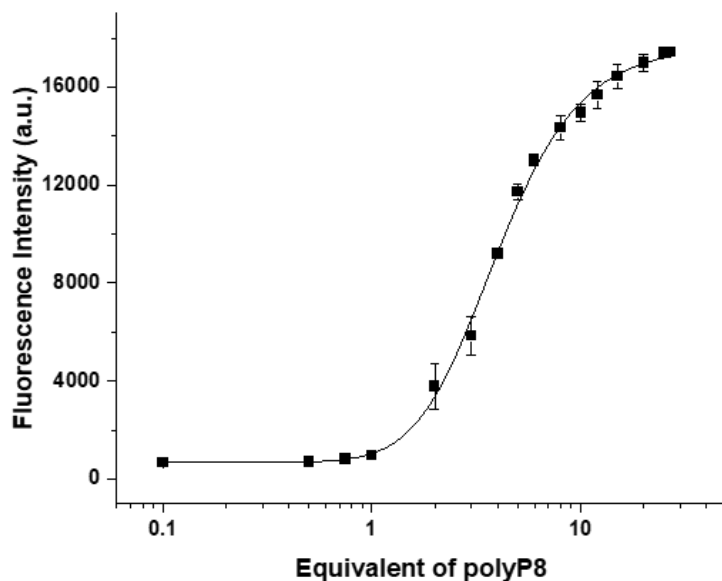

**Figure S4:** Change of emission intensity of 5  $\mu\text{M}$  of **7** (10 mM HEPES-buffer, pH= 7.4) at 430 nm with increasing polyP<sub>8</sub> concentration. Excitation wavelength= 250 nm. Number of replicates is three.

### 8. Change of emission of **6** in presence of polyP<sub>8</sub> with time:

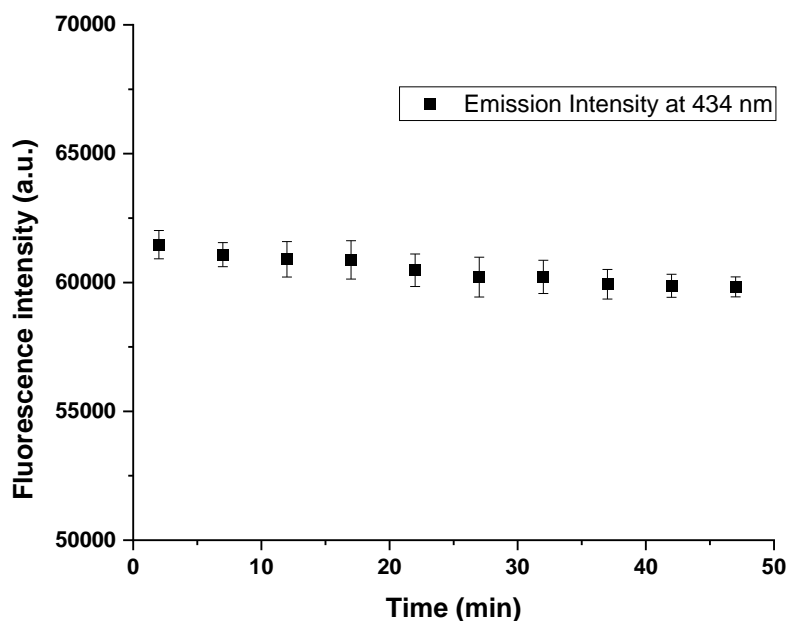

**Figure S5:** Change of emission intensity of 2.5  $\mu\text{M}$  of **6** (10 mM HEPES-buffer, pH= 7.4) at 434 nm in presence of 10 equiv. of polyP<sub>8</sub> with time. Excitation wavelength= 254 nm. Number of replicates is three.



**9. Limit of Detection:** The detection limit (LOD) was determined from the fluorescence titration data based on a reported method.<sup>1</sup> The fluorescence emission of probes were measured in a triplicate and the standard deviation of blank measurement was calculated. The emission intensity data at 434 nm for **6** and 430 nm for **7** were plotted as concentration of polyP8 to get the slope. The LODs were calculated with the following equation:

$$\text{Limit of detection} = 3\sigma/K$$

$\sigma$  = standard deviation of blank measurement, and  $K$  = slope between the fluorescence and polyP8 concentration.

LOD of polyP<sub>8</sub> with **6** = 97 nM; LOD of polyP<sub>8</sub> with **7** = 110 nM.

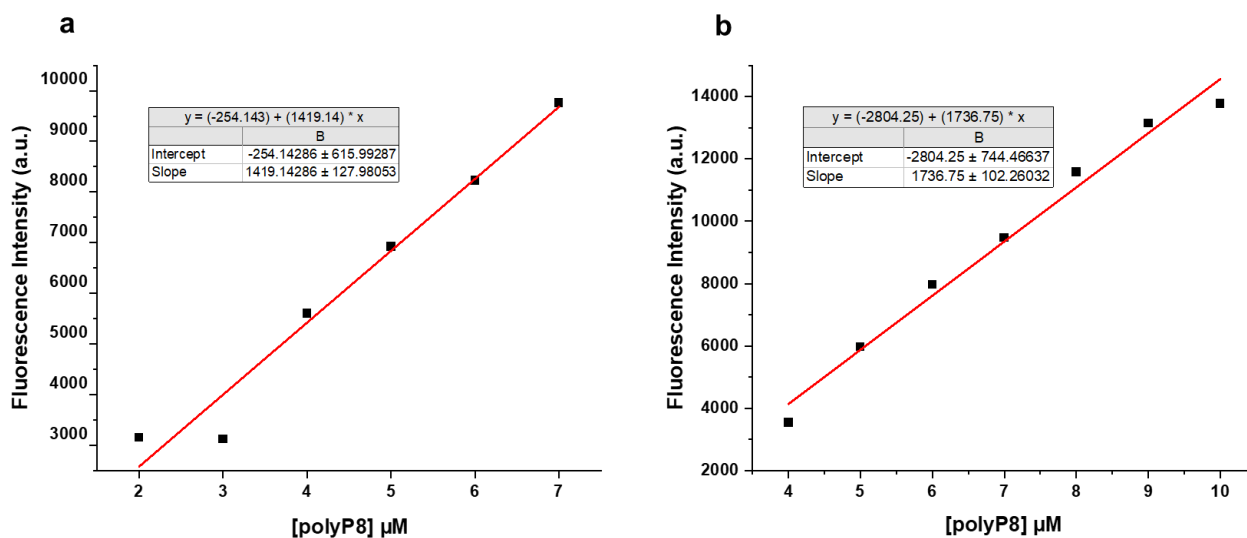

**Figure S6:** Emission intensity of (a) 2.5  $\mu\text{M}$  **6** at 434 nm ( $E_x = 254$  nm) and (b) 5  $\mu\text{M}$  **7** at 430 nm ( $E_x = 250$  nm) in 10 mM HEPES-buffer, pH = 7.4 with polyP<sub>8</sub> concentration.

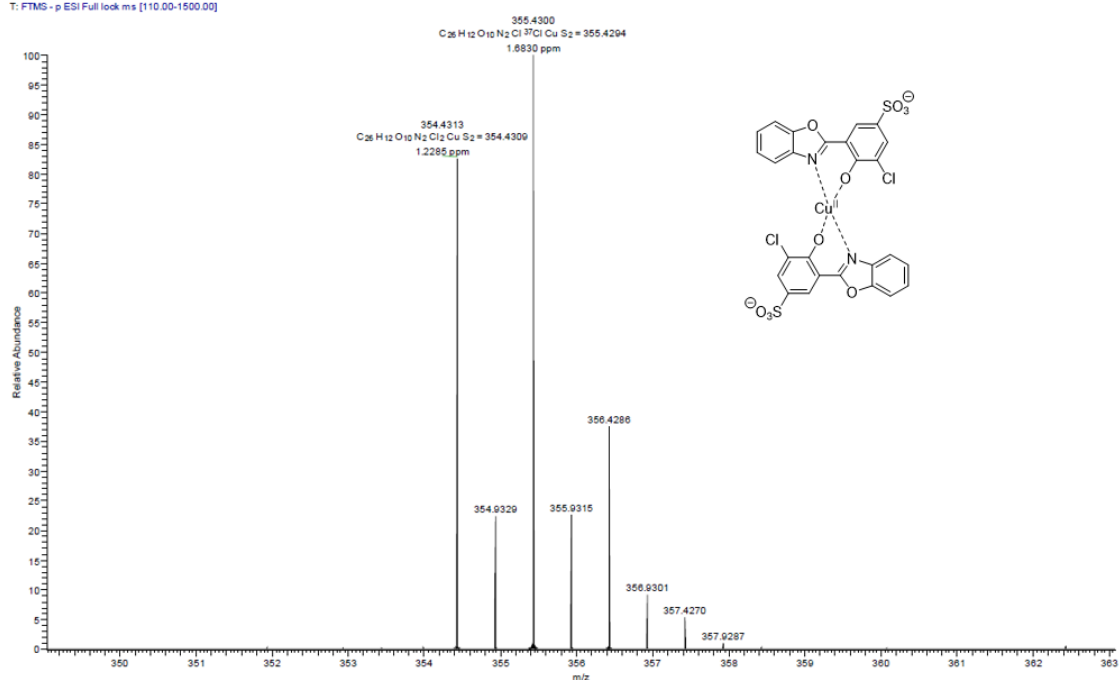

**Figure S7:** HRMS spectrum of **6**. HRMS (ESI) exact mass calculated for  $C_{26}H_{12}Cl_2CuN_2O_{10}S_2^{-}$  ( $[M-Na]^{-}$ ): 354.4309; Found: 354.4313.

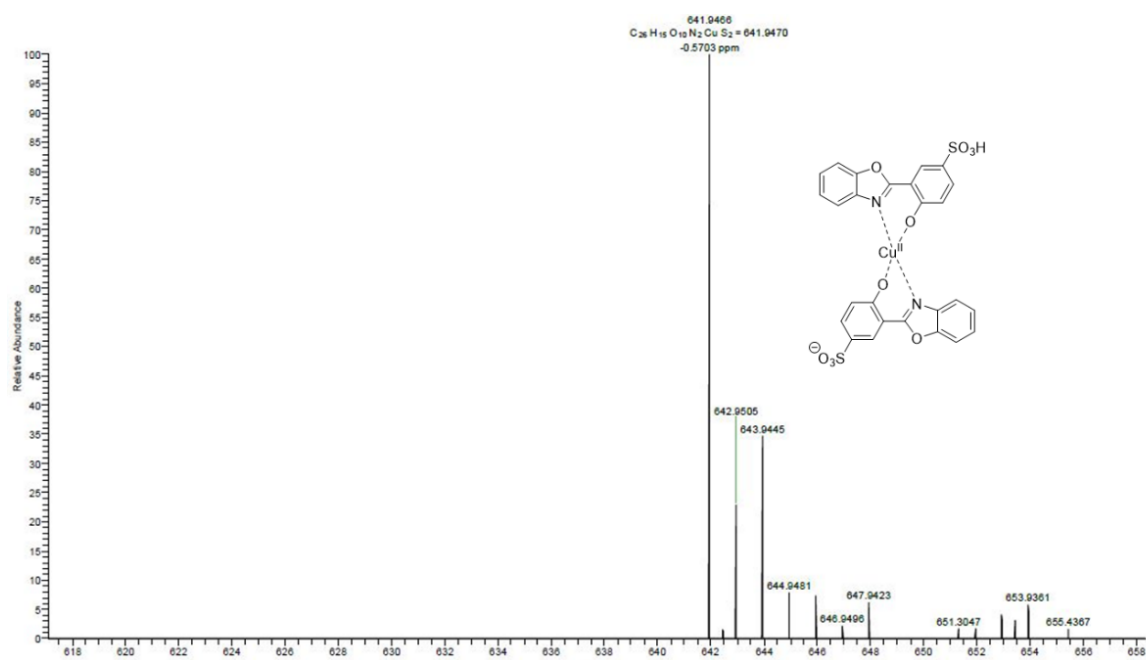

**Figure S8:** HRMS spectrum of **7**. HRMS (ESI) exact mass calculated for  $C_{26}H_{15}CuN_2O_{10}S^{-}$  ( $[M+H-Na]^{-}$ ): 641.9470; Found: 641.9466.

## 11. Synthesis of the ESIPT probes 6 and 7:

**2-chloro-6-((phenylimino)methyl)phenol (1):** A solution of aniline (0.16 mL, 1.92 mmol) in

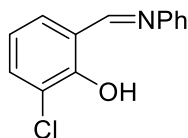

methanol (1 ml) was added to a solution of 3-chloro-salicylaldehyde (0.3 g, 1.92 mmol) in methanol (7.5 mL) and the reaction mixture was refluxed for 4 h. The reaction mixture was allowed to cool to room temperature and the solvent was

evaporated under vacuum to obtain brown gummy residue which became solid after 10-15 min at room temperature. The residue was washed with cyclohexane and dried under vacuum to get **1** as orange solid (0.44 g, 1.9 mmol, 99%) which was directly used for the next step without any purification. **<sup>1</sup>H-NMR** (300 MHz, CDCl<sub>3</sub>) δ= 8.62 (s, 1H), 7.48 – 7.42 (m, 3H), 7.35 – 7.29 (m, 4H), 6.89 (t, J = 7.8 Hz, 1H) ppm. **<sup>13</sup>C-NMR** (101 MHz, CDCl<sub>3</sub>) δ= 161.8, 157.4, 147.6, 133.4, 130.8, 129.8, 127.7, 122.1, 121.4, 120.2, 119.4 ppm. **HRMS** (ESI) exact mass calculated for C<sub>13</sub>H<sub>11</sub>ClNO ([M+H]<sup>+</sup>): 232.0524; Found: 232.0522.

**Sodium 3-chloro-5-formyl-4-hydroxybenzenesulfonate (3):** Concentrated sulphuric acid (5 mL)

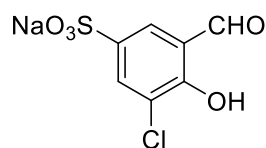

(95 wt %, d = 1.84 g/mL) was added slowly to the imine (0.44 g, 1.9 mmol) and the mixture was heated to 105 °C with a reflux condenser for 2.5 h. The reaction mixture was cooled and the solution was added slowly into a beaker containing ice water. Precipitation was observed after keeping the solution in

an ice bath for 30-45 minutes. The brownish black precipitate was collected by filtration and dried under vacuum to get **2** (0.5 g, 1.6 mmol, 84%) as a brown solid which was used for the next step without any purification. *N*-Phenyl-5-sulfonato-salicylalimine **2** was dissolved in H<sub>2</sub>O (6 mL) and Na<sub>2</sub>CO<sub>3</sub> (0.2 g, 1.92 mmol) was added slowly to the solution. The reaction mixture was heated vigorously in an open flask for 2.5 h (during the reaction time the water was replenished if required). The reaction mixture was cooled and kept in an ice bath. Glacial acetic acid (2 ml) was added to the cooled solution and afterwards EtOH (2 ml) was added to the solution. The solution was kept in an ice bath for several hours to obtain a yellow precipitation, which was filtered and dried under vacuum. The yellow solid was finally purified by RP-MPLC (column: interchim® PF-30C18AQ, F0040; λ = 254 nm; with 1-10 % acetonitrile in water, flow rate 26 mL/min) to obtain **3** as a light yellow solid (0.24 g, 0.93 mmol, 58%). **<sup>1</sup>H-NMR** (400 MHz, D<sub>2</sub>O) δ= 10.05 (s, 1H), 7.83 – 7.80 (m, 2H) ppm. **<sup>13</sup>C-NMR** (101 MHz, D<sub>2</sub>O) δ= 191.7, 168.7, 129.8, 126.1, 124.1, 123.4, 121.7 ppm. **HRMS** (ESI) exact mass calculated for C<sub>7</sub>H<sub>4</sub>ClO<sub>5</sub>S<sup>-</sup> ([M-Na]<sup>-</sup>): 234.9473; Found: 234.9475.

**Sodium 3-(benzo[d]oxazol-2-yl)-5-chloro-4-hydroxybenzenesulfonate (4):** Sodium 3-chloro-5-

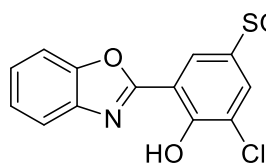

formyl-4-hydroxybenzenesulfonate **3** (0.19 g, 0.73 mmol) was dissolved in MeOH (8 ml) and 2-aminophenol (80 mg, 0.74 mmol) was added to the solution. The mixture was refluxed for 3 h and completion of the reaction was monitored by TLC. The reaction mixture was allowed to cool to room temperature and the solvent was evaporated to dryness under reduced pressure to get the intermediate imine as a red solid residue. The solid imine was dissolved in MeOH (8 ml) and stirred with  $\text{PhI}(\text{OAc})_2$  at room temperature overnight. The solvent was evaporated under vacuum to obtain a dark red solid residue which was purified by RP-MPLC (column: interchim® PF-30C18AQ, F0025;  $\lambda = 254$  nm; with 1-10 % acetonitrile in water, flow rate 15 mL/min) to afford analytically pure **4** as a brown red solid (98 mg, 0.3 mmol 41%).  $^1\text{H-NMR}$  (400 MHz,  $\text{DMSO-}d_6$ )  $\delta = 11.99$  (brs, 1H), 8.24 (d,  $J = 2.0$  Hz, 1H), 7.93 - 7.90 (m, 2H), 7.80 (d,  $J = 2.0$  Hz, 1H), 7.56 - 7.48 (m, 2H) ppm.  $^{13}\text{C-NMR}$  (101 MHz,  $\text{DMSO}$ )  $\delta = 161.4, 153.3, 148.9, 141.1, 138.9, 130.7, 126.4, 125.6, 123.1, 120.3, 119.4, 111.4, 110.7$  ppm. **HRMS** (ESI) exact mass calculated for  $\text{C}_{13}\text{H}_7\text{ClNO}_5\text{S}^-$  ( $[\text{M-Na}]^-$ ): 323.9739; Found: 323.9740.

**Sodium 3-(benzo[d]oxazol-2-yl)-4-hydroxybenzenesulfonate (5):** Concentrated sulphuric acid (6

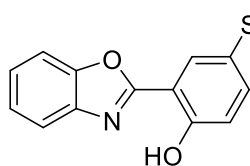

mL) (95 wt %,  $d = 1.84$  g/mL) was added slowly into the 2-hydroxyphenyl-benzoxazole (0.5 g, 2.36 mmol) and the mixture was heated at 105 °C with a reflux condenser for 2.5 h. The solution was cooled and added slowly into beaker containing ice water. Precipitation was observed after keeping the solution on ice bath for 30-45 minutes. The brown precipitate was collected by filtration and dried under vacuum to get **5** (0.68 g, 2.35 mmol) as a brown solid, which was dissolved in  $\text{H}_2\text{O}$  (10 mL) and  $\text{Na}_2\text{CO}_3$  (0.3 g, 2.8 mmol) was added slowly to the solution. The reaction mixture was heated vigorously in an open flask for 2.5 h (During the reaction time the water was replenished if required). The reaction mixture was cooled and kept in an ice bath. Glacial acetic acid (6 mL) was added to the cooled solution and afterwards EtOH (2 mL) was added to the solution. The solution was kept in an ice bath for several hours to obtain a light yellow precipitate, which was filtered and dried under vacuum. The yellow solid was finally purified by RP-MPLC (column: interchim® PF-30C18AQ, F0040;  $\lambda = 254$  nm; with 1-15 % acetonitrile in water, flow rate 26 mL/min) to obtain **5** as a colorless solid (0.38 g, 1.2 mmol, 52%).  $^1\text{H-NMR}$  (400 MHz,  $\text{DMSO-}d_6$ )  $\delta = 11.24$  (s, 1H), 8.29 (d,  $J = 2.4$  Hz, 1H), 7.90 - 7.85 (m, 2H), 7.72 (dd,  $J = 8.8, 2.4$  Hz, 1H), 7.51 - 7.45 (m, 2H), 7.08 (d,  $J = 8.4$  Hz, 1H) ppm.  $^{13}\text{C-NMR}$  (101 MHz,  $\text{DMSO}$ )  $\delta = 162.1, 157.6, 148.9, 140.6, 139.5, 131.3, 125.9, 125.3, 124.9, 119.2, 116.5, 111.1, 109.1$  ppm. **HRMS** (ESI) exact mass calculated for  $\text{C}_{13}\text{H}_8\text{NO}_5\text{S}$  ( $[\text{M-Na}]^-$ ): 290.0129; Found: 290.0126.

### Synthesis of 3-(benzo[d]oxazol-2-yl)-5-chloro-4-hydroxybenzenesulfonate Cu (II) complex (6):

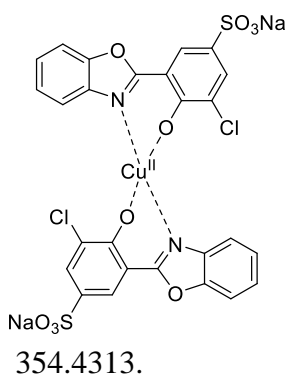

**4** (30 mg, 0.09 mmol) was suspended in dry THF (1.5 mL) and an aqueous solution of  $\text{CuCl}_2$  (6 mg in 1.5 mL  $\text{H}_2\text{O}$ ) solution was added to the suspension. The reaction mixture was stirred at room temperature for 4 h. The suspension was filtered and the solid was washed with THF to obtain the complex **6** as a brown green solid (22 mg, 0.028 mmol, 61%). **HRMS** (ESI) exact mass calculated for  $\text{C}_{26}\text{H}_{12}\text{Cl}_2\text{CuN}_2\text{O}_{10}\text{S}_2^{2-}$  ( $[\text{M}-\text{Na}]^{2-}$ ): 354.4309; Found: 354.4313.

### Synthesis of 3-(benzo[d]oxazol-2-yl)-4-hydroxybenzenesulfonate Cu (II) complex (7):

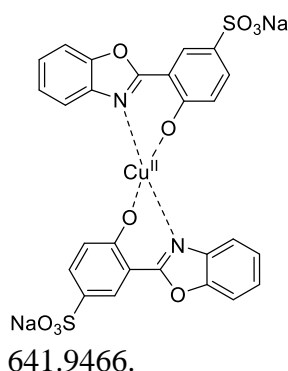

**5** (44 mg, 0.14 mmol) was suspended in dry THF (2 mL) and an aqueous solution of  $\text{CuCl}_2$  (9.4 mg in 2 mL  $\text{H}_2\text{O}$ ) solution was added to the suspension. The reaction mixture was stirred at room temperature for 4 h. The suspension was filtered and the solid was washed with THF to obtain the complex **7** as a light green solid (24 mg, 0.32 mmol, 45%). **HRMS** (ESI) exact mass calculated for  $\text{C}_{26}\text{H}_{15}\text{CuN}_2\text{O}_{10}\text{S}^-$  ( $[\text{M}+\text{H}-\text{Na}]$ ): 641.9470; Found: 641.9466.

## 12. Synthesis of the polyphosphates:

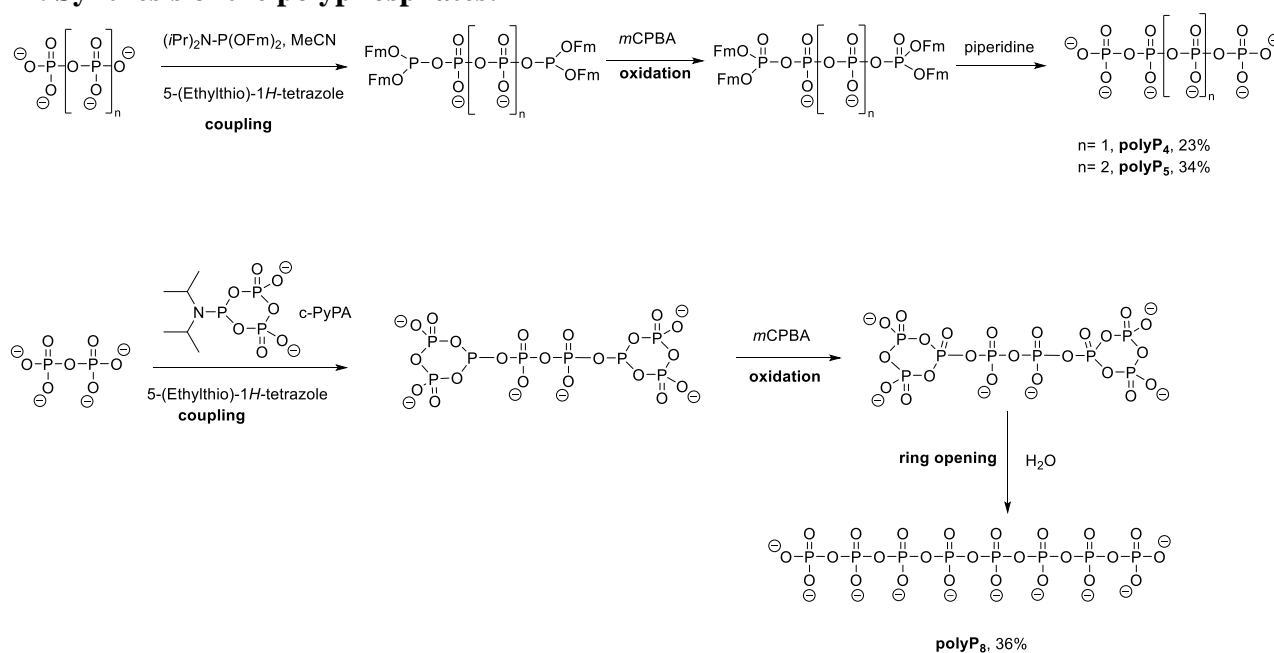

**Scheme S1:** Synthesis of polyphosphates with defined chain lengths.

### PolyP<sub>4</sub>:

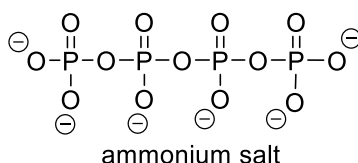

5-(Ethylthio)-1*H*-tetrazole (ETT) (294 mg, 2.26 mmol, 5.0 equiv.) and (*i*Pr)<sub>2</sub>N-P(OFm)<sub>2</sub> (660 mg, 1.14 mmol, 2.5 equiv.) were separately coevaporated with dry MeCN (2 × 2 mL). Pyrophosphate × 2 TBA (0.075 M in MeCN, 6 mL, 0.450 mmol, 1.0 equiv.) was added to ETT followed by a solution of (*i*Pr)<sub>2</sub>N-P(OFm)<sub>2</sub> in dry DCM (6 mL). The reaction mixture was stirred for 20 min. Subsequently the mixture was cooled to 0 °C and *m*CPBA (70%, 244 mg, 0.990 mmol, 2.2 equiv.) was added to the mixture. The reaction mixture was stirred for 20 min before piperidine (10V%, 1.2 mL) was added at 0 °C. The cooling bath was removed after 5 min and the mixture was stirred in total for 1 h. The crude product was precipitated by NaClO<sub>4</sub> (0.5 M in acetone), centrifuged, washed with acetone (3 × 10 mL) and purified by anion exchange chromatography (Q Sepharose® Fast Flow, increasing concentrations of aq. NH<sub>4</sub>HCO<sub>3</sub>). Fractions eluted with 300 mM aqueous NH<sub>4</sub>HCO<sub>3</sub> were combined and lyophilized. To remove buffer, the product was dissolved again in water and lyophilized (2 × 10 mL). **PolyP<sub>4</sub>** ammonium salt (45 mg, 0.102 mmol, 23%) was obtained as a white powder.

<sup>31</sup>P-NMR (162 MHz, D<sub>2</sub>O) δ = -8.20 – -8.61 (m, 2P), -22.28 – -22.73 (m, 2P) ppm. HRMS CE-ESI calculated for H<sub>5</sub>O<sub>13</sub>P<sub>4</sub> [M-H]<sup>-</sup>: 336.8686, found: 336.8660.

### PolyP<sub>5</sub>:

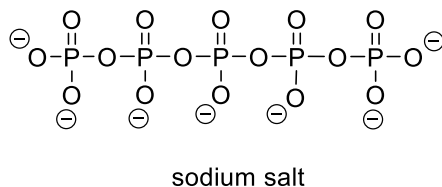

5-(Ethylthio)-1*H*-tetrazole (439 mg, 3.37 mmol, 5.0 equiv.) and (*i*Pr)<sub>2</sub>N-P(OFm)<sub>2</sub> (880 mg, 1.43 mmol, 2.1 equiv.) were separately coevaporated with dry MeCN (2 × 2 mL). Triphosphate × 3 TBA (0.075 M in MeCN, 9 mL, 0.675 mmol, 1.0 equiv.) was added to ETT followed by a solution of (*i*Pr)<sub>2</sub>N-P(OFm)<sub>2</sub> in dry DCM (20 mL). The reaction mixture was stirred for 20 min. Subsequently the mixture was cooled to 0 °C and *m*CPBA (70%, 366 mg, 1.49 mmol,



### 13. Crystallographic data:

#### Crystallographic data of 4:

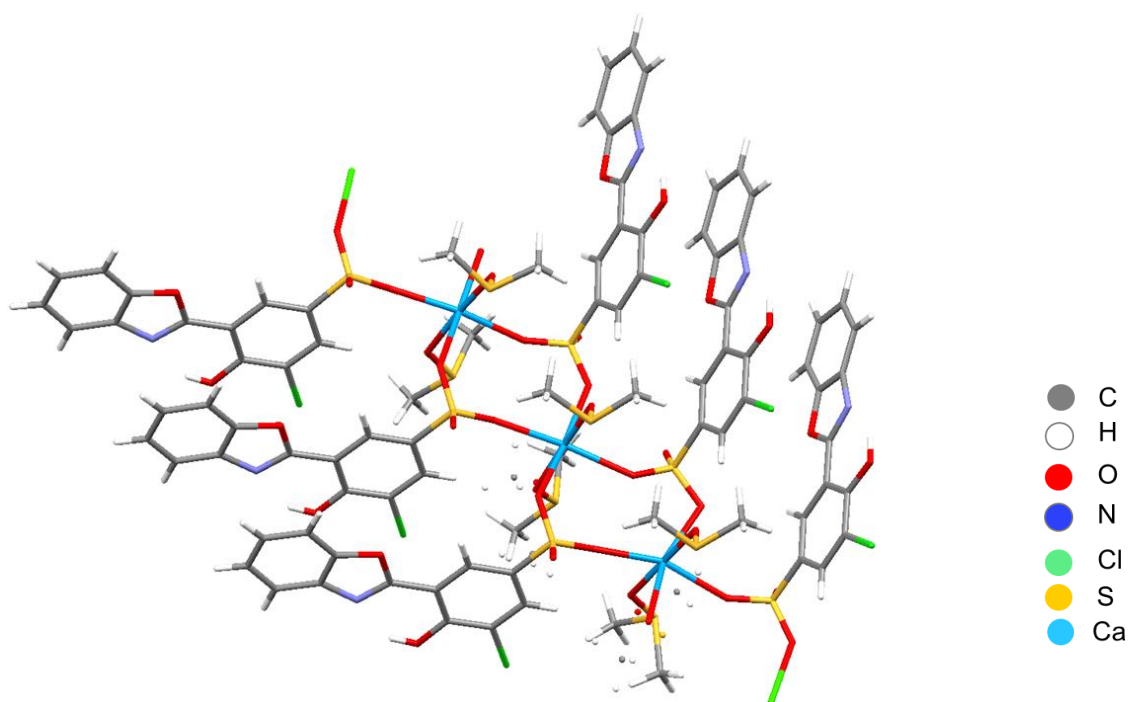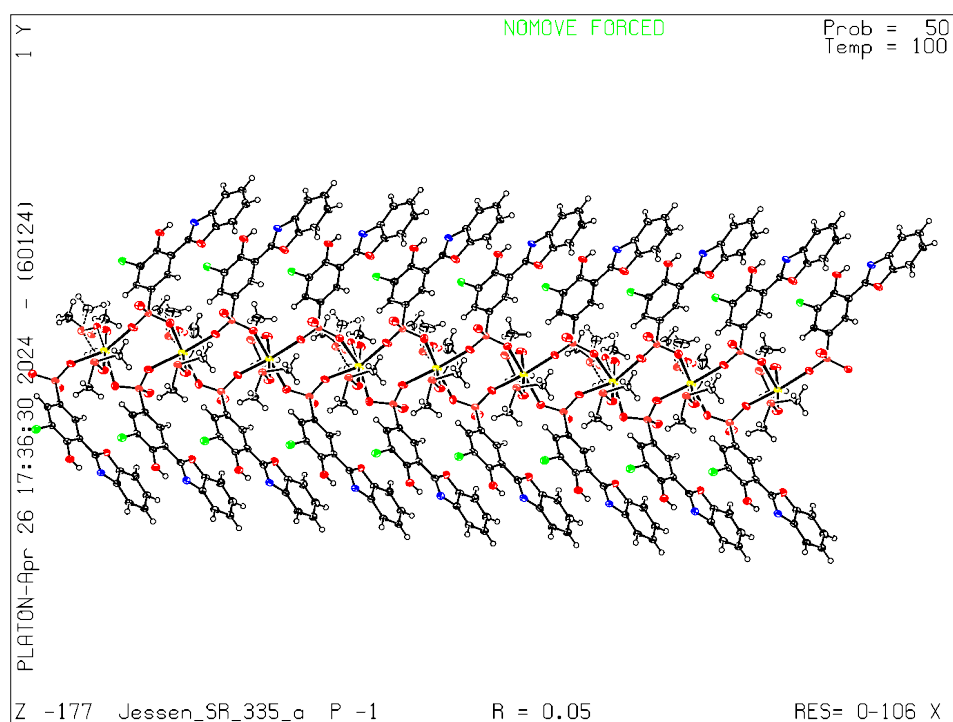

Figure S9: Crystal structure of 4.



During crystallization process, crystal of  $\text{Ca}^{2+}$  salt of **4** was obtained. Crystals were obtained at room temperature by layering of a solution in acetonitrile with methanol. A colourless, needle-shaped crystal of **4** was mounted on a MiTeGen micromount with perfluoroether oil. Data were collected from a shock-cooled single crystal at 100(2) K on a Bruker D8 VENTURE dual wavelength Mo/Cu three-circle diffractometer with a microfocus sealed X-ray tube using a mirror optics as monochromator and a Bruker PHOTON III detector. The diffractometer was equipped with an Oxford Cryostream 800 low temperature device and used  $\text{MoK}\alpha$  radiation ( $\lambda = 0.71073 \text{ \AA}$ ). All data were integrated with SAINT and a multi-scan absorption correction using SADABS was applied.<sup>[2,3]</sup> The structure was solved by direct methods using SHELXT and refined by full-matrix least-squares methods against  $F^2$  by SHELXL-2019/2.<sup>[4,5]</sup> All non-hydrogen atoms were refined with anisotropic displacement parameters. All C-bound hydrogen atoms were refined isotropic on calculated positions using a riding model with their Uiso values constrained to 1.5 times the Ueq of their pivot atoms for terminal  $\text{sp}^3$  carbon atoms and 1.2 times for all other carbon atoms. Disordered moieties were refined using bond lengths restraints and displacement parameter restraints. Some parts of the disorder model were introduced by the program DSR.<sup>[6,7]</sup> Crystallographic data for the structures reported here have been deposited with the Cambridge Crystallographic Data Centre.<sup>[8]</sup> CCDC 2352054 contain the supplementary crystallographic data for this paper. These data can be obtained free of charge from The Cambridge Crystallographic Data Centre via [www.ccdc.cam.ac.uk/structures](http://www.ccdc.cam.ac.uk/structures). This report and the CIF file were generated using FinalCif.<sup>[9]</sup>

**Table S2.** Crystal data and structure refinement for **4**

|                                            |                                                                                        |
|--------------------------------------------|----------------------------------------------------------------------------------------|
| CCDC number                                | 2352054                                                                                |
| Empirical formula                          | $\text{C}_{90}\text{H}_{78}\text{Ca}_3\text{Cl}_6\text{N}_6\text{O}_{36}\text{S}_{12}$ |
| Formula weight                             | 2537.24                                                                                |
| Temperature [K]                            | 100(2)                                                                                 |
| Crystal system                             | triclinic                                                                              |
| Space group (number)                       | $P\bar{1}$ (2)                                                                         |
| $a$ [ $\text{\AA}$ ]                       | 15.316(4)                                                                              |
| $b$ [ $\text{\AA}$ ]                       | 18.777(6)                                                                              |
| $c$ [ $\text{\AA}$ ]                       | 21.258(6)                                                                              |
| $\alpha$ [ $^\circ$ ]                      | 104.191(7)                                                                             |
| $\beta$ [ $^\circ$ ]                       | 108.995(12)                                                                            |
| $\gamma$ [ $^\circ$ ]                      | 106.901(9)                                                                             |
| Volume [ $\text{\AA}^3$ ]                  | 5126(3)                                                                                |
| $Z$                                        | 2                                                                                      |
| $\rho_{\text{calc}}$ [ $\text{gcm}^{-3}$ ] | 1.644                                                                                  |
| $\mu$ [ $\text{mm}^{-1}$ ]                 | 0.651                                                                                  |

|                                                                   |                                                                   |
|-------------------------------------------------------------------|-------------------------------------------------------------------|
| $F(000)$                                                          | 2604                                                              |
| Crystal size [mm <sup>3</sup> ]                                   | 0.198×0.029×0.029                                                 |
| Crystal colour                                                    | colourless                                                        |
| Crystal shape                                                     | needle                                                            |
| Radiation                                                         | MoK $\alpha$ ( $\lambda=0.71073$ Å)                               |
| 2 $\theta$ range [°]                                              | 2.45 to 61.29 (0.70 Å)                                            |
| Index ranges                                                      | -21 ≤ h ≤ 21<br>-26 ≤ k ≤ 26<br>-30 ≤ l ≤ 30                      |
| Reflections collected                                             | 254457                                                            |
| Independent reflections                                           | 31429<br>$R_{\text{int}} = 0.0924$<br>$R_{\text{sigma}} = 0.0754$ |
| Completeness to<br>$\theta = 25.242^\circ$                        | 100.0 %                                                           |
| Data / Restraints / Parameters                                    | 31429/320/1480                                                    |
| Absorption correction<br>$T_{\text{min}}/T_{\text{max}}$ (method) | 0.6718/0.7461<br>(multi-scan)                                     |
| Goodness-of-fit on $F^2$                                          | 1.011                                                             |
| Final $R$ indexes<br>[ $I \geq 2\sigma(I)$ ]                      | $R_1 = 0.0548$<br>$wR_2 = 0.1319$                                 |
| Final $R$ indexes<br>[all data]                                   | $R_1 = 0.1101$<br>$wR_2 = 0.1605$                                 |
| Largest peak/hole [eÅ <sup>-3</sup> ]                             | 1.34/-0.72                                                        |

**Table S3.** Atomic coordinates and  $U_{\text{eq}}$  [Å<sup>2</sup>] for **4**

| Atom  | x          | y          | z          | $U_{\text{eq}}$ |
|-------|------------|------------|------------|-----------------|
| Ca1   | 0.26506(4) | 0.24400(3) | 0.49221(3) | 0.01861(11)     |
| Ca2   | 0.60973(4) | 0.25255(3) | 0.49339(3) | 0.02225(12)     |
| Ca3   | 0.90553(4) | 0.23486(3) | 0.48812(3) | 0.02230(12)     |
| O1_1  | 0.6626(8)  | 0.2143(6)  | 0.5902(6)  | 0.0249(16)      |
| S1_1  | 0.6681(4)  | 0.1357(4)  | 0.5904(4)  | 0.0217(8)       |
| C1_1  | 0.6986(8)  | 0.1398(5)  | 0.6780(3)  | 0.060(2)        |
| H1A_1 | 0.648596   | 0.150917   | 0.693369   | 0.090           |
| H1B_1 | 0.765695   | 0.182537   | 0.709895   | 0.090           |
| H1C_1 | 0.698690   | 0.088191   | 0.679887   | 0.090           |
| C2_1  | 0.5461(5)  | 0.0566(4)  | 0.5471(4)  | 0.055(2)        |
| H2A_1 | 0.513078   | 0.052202   | 0.497511   | 0.083           |
| H2B_1 | 0.505741   | 0.067924   | 0.572726   | 0.083           |
| H2C_1 | 0.551865   | 0.006036   | 0.547225   | 0.083           |
| O1_2  | 0.6442(10) | 0.2039(6)  | 0.5829(7)  | 0.041(2)        |
| S1_2  | 0.6609(5)  | 0.1294(5)  | 0.5910(4)  | 0.0394(14)      |
| C1_2  | 0.7687(5)  | 0.1679(4)  | 0.6751(3)  | 0.0391(17)      |
| H1A_2 | 0.770583   | 0.124444   | 0.692629   | 0.059           |
| H1B_2 | 0.764280   | 0.210209   | 0.710021   | 0.059           |
| H1C_2 | 0.830203   | 0.190139   | 0.668875   | 0.059           |
| C2_2  | 0.5742(6)  | 0.0985(4)  | 0.6277(5)  | 0.060(2)        |

|       |             |             |             |             |
|-------|-------------|-------------|-------------|-------------|
| H2A_2 | 0.505633    | 0.084575    | 0.592818    | 0.090       |
| H2B_2 | 0.591361    | 0.142324    | 0.671748    | 0.090       |
| H2C_2 | 0.577899    | 0.051437    | 0.638768    | 0.090       |
| C11_3 | 0.35915(5)  | 0.30452(4)  | 0.80918(3)  | 0.02436(14) |
| O1_3  | 0.15244(14) | 0.55465(11) | 0.81085(9)  | 0.0247(4)   |
| S1_3  | 0.17059(5)  | 0.37624(4)  | 0.58282(3)  | 0.01934(13) |
| O2_3  | 0.29980(15) | 0.41561(11) | 0.88821(9)  | 0.0244(4)   |
| H2A_3 | 0.282(2)    | 0.4455(19)  | 0.9080(10)  | 0.037       |
| N1_3  | 0.21147(17) | 0.51665(13) | 0.90323(11) | 0.0217(5)   |
| O3_3  | 0.21843(16) | 0.45205(11) | 0.57868(10) | 0.0313(5)   |
| O5_3  | 0.19900(14) | 0.31372(11) | 0.55212(9)  | 0.0254(4)   |
| O6_3  | 0.06142(14) | 0.34924(11) | 0.55547(9)  | 0.0262(4)   |
| C1_3  | 0.17428(19) | 0.57393(15) | 0.92441(13) | 0.0210(5)   |
| C2_3  | 0.1677(2)   | 0.60581(15) | 0.98825(14) | 0.0237(6)   |
| H2_3  | 0.192735    | 0.591230    | 1.028090    | 0.028       |
| C3_3  | 0.1225(2)   | 0.66016(15) | 0.99054(14) | 0.0249(6)   |
| H3_3  | 0.114277    | 0.681840    | 1.032525    | 0.030       |
| C4_3  | 0.0888(2)   | 0.68383(16) | 0.93312(15) | 0.0271(6)   |
| H4_3  | 0.060325    | 0.722468    | 0.937683    | 0.033       |
| C5_3  | 0.0956(2)   | 0.65251(16) | 0.86945(15) | 0.0284(6)   |
| H5_3  | 0.072512    | 0.668114    | 0.829995    | 0.034       |
| C6_3  | 0.1385(2)   | 0.59700(15) | 0.86745(14) | 0.0231(5)   |
| C7_3  | 0.19609(19) | 0.50820(15) | 0.83738(13) | 0.0205(5)   |
| C8_3  | 0.22037(19) | 0.45447(14) | 0.79089(13) | 0.0201(5)   |
| C9_3  | 0.19086(19) | 0.44384(14) | 0.71861(13) | 0.0197(5)   |
| H9_3  | 0.154810    | 0.472616    | 0.699127    | 0.024       |
| C10_3 | 0.21413(18) | 0.39136(14) | 0.67534(13) | 0.0189(5)   |
| C11_3 | 0.26956(19) | 0.35039(14) | 0.70360(13) | 0.0197(5)   |
| H11_3 | 0.288381    | 0.316585    | 0.674341    | 0.024       |
| C12_3 | 0.29663(19) | 0.35966(15) | 0.77463(13) | 0.0200(5)   |
| C13_3 | 0.27250(19) | 0.41065(15) | 0.81996(13) | 0.0201(5)   |
| C11_4 | 0.68994(5)  | 0.29788(4)  | 0.81023(3)  | 0.02570(14) |
| O1_4  | 0.49009(14) | 0.55239(11) | 0.81415(9)  | 0.0234(4)   |
| S1_4  | 0.51658(5)  | 0.38174(4)  | 0.58784(3)  | 0.01814(13) |
| O2_4  | 0.63017(15) | 0.40822(11) | 0.88927(9)  | 0.0244(4)   |
| H2A_4 | 0.614(2)    | 0.4417(19)  | 0.9109(10)  | 0.037       |
| N1_4  | 0.54627(16) | 0.51253(12) | 0.90584(11) | 0.0206(4)   |
| O3_4  | 0.57732(14) | 0.45818(11) | 0.59046(10) | 0.0261(4)   |
| O5_4  | 0.53516(14) | 0.31438(11) | 0.55348(9)  | 0.0254(4)   |
| O6_4  | 0.40923(13) | 0.36493(10) | 0.55883(9)  | 0.0226(4)   |
| C1_4  | 0.51144(19) | 0.57117(15) | 0.92777(13) | 0.0198(5)   |
| C2_4  | 0.5057(2)   | 0.60371(15) | 0.99160(13) | 0.0226(5)   |
| H2_4  | 0.528890    | 0.587879    | 1.030905    | 0.027       |
| C3_4  | 0.4645(2)   | 0.66049(16) | 0.99523(14) | 0.0250(6)   |
| H3_4  | 0.458577    | 0.683530    | 1.037917    | 0.030       |
| C4_4  | 0.4314(2)   | 0.68479(16) | 0.93800(14) | 0.0267(6)   |
| H4_4  | 0.404097    | 0.724158    | 0.942905    | 0.032       |
| C5_4  | 0.4375(2)   | 0.65261(16) | 0.87367(15) | 0.0278(6)   |

|       |             |              |             |             |
|-------|-------------|--------------|-------------|-------------|
| H5_4  | 0.415899    | 0.669117     | 0.834591    | 0.033       |
| C6_4  | 0.4768(2)   | 0.59541(16)  | 0.87093(13) | 0.0233(5)   |
| C7_4  | 0.53209(19) | 0.50466(15)  | 0.84033(13) | 0.0202(5)   |
| C8_4  | 0.55508(19) | 0.45031(15)  | 0.79367(13) | 0.0208(5)   |
| C9_4  | 0.52856(18) | 0.44196(15)  | 0.72179(13) | 0.0194(5)   |
| H9_4  | 0.494759    | 0.472342     | 0.702966    | 0.023       |
| C10_4 | 0.55143(19) | 0.38972(14)  | 0.67831(13) | 0.0192(5)   |
| C11_4 | 0.60194(18) | 0.34489(15)  | 0.70511(13) | 0.0202(5)   |
| H11_4 | 0.618125    | 0.309403     | 0.675117    | 0.024       |
| C12_4 | 0.62776(19) | 0.35308(15)  | 0.77559(13) | 0.0205(5)   |
| C13_4 | 0.60474(19) | 0.40458(15)  | 0.82144(13) | 0.0199(5)   |
| Cl1_5 | 1.02546(5)  | 0.30347(4)   | 0.81057(3)  | 0.02594(14) |
| O1_5  | 0.81933(14) | 0.55430(11)  | 0.81799(9)  | 0.0238(4)   |
| S1_5  | 0.85151(5)  | 0.39215(4)   | 0.59268(3)  | 0.01919(13) |
| O2_5  | 0.96374(14) | 0.41150(11)  | 0.89186(9)  | 0.0242(4)   |
| H2A_5 | 0.949(2)    | 0.4462(19)   | 0.9148(10)  | 0.036       |
| N1_5  | 0.87526(16) | 0.51331(12)  | 0.90903(11) | 0.0211(4)   |
| O3_5  | 0.91503(15) | 0.46800(11)  | 0.59617(10) | 0.0297(4)   |
| O5_5  | 0.86599(15) | 0.32386(11)  | 0.55657(10) | 0.0288(4)   |
| O6_5  | 0.74513(14) | 0.37884(12)  | 0.56450(10) | 0.0269(4)   |
| C1_5  | 0.83847(19) | 0.57099(15)  | 0.93047(13) | 0.0210(5)   |
| C2_5  | 0.8303(2)   | 0.60207(15)  | 0.99421(13) | 0.0232(5)   |
| H2_5  | 0.853090    | 0.585943     | 1.033376    | 0.028       |
| C3_5  | 0.7875(2)   | 0.65735(15)  | 0.99721(14) | 0.0242(6)   |
| H3_5  | 0.779849    | 0.679117     | 1.039425    | 0.029       |
| C4_5  | 0.7549(2)   | 0.68257(16)  | 0.94037(14) | 0.0265(6)   |
| H4_5  | 0.726581    | 0.721284     | 0.945187    | 0.032       |
| C5_5  | 0.7631(2)   | 0.65204(16)  | 0.87692(14) | 0.0261(6)   |
| H5_5  | 0.741766    | 0.668909     | 0.838054    | 0.031       |
| C6_5  | 0.8043(2)   | 0.59575(15)  | 0.87416(13) | 0.0220(5)   |
| C7_5  | 0.86187(19) | 0.50683(15)  | 0.84385(13) | 0.0203(5)   |
| C8_5  | 0.88757(19) | 0.45444(15)  | 0.79728(13) | 0.0207(5)   |
| C9_5  | 0.86115(19) | 0.44788(15)  | 0.72610(13) | 0.0206(5)   |
| H9_5  | 0.826066    | 0.477878     | 0.707939    | 0.025       |
| C10_5 | 0.88577(19) | 0.39808(15)  | 0.68213(13) | 0.0194(5)   |
| C11_5 | 0.93768(19) | 0.35366(15)  | 0.70787(13) | 0.0210(5)   |
| H11_5 | 0.955364    | 0.319924     | 0.677577    | 0.025       |
| C12_5 | 0.96287(19) | 0.35963(15)  | 0.77819(14) | 0.0222(5)   |
| C13_5 | 0.93816(19) | 0.40900(15)  | 0.82426(13) | 0.0204(5)   |
| Cl1_6 | 1.01316(5)  | 0.20802(4)   | 0.18469(3)  | 0.02546(14) |
| O1_6  | 0.64122(13) | -0.04935(10) | 0.19149(9)  | 0.0224(4)   |
| S1_6  | 1.00876(5)  | 0.10587(4)   | 0.40354(3)  | 0.01887(13) |
| O2_6  | 0.80212(14) | 0.10041(11)  | 0.11251(9)  | 0.0235(4)   |
| H2A_6 | 0.743(2)    | 0.0679(19)   | 0.0925(10)  | 0.035       |
| N1_6  | 0.63275(16) | -0.00559(12) | 0.10069(11) | 0.0201(4)   |
| O3_6  | 0.96069(14) | 0.02582(11)  | 0.40038(10) | 0.0264(4)   |
| O5_6  | 1.11483(13) | 0.12903(11)  | 0.41711(9)  | 0.0236(4)   |
| O6_6  | 0.99608(14) | 0.16663(11)  | 0.45319(9)  | 0.0267(4)   |

|       |             |              |             |             |
|-------|-------------|--------------|-------------|-------------|
| C1_6  | 0.53786(19) | -0.06424(15) | 0.08231(13) | 0.0207(5)   |
| C2_6  | 0.4464(2)   | -0.09507(15) | 0.02126(13) | 0.0224(5)   |
| H2_6  | 0.440738    | -0.077812    | -0.017778   | 0.027       |
| C3_6  | 0.3644(2)   | -0.15217(15) | 0.02066(14) | 0.0243(6)   |
| H3_6  | 0.300842    | -0.174303    | -0.019684   | 0.029       |
| C4_6  | 0.3730(2)   | -0.17800(16) | 0.07809(14) | 0.0254(6)   |
| H4_6  | 0.315138    | -0.217391    | 0.075441    | 0.030       |
| C5_6  | 0.4631(2)   | -0.14795(16) | 0.13837(14) | 0.0262(6)   |
| H5_6  | 0.469445    | -0.165398    | 0.177339    | 0.031       |
| C6_6  | 0.54344(19) | -0.09076(15) | 0.13807(14) | 0.0224(5)   |
| C7_6  | 0.68898(19) | 0.00016(14)  | 0.16441(13) | 0.0195(5)   |
| C8_6  | 0.79491(19) | 0.05276(14)  | 0.20747(13) | 0.0199(5)   |
| C9_6  | 0.84543(18) | 0.05504(14)  | 0.27615(13) | 0.0194(5)   |
| H9_6  | 0.810050    | 0.022516     | 0.295209    | 0.023       |
| C10_6 | 0.94711(19) | 0.10459(14)  | 0.31673(13) | 0.0189(5)   |
| C11_6 | 0.99957(19) | 0.15281(15)  | 0.28886(13) | 0.0203(5)   |
| H11_6 | 1.069176    | 0.186920     | 0.316450    | 0.024       |
| C12_6 | 0.94868(19) | 0.15012(15)  | 0.22058(13) | 0.0207(5)   |
| C13_6 | 0.84586(19) | 0.10043(15)  | 0.17846(13) | 0.0201(5)   |
| Cl1_7 | 0.66933(5)  | 0.20733(4)   | 0.17290(3)  | 0.02540(14) |
| O1_7  | 0.30252(13) | -0.04953(11) | 0.18546(9)  | 0.0240(4)   |
| S1_7  | 0.67428(5)  | 0.10761(4)   | 0.39289(3)  | 0.01887(13) |
| O2_7  | 0.45839(14) | 0.09778(11)  | 0.10221(9)  | 0.0236(4)   |
| H2A_7 | 0.396(2)    | 0.0628(18)   | 0.0817(10)  | 0.035       |
| N1_7  | 0.29123(16) | -0.00826(13) | 0.09273(11) | 0.0220(5)   |
| O3_7  | 0.61131(14) | 0.03879(11)  | 0.39907(10) | 0.0288(4)   |
| O5_7  | 0.77116(14) | 0.10817(11)  | 0.39676(10) | 0.0250(4)   |
| O6_7  | 0.69257(15) | 0.18470(11)  | 0.44362(10) | 0.0293(4)   |
| C1_7  | 0.19667(19) | -0.06677(15) | 0.07567(14) | 0.0215(5)   |
| C2_7  | 0.1049(2)   | -0.09869(16) | 0.01549(14) | 0.0238(6)   |
| H2_7  | 0.098128    | -0.082514    | -0.024215   | 0.029       |
| C3_7  | 0.0237(2)   | -0.15528(16) | 0.01615(14) | 0.0258(6)   |
| H3_7  | -0.040316   | -0.177994    | -0.023821   | 0.031       |
| C4_7  | 0.0341(2)   | -0.17968(16) | 0.07454(15) | 0.0277(6)   |
| H4_7  | -0.023095   | -0.219043    | 0.072703    | 0.033       |
| C5_7  | 0.1251(2)   | -0.14824(16) | 0.13483(15) | 0.0282(6)   |
| H5_7  | 0.132618    | -0.164367    | 0.174607    | 0.034       |
| C6_7  | 0.2040(2)   | -0.09176(15) | 0.13262(13) | 0.0229(5)   |
| C7_7  | 0.34871(19) | -0.00152(15) | 0.15653(13) | 0.0204(5)   |
| C8_7  | 0.45445(19) | 0.05154(15)  | 0.19869(13) | 0.0211(5)   |
| C9_7  | 0.50721(19) | 0.05498(14)  | 0.26728(13) | 0.0193(5)   |
| H9_7  | 0.473404    | 0.022729     | 0.287271    | 0.023       |
| C10_7 | 0.60782(19) | 0.10474(15)  | 0.30618(13) | 0.0207(5)   |
| C11_7 | 0.65927(19) | 0.15308(15)  | 0.27785(13) | 0.0204(5)   |
| H11_7 | 0.728843    | 0.187504     | 0.304950    | 0.024       |
| C12_7 | 0.60666(19) | 0.14968(14)  | 0.20953(13) | 0.0201(5)   |
| C13_7 | 0.50390(19) | 0.09911(15)  | 0.16842(13) | 0.0195(5)   |
| Cl1_8 | 0.34857(5)  | 0.21101(4)   | 0.17852(3)  | 0.02457(14) |

|        |              |              |             |             |
|--------|--------------|--------------|-------------|-------------|
| O1_8   | -0.01547(13) | -0.04405(11) | 0.19546(9)  | 0.0239(4)   |
| S1_8   | 0.35564(5)   | 0.10965(4)   | 0.39926(3)  | 0.01900(13) |
| O2_8   | 0.13734(14)  | 0.10263(11)  | 0.10997(9)  | 0.0236(4)   |
| H2A_8  | 0.080(2)     | 0.0711(19)   | 0.0920(10)  | 0.035       |
| N1_8   | -0.02904(16) | -0.00383(13) | 0.10190(11) | 0.0219(5)   |
| O3_8   | 0.31379(15)  | 0.02800(11)  | 0.39425(11) | 0.0339(5)   |
| O5_8   | 0.46218(14)  | 0.13842(11)  | 0.41379(10) | 0.0253(4)   |
| O6_8   | 0.33740(15)  | 0.16468(12)  | 0.44927(10) | 0.0294(4)   |
| C1_8   | -0.1230(2)   | -0.06218(15) | 0.08587(14) | 0.0216(5)   |
| C2_8   | -0.2157(2)   | -0.09526(15) | 0.02618(14) | 0.0243(6)   |
| H2_8   | -0.223805    | -0.079956    | -0.014080   | 0.029       |
| C3_8   | -0.2954(2)   | -0.15127(16) | 0.02818(15) | 0.0258(6)   |
| H3_8   | -0.359843    | -0.174444    | -0.011475   | 0.031       |
| C4_8   | -0.2842(2)   | -0.17488(16) | 0.08672(15) | 0.0280(6)   |
| H4_8   | -0.340973    | -0.214030    | 0.085530    | 0.034       |
| C5_8   | -0.1921(2)   | -0.14267(16) | 0.14673(15) | 0.0274(6)   |
| H5_8   | -0.183725    | -0.158193    | 0.186885    | 0.033       |
| C6_8   | -0.1141(2)   | -0.08654(15) | 0.14353(14) | 0.0226(5)   |
| C7_8   | 0.0298(2)    | 0.00421(15)  | 0.16588(14) | 0.0218(5)   |
| C8_8   | 0.1357(2)    | 0.05705(15)  | 0.20691(13) | 0.0216(5)   |
| C9_8   | 0.18951(19)  | 0.06013(15)  | 0.27509(13) | 0.0207(5)   |
| H9_8   | 0.156049     | 0.028155     | 0.295424    | 0.025       |
| C10_8  | 0.2909(2)    | 0.10917(15)  | 0.31340(13) | 0.0207(5)   |
| C11_8  | 0.34117(19)  | 0.15717(15)  | 0.28453(13) | 0.0200(5)   |
| H11_8  | 0.410876     | 0.191418     | 0.311101    | 0.024       |
| C12_8  | 0.2875(2)    | 0.15397(15)  | 0.21632(13) | 0.0204(5)   |
| C13_8  | 0.18420(19)  | 0.10422(15)  | 0.17594(13) | 0.0197(5)   |
| O1_9   | 0.23771(14)  | 0.29012(10)  | 0.39887(9)  | 0.0255(4)   |
| S1_9   | 0.29698(5)   | 0.37280(4)   | 0.40238(3)  | 0.02032(13) |
| C1_9   | 0.2805(2)    | 0.35748(17)  | 0.31192(14) | 0.0293(6)   |
| H1A_9  | 0.208302     | 0.331844     | 0.279627    | 0.044       |
| H1B_9  | 0.313568     | 0.322849     | 0.298068    | 0.044       |
| H1C_9  | 0.310671     | 0.409367     | 0.308623    | 0.044       |
| C2_9   | 0.2194(2)    | 0.42598(17)  | 0.40669(17) | 0.0317(6)   |
| H2A_9  | 0.249949     | 0.478281     | 0.404223    | 0.047       |
| H2B_9  | 0.212660     | 0.433994     | 0.451939    | 0.047       |
| H2C_9  | 0.152487     | 0.395106     | 0.366307    | 0.047       |
| O1_10  | 0.57285(15)  | 0.30290(11)  | 0.40305(9)  | 0.0271(4)   |
| S1_10  | 0.63683(5)   | 0.38425(4)   | 0.40695(3)  | 0.02201(14) |
| C1_10  | 0.6096(2)    | 0.37102(17)  | 0.31535(14) | 0.0314(7)   |
| H1A_10 | 0.632151     | 0.330884     | 0.295226    | 0.047       |
| H1B_10 | 0.644954     | 0.422215     | 0.312894    | 0.047       |
| H1C_10 | 0.536682     | 0.352729     | 0.287750    | 0.047       |
| C2_10  | 0.5711(2)    | 0.44581(17)  | 0.42256(16) | 0.0312(6)   |
| H2A_10 | 0.606047     | 0.498645     | 0.422626    | 0.047       |
| H2B_10 | 0.569033     | 0.452141     | 0.469125    | 0.047       |
| H2C_10 | 0.502107     | 0.420566     | 0.384512    | 0.047       |
| O1_11  | 0.88748(14)  | 0.28682(11)  | 0.39889(10) | 0.0274(4)   |

|        |             |             |             |             |
|--------|-------------|-------------|-------------|-------------|
| S1_11  | 0.95598(5)  | 0.36706(4)  | 0.40310(3)  | 0.02187(14) |
| C1_11  | 0.9309(2)   | 0.35290(17) | 0.31188(14) | 0.0302(6)   |
| H1A_11 | 0.951735    | 0.311254    | 0.292226    | 0.045       |
| H1B_11 | 0.968616    | 0.403379    | 0.309432    | 0.045       |
| H1C_11 | 0.858432    | 0.336295    | 0.283846    | 0.045       |
| C2_11  | 0.8939(2)   | 0.43183(17) | 0.41756(17) | 0.0327(7)   |
| H2A_11 | 0.930064    | 0.483335    | 0.415965    | 0.049       |
| H2B_11 | 0.892746    | 0.440760    | 0.464636    | 0.049       |
| H2C_11 | 0.824486    | 0.407110    | 0.380041    | 0.049       |
| O1_12  | 0.30765(15) | 0.20488(11) | 0.59027(10) | 0.0279(4)   |
| S1_12  | 0.34539(6)  | 0.13872(4)  | 0.59314(4)  | 0.02829(16) |
| C1_12  | 0.3580(3)   | 0.13068(19) | 0.67709(15) | 0.0401(8)   |
| H1A_12 | 0.294433    | 0.123504    | 0.681361    | 0.060       |
| H1B_12 | 0.412323    | 0.179720    | 0.716185    | 0.060       |
| H1C_12 | 0.374045    | 0.084389    | 0.679934    | 0.060       |
| C2_12  | 0.2394(2)   | 0.04852(17) | 0.53581(15) | 0.0352(7)   |
| H2A_12 | 0.215830    | 0.047292    | 0.486654    | 0.053       |
| H2B_12 | 0.185477    | 0.045031    | 0.551631    | 0.053       |
| H2C_12 | 0.257885    | 0.002951    | 0.537168    | 0.053       |
| O1_13  | 0.9281(2)   | 0.18543(14) | 0.58053(12) | 0.0280(5)   |
| S1_13  | 0.96063(9)  | 0.11681(5)  | 0.58349(4)  | 0.0221(2)   |
| C1_13  | 1.0941(2)   | 0.16207(18) | 0.62991(18) | 0.0340(8)   |
| H1A_13 | 1.119112    | 0.121712    | 0.639902    | 0.051       |
| H1B_13 | 1.114426    | 0.205414    | 0.675225    | 0.051       |
| H1C_13 | 1.122629    | 0.184098    | 0.600280    | 0.051       |
| C2_13  | 0.9347(3)   | 0.09123(19) | 0.65266(16) | 0.0309(7)   |
| H2A_13 | 0.861496    | 0.067416    | 0.637089    | 0.046       |
| H2B_13 | 0.965449    | 0.139723    | 0.696172    | 0.046       |
| H2C_13 | 0.962801    | 0.052479    | 0.662816    | 0.046       |
| O1_14  | 0.974(2)    | 0.2027(12)  | 0.5862(13)  | 0.017(4)    |
| S1_14  | 1.0086(10)  | 0.1337(6)   | 0.5896(5)   | 0.021(2)    |
| C1_14  | 1.026(3)    | 0.1289(18)  | 0.6741(10)  | 0.027(5)    |
| H1A_14 | 0.978161    | 0.145698    | 0.688996    | 0.040       |
| H1B_14 | 1.094868    | 0.164576    | 0.709345    | 0.040       |
| H1C_14 | 1.012987    | 0.073610    | 0.671080    | 0.040       |
| C2_14  | 0.8973(19)  | 0.0451(12)  | 0.5376(15)  | 0.027(6)    |
| H2A_14 | 0.846162    | 0.047665    | 0.555239    | 0.041       |
| H2B_14 | 0.912075    | -0.001513   | 0.541368    | 0.041       |
| H2C_14 | 0.871766    | 0.039847    | 0.487274    | 0.041       |

$U_{eq}$  is defined as 1/3 of the trace of the orthogonalized  $U_j$  tensor.

**Table S4.** Anisotropic displacement parameters [ $\text{\AA}^2$ ] for **4**.

The anisotropic displacement factor exponent takes the form:

$$-2\pi^2 [ h^2(a^*)^2U_{11} + k^2(b^*)^2U_{22} + \dots + 2hka^*b^*U_{12} ]$$

| Atom  | $U_{11}$   | $U_{22}$   | $U_{33}$   | $U_{23}$    | $U_{13}$    | $U_{12}$   |
|-------|------------|------------|------------|-------------|-------------|------------|
| Ca1   | 0.0240(3)  | 0.0178(2)  | 0.0124(2)  | 0.00321(18) | 0.00692(19) | 0.0093(2)  |
| Ca2   | 0.0341(3)  | 0.0204(3)  | 0.0130(2)  | 0.0043(2)   | 0.0090(2)   | 0.0150(2)  |
| Ca3   | 0.0341(3)  | 0.0202(2)  | 0.0134(2)  | 0.0046(2)   | 0.0093(2)   | 0.0145(2)  |
| O1_1  | 0.036(3)   | 0.020(3)   | 0.013(3)   | 0.006(2)    | 0.006(3)    | 0.010(2)   |
| S1_1  | 0.0196(12) | 0.0182(14) | 0.0218(16) | 0.0061(11)  | 0.0045(11)  | 0.0067(10) |
| C1_1  | 0.105(6)   | 0.041(4)   | 0.025(3)   | 0.011(3)    | 0.016(3)    | 0.034(4)   |
| C2_1  | 0.030(3)   | 0.036(3)   | 0.081(5)   | 0.036(3)    | 0.003(3)    | 0.002(3)   |
| O1_2  | 0.058(5)   | 0.024(3)   | 0.023(3)   | 0.007(3)    | -0.004(3)   | 0.017(3)   |
| S1_2  | 0.057(3)   | 0.0272(18) | 0.0245(18) | 0.0135(13)  | 0.0057(17)  | 0.0155(18) |
| C1_2  | 0.043(3)   | 0.030(3)   | 0.034(3)   | 0.004(3)    | 0.005(3)    | 0.022(3)   |
| C2_2  | 0.046(4)   | 0.042(4)   | 0.099(6)   | 0.027(4)    | 0.041(4)    | 0.013(3)   |
| Cl1_3 | 0.0301(3)  | 0.0249(3)  | 0.0194(3)  | 0.0074(2)   | 0.0090(3)   | 0.0155(3)  |
| O1_3  | 0.0357(11) | 0.0272(10) | 0.0167(9)  | 0.0075(8)   | 0.0124(8)   | 0.0191(9)  |
| S1_3  | 0.0230(3)  | 0.0208(3)  | 0.0148(3)  | 0.0051(2)   | 0.0093(2)   | 0.0096(3)  |
| O2_3  | 0.0315(11) | 0.0287(10) | 0.0130(8)  | 0.0053(8)   | 0.0082(8)   | 0.0158(9)  |
| N1_3  | 0.0273(12) | 0.0216(11) | 0.0150(10) | 0.0042(8)   | 0.0088(9)   | 0.0107(9)  |
| O3_3  | 0.0422(12) | 0.0246(10) | 0.0264(10) | 0.0120(8)   | 0.0164(9)   | 0.0085(9)  |
| O5_3  | 0.0279(10) | 0.0296(10) | 0.0188(9)  | 0.0042(8)   | 0.0101(8)   | 0.0157(8)  |
| O6_3  | 0.0253(10) | 0.0336(11) | 0.0175(9)  | 0.0051(8)   | 0.0074(8)   | 0.0149(9)  |
| C1_3  | 0.0222(13) | 0.0216(12) | 0.0171(12) | 0.0052(10)  | 0.0078(10)  | 0.0083(10) |
| C2_3  | 0.0259(14) | 0.0231(13) | 0.0173(12) | 0.0033(10)  | 0.0092(11)  | 0.0072(11) |
| C3_3  | 0.0281(14) | 0.0232(13) | 0.0191(13) | 0.0006(10)  | 0.0107(11)  | 0.0100(11) |
| C4_3  | 0.0322(15) | 0.0261(14) | 0.0268(14) | 0.0061(11)  | 0.0156(12)  | 0.0167(12) |
| C5_3  | 0.0395(17) | 0.0287(14) | 0.0213(13) | 0.0084(11)  | 0.0139(12)  | 0.0192(13) |
| C6_3  | 0.0307(14) | 0.0219(13) | 0.0179(12) | 0.0033(10)  | 0.0127(11)  | 0.0131(11) |
| C7_3  | 0.0226(13) | 0.0191(12) | 0.0169(12) | 0.0044(10)  | 0.0070(10)  | 0.0082(10) |
| C8_3  | 0.0235(13) | 0.0167(11) | 0.0186(12) | 0.0044(10)  | 0.0089(10)  | 0.0084(10) |
| C9_3  | 0.0228(13) | 0.0176(12) | 0.0170(12) | 0.0034(10)  | 0.0095(10)  | 0.0076(10) |
| C10_3 | 0.0201(12) | 0.0191(12) | 0.0138(11) | 0.0045(9)   | 0.0065(10)  | 0.0055(10) |
| C11_3 | 0.0226(13) | 0.0156(11) | 0.0172(12) | 0.0022(9)   | 0.0084(10)  | 0.0064(10) |
| C12_3 | 0.0199(12) | 0.0191(12) | 0.0204(12) | 0.0079(10)  | 0.0075(10)  | 0.0079(10) |
| C13_3 | 0.0209(13) | 0.0184(12) | 0.0154(12) | 0.0031(10)  | 0.0059(10)  | 0.0052(10) |
| Cl1_4 | 0.0328(4)  | 0.0275(3)  | 0.0207(3)  | 0.0094(3)   | 0.0106(3)   | 0.0182(3)  |
| O1_4  | 0.0355(11) | 0.0243(9)  | 0.0153(9)  | 0.0070(7)   | 0.0118(8)   | 0.0179(8)  |
| S1_4  | 0.0202(3)  | 0.0181(3)  | 0.0140(3)  | 0.0039(2)   | 0.0072(2)   | 0.0069(2)  |
| O2_4  | 0.0323(11) | 0.0288(10) | 0.0165(9)  | 0.0080(8)   | 0.0119(8)   | 0.0166(9)  |
| N1_4  | 0.0262(11) | 0.0208(10) | 0.0140(10) | 0.0038(8)   | 0.0082(9)   | 0.0112(9)  |
| O3_4  | 0.0298(10) | 0.0238(9)  | 0.0232(10) | 0.0087(8)   | 0.0136(8)   | 0.0063(8)  |
| O5_4  | 0.0319(11) | 0.0260(10) | 0.0183(9)  | 0.0041(8)   | 0.0119(8)   | 0.0142(8)  |
| O6_4  | 0.0210(9)  | 0.0248(9)  | 0.0167(9)  | 0.0055(7)   | 0.0054(7)   | 0.0070(8)  |
| C1_4  | 0.0215(13) | 0.0190(12) | 0.0158(12) | 0.0036(10)  | 0.0071(10)  | 0.0077(10) |



|       |            |            |            |             |            |            |
|-------|------------|------------|------------|-------------|------------|------------|
| C2_4  | 0.0264(14) | 0.0239(13) | 0.0149(12) | 0.0048(10)  | 0.0092(10) | 0.0083(11) |
| C3_4  | 0.0298(14) | 0.0230(13) | 0.0178(12) | 0.0018(10)  | 0.0109(11) | 0.0090(11) |
| C4_4  | 0.0335(15) | 0.0246(13) | 0.0251(14) | 0.0060(11)  | 0.0141(12) | 0.0165(12) |
| C5_4  | 0.0387(16) | 0.0275(14) | 0.0217(13) | 0.0077(11)  | 0.0152(12) | 0.0177(13) |
| C6_4  | 0.0268(14) | 0.0250(13) | 0.0169(12) | 0.0034(10)  | 0.0098(11) | 0.0120(11) |
| C7_4  | 0.0229(13) | 0.0206(12) | 0.0160(12) | 0.0063(10)  | 0.0073(10) | 0.0093(10) |
| C8_4  | 0.0207(13) | 0.0205(12) | 0.0182(12) | 0.0047(10)  | 0.0071(10) | 0.0080(10) |
| C9_4  | 0.0197(12) | 0.0197(12) | 0.0173(12) | 0.0054(10)  | 0.0074(10) | 0.0079(10) |
| C10_4 | 0.0197(12) | 0.0188(12) | 0.0160(12) | 0.0048(10)  | 0.0066(10) | 0.0062(10) |
| C11_4 | 0.0201(13) | 0.0206(12) | 0.0171(12) | 0.0041(10)  | 0.0079(10) | 0.0070(10) |
| C12_4 | 0.0214(13) | 0.0208(12) | 0.0196(12) | 0.0070(10)  | 0.0071(10) | 0.0112(10) |
| C13_4 | 0.0215(13) | 0.0199(12) | 0.0155(12) | 0.0048(10)  | 0.0076(10) | 0.0068(10) |
| C11_5 | 0.0324(4)  | 0.0260(3)  | 0.0194(3)  | 0.0067(3)   | 0.0079(3)  | 0.0171(3)  |
| O1_5  | 0.0336(11) | 0.0250(9)  | 0.0183(9)  | 0.0076(8)   | 0.0129(8)  | 0.0174(8)  |
| S1_5  | 0.0204(3)  | 0.0211(3)  | 0.0148(3)  | 0.0050(2)   | 0.0080(2)  | 0.0076(2)  |
| O2_5  | 0.0309(10) | 0.0280(10) | 0.0149(9)  | 0.0066(8)   | 0.0091(8)  | 0.0157(9)  |
| N1_5  | 0.0254(11) | 0.0203(10) | 0.0160(10) | 0.0036(8)   | 0.0083(9)  | 0.0107(9)  |
| O3_5  | 0.0339(11) | 0.0255(10) | 0.0265(10) | 0.0107(8)   | 0.0155(9)  | 0.0041(9)  |
| O5_5  | 0.0387(12) | 0.0285(10) | 0.0191(9)  | 0.0044(8)   | 0.0133(9)  | 0.0163(9)  |
| O6_5  | 0.0236(10) | 0.0369(11) | 0.0229(10) | 0.0124(9)   | 0.0101(8)  | 0.0146(9)  |
| C1_5  | 0.0227(13) | 0.0195(12) | 0.0168(12) | 0.0027(10)  | 0.0078(10) | 0.0074(10) |
| C2_5  | 0.0258(14) | 0.0224(13) | 0.0166(12) | 0.0034(10)  | 0.0073(10) | 0.0087(11) |
| C3_5  | 0.0250(14) | 0.0229(13) | 0.0179(12) | -0.0009(10) | 0.0101(11) | 0.0069(11) |
| C4_5  | 0.0292(15) | 0.0256(14) | 0.0252(14) | 0.0056(11)  | 0.0124(12) | 0.0142(12) |
| C5_5  | 0.0325(15) | 0.0273(14) | 0.0182(13) | 0.0055(11)  | 0.0098(11) | 0.0155(12) |
| C6_5  | 0.0261(14) | 0.0228(13) | 0.0169(12) | 0.0041(10)  | 0.0098(10) | 0.0118(11) |
| C7_5  | 0.0247(13) | 0.0222(12) | 0.0144(11) | 0.0064(10)  | 0.0076(10) | 0.0111(11) |
| C8_5  | 0.0245(13) | 0.0202(12) | 0.0160(12) | 0.0035(10)  | 0.0091(10) | 0.0095(10) |
| C9_5  | 0.0218(13) | 0.0193(12) | 0.0191(12) | 0.0045(10)  | 0.0088(10) | 0.0085(10) |
| C10_5 | 0.0195(12) | 0.0196(12) | 0.0141(11) | 0.0036(9)   | 0.0048(9)  | 0.0063(10) |
| C11_5 | 0.0231(13) | 0.0218(12) | 0.0156(12) | 0.0036(10)  | 0.0074(10) | 0.0093(11) |
| C12_5 | 0.0228(13) | 0.0228(13) | 0.0197(12) | 0.0072(10)  | 0.0064(10) | 0.0112(11) |
| C13_5 | 0.0211(13) | 0.0209(12) | 0.0148(11) | 0.0052(10)  | 0.0056(10) | 0.0067(10) |
| C11_6 | 0.0243(3)  | 0.0246(3)  | 0.0233(3)  | 0.0084(3)   | 0.0094(3)  | 0.0056(3)  |
| O1_6  | 0.0196(9)  | 0.0229(9)  | 0.0169(9)  | 0.0049(7)   | 0.0047(7)  | 0.0038(7)  |
| S1_6  | 0.0202(3)  | 0.0165(3)  | 0.0156(3)  | 0.0025(2)   | 0.0052(2)  | 0.0074(2)  |
| O2_6  | 0.0237(10) | 0.0265(10) | 0.0160(9)  | 0.0070(8)   | 0.0063(7)  | 0.0078(8)  |
| N1_6  | 0.0193(11) | 0.0194(10) | 0.0155(10) | 0.0016(8)   | 0.0053(8)  | 0.0062(9)  |
| O3_6  | 0.0276(10) | 0.0214(9)  | 0.0226(9)  | 0.0074(8)   | 0.0064(8)  | 0.0054(8)  |
| O5_6  | 0.0209(9)  | 0.0244(9)  | 0.0212(9)  | 0.0063(8)   | 0.0062(7)  | 0.0087(8)  |
| O6_6  | 0.0301(10) | 0.0291(10) | 0.0165(9)  | 0.0011(8)   | 0.0065(8)  | 0.0159(9)  |
| C1_6  | 0.0209(13) | 0.0193(12) | 0.0181(12) | 0.0032(10)  | 0.0085(10) | 0.0059(10) |
| C2_6  | 0.0250(13) | 0.0216(12) | 0.0153(12) | 0.0027(10)  | 0.0063(10) | 0.0088(11) |
| C3_6  | 0.0212(13) | 0.0229(13) | 0.0195(13) | -0.0007(10) | 0.0048(10) | 0.0084(11) |
| C4_6  | 0.0220(13) | 0.0230(13) | 0.0242(13) | 0.0039(11)  | 0.0096(11) | 0.0045(11) |
| C5_6  | 0.0270(14) | 0.0284(14) | 0.0215(13) | 0.0107(11)  | 0.0096(11) | 0.0089(12) |
| C6_6  | 0.0207(13) | 0.0211(12) | 0.0184(12) | 0.0025(10)  | 0.0056(10) | 0.0064(10) |
| C7_6  | 0.0210(12) | 0.0180(12) | 0.0166(12) | 0.0028(10)  | 0.0084(10) | 0.0069(10) |

|       |            |            |            |            |            |            |
|-------|------------|------------|------------|------------|------------|------------|
| C8_6  | 0.0200(12) | 0.0183(12) | 0.0169(12) | 0.0016(10) | 0.0069(10) | 0.0070(10) |
| C9_6  | 0.0195(12) | 0.0176(12) | 0.0168(12) | 0.0021(9)  | 0.0061(10) | 0.0074(10) |
| C10_6 | 0.0210(12) | 0.0166(11) | 0.0163(12) | 0.0017(9)  | 0.0068(10) | 0.0088(10) |
| C11_6 | 0.0181(12) | 0.0185(12) | 0.0207(12) | 0.0024(10) | 0.0077(10) | 0.0074(10) |
| C12_6 | 0.0236(13) | 0.0176(12) | 0.0178(12) | 0.0037(10) | 0.0086(10) | 0.0070(10) |
| C13_6 | 0.0205(13) | 0.0204(12) | 0.0178(12) | 0.0041(10) | 0.0083(10) | 0.0083(10) |
| C11_7 | 0.0259(3)  | 0.0250(3)  | 0.0217(3)  | 0.0090(3)  | 0.0096(3)  | 0.0060(3)  |
| O1_7  | 0.0204(9)  | 0.0249(9)  | 0.0202(9)  | 0.0067(8)  | 0.0061(8)  | 0.0050(8)  |
| S1_7  | 0.0205(3)  | 0.0177(3)  | 0.0162(3)  | 0.0037(2)  | 0.0068(2)  | 0.0083(2)  |
| O2_7  | 0.0223(10) | 0.0254(10) | 0.0175(9)  | 0.0060(8)  | 0.0065(7)  | 0.0062(8)  |
| N1_7  | 0.0219(11) | 0.0209(11) | 0.0200(11) | 0.0045(9)  | 0.0084(9)  | 0.0080(9)  |
| O3_7  | 0.0266(10) | 0.0287(10) | 0.0230(10) | 0.0106(8)  | 0.0076(8)  | 0.0032(8)  |
| O5_7  | 0.0249(10) | 0.0327(10) | 0.0240(10) | 0.0127(8)  | 0.0120(8)  | 0.0172(8)  |
| O6_7  | 0.0342(11) | 0.0275(10) | 0.0185(9)  | 0.0002(8)  | 0.0043(8)  | 0.0173(9)  |
| C1_7  | 0.0220(13) | 0.0187(12) | 0.0200(12) | 0.0025(10) | 0.0082(10) | 0.0080(10) |
| C2_7  | 0.0275(14) | 0.0242(13) | 0.0184(12) | 0.0056(10) | 0.0086(11) | 0.0120(11) |
| C3_7  | 0.0239(14) | 0.0228(13) | 0.0235(13) | 0.0016(11) | 0.0074(11) | 0.0089(11) |
| C4_7  | 0.0251(14) | 0.0214(13) | 0.0297(15) | 0.0032(11) | 0.0119(12) | 0.0054(11) |
| C5_7  | 0.0275(15) | 0.0263(14) | 0.0250(14) | 0.0077(11) | 0.0100(12) | 0.0063(12) |
| C6_7  | 0.0232(13) | 0.0224(13) | 0.0173(12) | 0.0029(10) | 0.0069(10) | 0.0072(11) |
| C7_7  | 0.0231(13) | 0.0203(12) | 0.0159(12) | 0.0039(10) | 0.0085(10) | 0.0086(10) |
| C8_7  | 0.0208(13) | 0.0200(12) | 0.0202(12) | 0.0039(10) | 0.0082(10) | 0.0092(10) |
| C9_7  | 0.0230(13) | 0.0175(12) | 0.0155(11) | 0.0037(9)  | 0.0074(10) | 0.0085(10) |
| C10_7 | 0.0225(13) | 0.0186(12) | 0.0180(12) | 0.0032(10) | 0.0074(10) | 0.0087(10) |
| C11_7 | 0.0203(12) | 0.0186(12) | 0.0182(12) | 0.0037(10) | 0.0063(10) | 0.0075(10) |
| C12_7 | 0.0243(13) | 0.0173(12) | 0.0196(12) | 0.0045(10) | 0.0111(10) | 0.0095(10) |
| C13_7 | 0.0227(13) | 0.0187(12) | 0.0160(12) | 0.0033(10) | 0.0079(10) | 0.0103(10) |
| C11_8 | 0.0269(3)  | 0.0252(3)  | 0.0212(3)  | 0.0098(3)  | 0.0111(3)  | 0.0082(3)  |
| O1_8  | 0.0231(10) | 0.0248(9)  | 0.0208(9)  | 0.0085(8)  | 0.0091(8)  | 0.0061(8)  |
| S1_8  | 0.0219(3)  | 0.0191(3)  | 0.0159(3)  | 0.0055(2)  | 0.0078(2)  | 0.0092(2)  |
| O2_8  | 0.0237(10) | 0.0274(10) | 0.0171(9)  | 0.0081(8)  | 0.0068(8)  | 0.0095(8)  |
| N1_8  | 0.0241(11) | 0.0214(11) | 0.0176(10) | 0.0038(9)  | 0.0084(9)  | 0.0092(9)  |
| O3_8  | 0.0366(12) | 0.0233(10) | 0.0284(11) | 0.0121(9)  | 0.0035(9)  | 0.0044(9)  |
| O5_8  | 0.0228(10) | 0.0341(11) | 0.0245(10) | 0.0118(8)  | 0.0123(8)  | 0.0155(8)  |
| O6_8  | 0.0328(11) | 0.0404(12) | 0.0179(9)  | 0.0054(8)  | 0.0113(8)  | 0.0229(9)  |
| C1_8  | 0.0251(13) | 0.0194(12) | 0.0205(13) | 0.0041(10) | 0.0114(11) | 0.0103(11) |
| C2_8  | 0.0259(14) | 0.0220(13) | 0.0210(13) | 0.0040(10) | 0.0079(11) | 0.0104(11) |
| C3_8  | 0.0239(14) | 0.0216(13) | 0.0238(13) | 0.0017(11) | 0.0073(11) | 0.0075(11) |
| C4_8  | 0.0262(14) | 0.0223(13) | 0.0327(15) | 0.0060(12) | 0.0149(12) | 0.0071(11) |
| C5_8  | 0.0300(15) | 0.0271(14) | 0.0277(14) | 0.0118(12) | 0.0144(12) | 0.0112(12) |
| C6_8  | 0.0230(13) | 0.0212(12) | 0.0192(12) | 0.0031(10) | 0.0077(10) | 0.0083(11) |
| C7_8  | 0.0247(13) | 0.0205(12) | 0.0212(13) | 0.0061(10) | 0.0120(11) | 0.0097(11) |
| C8_8  | 0.0273(14) | 0.0221(12) | 0.0172(12) | 0.0058(10) | 0.0110(11) | 0.0120(11) |
| C9_8  | 0.0232(13) | 0.0203(12) | 0.0193(12) | 0.0058(10) | 0.0104(10) | 0.0097(10) |
| C10_8 | 0.0270(14) | 0.0179(12) | 0.0188(12) | 0.0055(10) | 0.0113(11) | 0.0105(11) |
| C11_8 | 0.0207(13) | 0.0190(12) | 0.0196(12) | 0.0048(10) | 0.0090(10) | 0.0089(10) |
| C12_8 | 0.0268(14) | 0.0191(12) | 0.0168(12) | 0.0053(10) | 0.0114(10) | 0.0101(11) |
| C13_8 | 0.0247(13) | 0.0203(12) | 0.0146(11) | 0.0048(10) | 0.0082(10) | 0.0114(10) |

|       |            |            |            |            |            |            |
|-------|------------|------------|------------|------------|------------|------------|
| O1_9  | 0.0314(10) | 0.0193(9)  | 0.0174(9)  | 0.0064(7)  | 0.0059(8)  | 0.0045(8)  |
| S1_9  | 0.0223(3)  | 0.0198(3)  | 0.0154(3)  | 0.0053(2)  | 0.0064(2)  | 0.0068(3)  |
| C1_9  | 0.0351(16) | 0.0262(14) | 0.0191(13) | 0.0064(11) | 0.0117(12) | 0.0042(12) |
| C2_9  | 0.0311(16) | 0.0322(15) | 0.0405(17) | 0.0180(14) | 0.0193(14) | 0.0163(13) |
| O1_10 | 0.0365(11) | 0.0209(9)  | 0.0176(9)  | 0.0068(8)  | 0.0083(8)  | 0.0073(8)  |
| S1_10 | 0.0246(3)  | 0.0241(3)  | 0.0152(3)  | 0.0062(2)  | 0.0068(2)  | 0.0101(3)  |
| C1_10 | 0.0380(17) | 0.0321(15) | 0.0163(13) | 0.0077(11) | 0.0099(12) | 0.0068(13) |
| C2_10 | 0.0342(16) | 0.0299(15) | 0.0370(17) | 0.0148(13) | 0.0201(14) | 0.0154(13) |
| O1_11 | 0.0327(11) | 0.0249(10) | 0.0196(9)  | 0.0093(8)  | 0.0074(8)  | 0.0087(8)  |
| S1_11 | 0.0221(3)  | 0.0245(3)  | 0.0157(3)  | 0.0064(2)  | 0.0064(2)  | 0.0080(3)  |
| C1_11 | 0.0357(16) | 0.0269(14) | 0.0204(13) | 0.0073(11) | 0.0108(12) | 0.0052(12) |
| C2_11 | 0.0343(16) | 0.0311(15) | 0.0410(18) | 0.0132(14) | 0.0234(14) | 0.0162(13) |
| O1_12 | 0.0418(12) | 0.0230(9)  | 0.0193(9)  | 0.0080(8)  | 0.0109(9)  | 0.0161(9)  |
| S1_12 | 0.0393(4)  | 0.0263(3)  | 0.0198(3)  | 0.0073(3)  | 0.0100(3)  | 0.0181(3)  |
| C1_12 | 0.062(2)   | 0.0358(17) | 0.0224(15) | 0.0100(13) | 0.0120(15) | 0.0277(16) |
| C2_12 | 0.0444(18) | 0.0243(14) | 0.0264(15) | 0.0068(12) | 0.0069(13) | 0.0117(13) |
| O1_13 | 0.0395(14) | 0.0326(12) | 0.0228(11) | 0.0139(10) | 0.0163(11) | 0.0224(11) |
| S1_13 | 0.0262(6)  | 0.0208(4)  | 0.0191(4)  | 0.0071(3)  | 0.0104(4)  | 0.0088(4)  |
| C1_13 | 0.0248(16) | 0.0258(16) | 0.045(2)   | 0.0104(14) | 0.0140(14) | 0.0055(13) |
| C2_13 | 0.0391(18) | 0.0300(16) | 0.0257(16) | 0.0130(13) | 0.0172(14) | 0.0108(14) |
| O1_14 | 0.025(5)   | 0.022(5)   | 0.019(5)   | 0.016(4)   | 0.013(5)   | 0.016(5)   |
| S1_14 | 0.024(4)   | 0.022(3)   | 0.020(3)   | 0.013(3)   | 0.008(3)   | 0.010(3)   |
| C1_14 | 0.037(9)   | 0.024(8)   | 0.023(7)   | 0.017(6)   | 0.011(6)   | 0.013(7)   |
| C2_14 | 0.030(10)  | 0.021(6)   | 0.027(8)   | 0.012(8)   | 0.006(8)   | 0.010(9)   |

**Table S5.** Bond lengths and angles for **4**.

| Atom-Atom              | Length [Å] |                        |            |
|------------------------|------------|------------------------|------------|
| Ca1-O5_3               | 2.2695(19) | Ca3-O1_11              | 2.3129(19) |
| Ca1-O6_8               | 2.287(2)   | Ca3-O6_6               | 2.314(2)   |
| Ca1-O1_9               | 2.3183(19) | Ca3-O1_14              | 2.32(2)    |
| Ca1-O1_12              | 2.3357(19) | Ca3-O1_13              | 2.340(2)   |
| Ca1-O6_4               | 2.3472(19) | Ca3-O6_3 <sup>#2</sup> | 2.377(2)   |
| Ca1-O5_6 <sup>#1</sup> | 2.3525(19) | Ca3-O5_7               | 2.440(2)   |
| Ca1-S1_12              | 3.4353(11) | Ca3-O6_7               | 2.862(2)   |
| Ca1-S1_9               | 3.4523(11) | Ca3-S1_7               | 3.2237(12) |
| Ca1-S1_4               | 3.4919(13) | Ca3-S1_13              | 3.4514(12) |
| Ca2-O1_2               | 2.283(12)  | Ca3-S1_11              | 3.4669(11) |
| Ca2-O5_4               | 2.2973(19) | O1_1-S1_1              | 1.504(8)   |
| Ca2-O1_1               | 2.320(11)  | S1_1-C1_1              | 1.741(8)   |
| Ca2-O1_10              | 2.3229(19) | S1_1-C2_1              | 1.772(8)   |
| Ca2-O5_8               | 2.341(2)   | C1_1-H1A_1             | 0.9800     |
| Ca2-O6_7               | 2.346(2)   | C1_1-H1B_1             | 0.9800     |
| Ca2-O6_5               | 2.356(2)   | C1_1-H1C_1             | 0.9800     |
| Ca2-S1_5               | 3.4051(13) | C2_1-H2A_1             | 0.9800     |
| Ca2-S1_10              | 3.4339(11) | C2_1-H2B_1             | 0.9800     |
| Ca2-S1_1               | 3.468(7)   | C2_1-H2C_1             | 0.9800     |
| Ca3-O5_5               | 2.291(2)   | O1_2-S1_2              | 1.534(9)   |
|                        |            | S1_2-C2_2              | 1.777(9)   |

|             |            |             |            |
|-------------|------------|-------------|------------|
| S1_2-C1_2   | 1.788(8)   | C1_4-C2_4   | 1.387(3)   |
| C1_2-H1A_2  | 0.9800     | C1_4-C6_4   | 1.393(4)   |
| C1_2-H1B_2  | 0.9800     | C2_4-C3_4   | 1.387(4)   |
| C1_2-H1C_2  | 0.9800     | C2_4-H2_4   | 0.9500     |
| C2_2-H2A_2  | 0.9800     | C3_4-C4_4   | 1.397(4)   |
| C2_2-H2B_2  | 0.9800     | C3_4-H3_4   | 0.9500     |
| C2_2-H2C_2  | 0.9800     | C4_4-C5_4   | 1.398(4)   |
| C11_3-C12_3 | 1.738(3)   | C4_4-H4_4   | 0.9500     |
| O1_3-C7_3   | 1.364(3)   | C5_4-C6_4   | 1.375(4)   |
| O1_3-C6_3   | 1.386(3)   | C5_4-H5_4   | 0.9500     |
| S1_3-O3_3   | 1.4380(19) | C7_4-C8_4   | 1.445(4)   |
| S1_3-O5_3   | 1.4490(19) | C8_4-C9_4   | 1.402(3)   |
| S1_3-O6_3   | 1.456(2)   | C8_4-C13_4  | 1.414(4)   |
| S1_3-C10_3  | 1.776(2)   | C9_4-C10_4  | 1.380(3)   |
| O2_3-C13_3  | 1.343(3)   | C9_4-H9_4   | 0.9500     |
| O2_3-H2A_3  | 0.78(3)    | C10_4-C11_4 | 1.399(3)   |
| N1_3-C7_3   | 1.302(3)   | C11_4-C12_4 | 1.375(3)   |
| N1_3-C1_3   | 1.403(3)   | C11_4-H11_4 | 0.9500     |
| C1_3-C6_3   | 1.385(4)   | C12_4-C13_4 | 1.403(3)   |
| C1_3-C2_3   | 1.391(3)   | C11_5-C12_5 | 1.737(3)   |
| C2_3-C3_3   | 1.390(4)   | O1_5-C7_5   | 1.366(3)   |
| C2_3-H2_3   | 0.9500     | O1_5-C6_5   | 1.383(3)   |
| C3_3-C4_3   | 1.394(4)   | S1_5-O3_5   | 1.4409(19) |
| C3_3-H3_3   | 0.9500     | S1_5-O5_5   | 1.441(2)   |
| C4_3-C5_3   | 1.388(4)   | S1_5-O6_5   | 1.460(2)   |
| C4_3-H4_3   | 0.9500     | S1_5-C10_5  | 1.765(3)   |
| C5_3-C6_3   | 1.383(4)   | O2_5-C13_5  | 1.345(3)   |
| C5_3-H5_3   | 0.9500     | O2_5-H2A_5  | 0.85(3)    |
| C7_3-C8_3   | 1.449(3)   | N1_5-C7_5   | 1.302(3)   |
| C8_3-C9_3   | 1.396(3)   | N1_5-C1_5   | 1.406(3)   |
| C8_3-C13_3  | 1.417(4)   | C1_5-C6_5   | 1.389(4)   |
| C9_3-C10_3  | 1.385(3)   | C1_5-C2_5   | 1.399(3)   |
| C9_3-H9_3   | 0.9500     | C2_5-C3_5   | 1.379(4)   |
| C10_3-C11_3 | 1.396(3)   | C2_5-H2_5   | 0.9500     |
| C11_3-C12_3 | 1.380(3)   | C3_5-C4_5   | 1.400(4)   |
| C11_3-H11_3 | 0.9500     | C3_5-H3_5   | 0.9500     |
| C12_3-C13_3 | 1.402(4)   | C4_5-C5_5   | 1.392(4)   |
| C11_4-C12_4 | 1.737(3)   | C4_5-H4_5   | 0.9500     |
| O1_4-C7_4   | 1.369(3)   | C5_5-C6_5   | 1.378(4)   |
| O1_4-C6_4   | 1.388(3)   | C5_5-H5_5   | 0.9500     |
| S1_4-O3_4   | 1.4421(19) | C7_5-C8_5   | 1.451(3)   |
| S1_4-O5_4   | 1.4511(19) | C8_5-C9_5   | 1.396(3)   |
| S1_4-O6_4   | 1.4581(19) | C8_5-C13_5  | 1.411(4)   |
| S1_4-C10_4  | 1.775(3)   | C9_5-C10_5  | 1.377(3)   |
| O2_4-C13_4  | 1.344(3)   | C9_5-H9_5   | 0.9500     |
| O2_4-H2A_4  | 0.83(3)    | C10_5-C11_5 | 1.398(3)   |
| N1_4-C7_4   | 1.301(3)   | C11_5-C12_5 | 1.383(3)   |
| N1_4-C1_4   | 1.402(3)   | C11_5-H11_5 | 0.9500     |

|             |            |             |            |
|-------------|------------|-------------|------------|
| C12_5-C13_5 | 1.401(4)   | C4_7-C5_7   | 1.386(4)   |
| C11_6-C12_6 | 1.736(3)   | C4_7-H4_7   | 0.9500     |
| O1_6-C7_6   | 1.368(3)   | C5_7-C6_7   | 1.379(4)   |
| O1_6-C6_6   | 1.386(3)   | C5_7-H5_7   | 0.9500     |
| S1_6-O3_6   | 1.4424(19) | C7_7-C8_7   | 1.448(4)   |
| S1_6-O6_6   | 1.4579(19) | C8_7-C9_7   | 1.393(3)   |
| S1_6-O5_6   | 1.4609(19) | C8_7-C13_7  | 1.411(3)   |
| S1_6-C10_6  | 1.769(3)   | C9_7-C10_7  | 1.373(3)   |
| O2_6-C13_6  | 1.342(3)   | C9_7-H9_7   | 0.9500     |
| O2_6-H2A_6  | 0.82(3)    | C10_7-C11_7 | 1.403(3)   |
| N1_6-C7_6   | 1.305(3)   | C11_7-C12_7 | 1.388(3)   |
| N1_6-C1_6   | 1.402(3)   | C11_7-H11_7 | 0.9500     |
| C1_6-C6_6   | 1.381(4)   | C12_7-C13_7 | 1.404(3)   |
| C1_6-C2_6   | 1.399(3)   | C11_8-C12_8 | 1.731(3)   |
| C2_6-C3_6   | 1.388(4)   | O1_8-C7_8   | 1.376(3)   |
| C2_6-H2_6   | 0.9500     | O1_8-C6_8   | 1.385(3)   |
| C3_6-C4_6   | 1.402(4)   | S1_8-O3_8   | 1.441(2)   |
| C3_6-H3_6   | 0.9500     | S1_8-O6_8   | 1.4486(19) |
| C4_6-C5_6   | 1.381(4)   | S1_8-O5_8   | 1.4585(19) |
| C4_6-H4_6   | 0.9500     | S1_8-C10_8  | 1.767(3)   |
| C5_6-C6_6   | 1.381(4)   | O2_8-C13_8  | 1.340(3)   |
| C5_6-H5_6   | 0.9500     | O2_8-H2A_8  | 0.80(3)    |
| C7_6-C8_6   | 1.451(3)   | N1_8-C7_8   | 1.306(3)   |
| C8_6-C9_6   | 1.395(3)   | N1_8-C1_8   | 1.403(3)   |
| C8_6-C13_6  | 1.403(3)   | C1_8-C6_8   | 1.390(4)   |
| C9_6-C10_6  | 1.387(3)   | C1_8-C2_8   | 1.393(4)   |
| C9_6-H9_6   | 0.9500     | C2_8-C3_8   | 1.381(4)   |
| C10_6-C11_6 | 1.402(3)   | C2_8-H2_8   | 0.9500     |
| C11_6-C12_6 | 1.386(3)   | C3_8-C4_8   | 1.396(4)   |
| C11_6-H11_6 | 0.9500     | C3_8-H3_8   | 0.9500     |
| C12_6-C13_6 | 1.404(3)   | C4_8-C5_8   | 1.391(4)   |
| C11_7-C12_7 | 1.731(3)   | C4_8-H4_8   | 0.9500     |
| O1_7-C7_7   | 1.369(3)   | C5_8-C6_8   | 1.379(4)   |
| O1_7-C6_7   | 1.390(3)   | C5_8-H5_8   | 0.9500     |
| S1_7-O3_7   | 1.4348(19) | C7_8-C8_8   | 1.448(4)   |
| S1_7-O5_7   | 1.4558(19) | C8_8-C9_8   | 1.392(3)   |
| S1_7-O6_7   | 1.4626(19) | C8_8-C13_8  | 1.411(3)   |
| S1_7-C10_7  | 1.770(3)   | C9_8-C10_8  | 1.379(4)   |
| O2_7-C13_7  | 1.342(3)   | C9_8-H9_8   | 0.9500     |
| O2_7-H2A_7  | 0.87(3)    | C10_8-C11_8 | 1.399(3)   |
| N1_7-C7_7   | 1.306(3)   | C11_8-C12_8 | 1.391(3)   |
| N1_7-C1_7   | 1.405(3)   | C11_8-H11_8 | 0.9500     |
| C1_7-C6_7   | 1.385(4)   | C12_8-C13_8 | 1.406(4)   |
| C1_7-C2_7   | 1.391(4)   | O1_9-S1_9   | 1.5230(19) |
| C2_7-C3_7   | 1.388(4)   | S1_9-C2_9   | 1.771(3)   |
| C2_7-H2_7   | 0.9500     | S1_9-C1_9   | 1.793(3)   |
| C3_7-C4_7   | 1.403(4)   | C1_9-H1A_9  | 0.9800     |
| C3_7-H3_7   | 0.9500     | C1_9-H1B_9  | 0.9800     |

|              |            |
|--------------|------------|
| C1_9-H1C_9   | 0.9800     |
| C2_9-H2A_9   | 0.9800     |
| C2_9-H2B_9   | 0.9800     |
| C2_9-H2C_9   | 0.9800     |
| O1_10-S1_10  | 1.5216(19) |
| S1_10-C2_10  | 1.779(3)   |
| S1_10-C1_10  | 1.789(3)   |
| C1_10-H1A_10 | 0.9800     |
| C1_10-H1B_10 | 0.9800     |
| C1_10-H1C_10 | 0.9800     |
| C2_10-H2A_10 | 0.9800     |
| C2_10-H2B_10 | 0.9800     |
| C2_10-H2C_10 | 0.9800     |
| O1_11-S1_11  | 1.5273(19) |
| S1_11-C2_11  | 1.777(3)   |
| S1_11-C1_11  | 1.784(3)   |
| C1_11-H1A_11 | 0.9800     |
| C1_11-H1B_11 | 0.9800     |
| C1_11-H1C_11 | 0.9800     |
| C2_11-H2A_11 | 0.9800     |
| C2_11-H2B_11 | 0.9800     |
| C2_11-H2C_11 | 0.9800     |
| O1_12-S1_12  | 1.521(2)   |
| S1_12-C2_12  | 1.758(3)   |
| S1_12-C1_12  | 1.780(3)   |
| C1_12-H1A_12 | 0.9800     |
| C1_12-H1B_12 | 0.9800     |
| C1_12-H1C_12 | 0.9800     |
| C2_12-H2A_12 | 0.9800     |
| C2_12-H2B_12 | 0.9800     |
| C2_12-H2C_12 | 0.9800     |
| O1_13-S1_13  | 1.518(2)   |
| S1_13-C1_13  | 1.772(3)   |
| S1_13-C2_13  | 1.779(3)   |
| C1_13-H1A_13 | 0.9800     |
| C1_13-H1B_13 | 0.9800     |
| C1_13-H1C_13 | 0.9800     |
| C2_13-H2A_13 | 0.9800     |
| C2_13-H2B_13 | 0.9800     |
| C2_13-H2C_13 | 0.9800     |
| O1_14-S1_14  | 1.542(14)  |
| S1_14-C1_14  | 1.759(14)  |
| S1_14-C2_14  | 1.767(14)  |
| C1_14-H1A_14 | 0.9800     |
| C1_14-H1B_14 | 0.9800     |
| C1_14-H1C_14 | 0.9800     |
| C2_14-H2A_14 | 0.9800     |
| C2_14-H2B_14 | 0.9800     |

|              |        |
|--------------|--------|
| C2_14-H2C_14 | 0.9800 |
|--------------|--------|

| <b>Atom-Atom-Atom</b>         | <b>Angle [°]</b> |
|-------------------------------|------------------|
| O5_3-Ca1-O6_8                 | 168.99(7)        |
| O5_3-Ca1-O1_9                 | 97.31(7)         |
| O6_8-Ca1-O1_9                 | 93.70(7)         |
| O5_3-Ca1-O1_12                | 84.10(7)         |
| O6_8-Ca1-O1_12                | 84.93(7)         |
| O1_9-Ca1-O1_12                | 174.95(7)        |
| O5_3-Ca1-O6_4                 | 81.83(7)         |
| O6_8-Ca1-O6_4                 | 98.92(7)         |
| O1_9-Ca1-O6_4                 | 86.05(7)         |
| O1_12-Ca1-O6_4                | 89.36(7)         |
| O5_3-Ca1-O5_6 <sup>#1</sup>   | 97.28(7)         |
| O6_8-Ca1-O5_6 <sup>#1</sup>   | 83.08(7)         |
| O1_9-Ca1-O5_6 <sup>#1</sup>   | 88.28(7)         |
| O1_12-Ca1-O5_6 <sup>#1</sup>  | 96.36(7)         |
| O6_4-Ca1-O5_6 <sup>#1</sup>   | 174.10(7)        |
| O5_3-Ca1-S1_12                | 105.05(5)        |
| O6_8-Ca1-S1_12                | 63.94(5)         |
| O1_9-Ca1-S1_12                | 157.63(5)        |
| O1_12-Ca1-S1_12               | 21.37(5)         |
| O6_4-Ca1-S1_12                | 96.36(5)         |
| O5_6 <sup>#1</sup> -Ca1-S1_12 | 89.51(5)         |
| O5_3-Ca1-S1_9                 | 91.53(5)         |
| O6_8-Ca1-S1_9                 | 98.79(6)         |
| O1_9-Ca1-S1_9                 | 20.70(4)         |
| O1_12-Ca1-S1_9                | 154.85(5)        |
| O6_4-Ca1-S1_9                 | 65.49(5)         |
| O5_6 <sup>#1</sup> -Ca1-S1_9  | 108.77(5)        |
| S1_12-Ca1-S1_9                | 153.73(3)        |
| O5_3-Ca1-S1_4                 | 97.36(5)         |
| O6_8-Ca1-S1_4                 | 81.88(6)         |
| O1_9-Ca1-S1_4                 | 93.34(5)         |
| O1_12-Ca1-S1_4                | 81.66(5)         |
| O6_4-Ca1-S1_4                 | 18.15(5)         |
| O5_6 <sup>#1</sup> -Ca1-S1_4  | 164.94(5)        |
| S1_12-Ca1-S1_4                | 83.30(3)         |
| S1_9-Ca1-S1_4                 | 74.33(2)         |
| O1_2-Ca2-O5_4                 | 84.3(4)          |
| O5_4-Ca2-O1_1                 | 85.4(3)          |
| O1_2-Ca2-O1_10                | 179.0(4)         |
| O5_4-Ca2-O1_10                | 94.67(7)         |
| O1_1-Ca2-O1_10                | 173.9(3)         |
| O1_2-Ca2-O5_8                 | 94.5(3)          |
| O5_4-Ca2-O5_8                 | 95.91(7)         |
| O1_1-Ca2-O5_8                 | 100.6(3)         |
| O1_10-Ca2-O5_8                | 85.47(7)         |

|                              |            |                               |           |
|------------------------------|------------|-------------------------------|-----------|
| O1_2-Ca2-O6_7                | 88.9(4)    | O1_11-Ca3-O5_7                | 87.58(7)  |
| O5_4-Ca2-O6_7                | 173.16(7)  | O6_6-Ca3-O5_7                 | 78.10(7)  |
| O1_1-Ca2-O6_7                | 87.7(3)    | O1_14-Ca3-O5_7                | 104.6(6)  |
| O1_10-Ca2-O6_7               | 92.14(7)   | O1_13-Ca3-O5_7                | 93.99(8)  |
| O5_8-Ca2-O6_7                | 85.38(7)   | O6_3 <sup>#2</sup> -Ca3-O5_7  | 162.87(7) |
| O1_2-Ca2-O6_5                | 93.4(3)    | O5_5-Ca3-O6_7                 | 67.34(7)  |
| O5_4-Ca2-O6_5                | 80.11(7)   | O1_11-Ca3-O6_7                | 87.26(7)  |
| O1_1-Ca2-O6_5                | 87.4(3)    | O6_6-Ca3-O6_7                 | 130.27(7) |
| O1_10-Ca2-O6_5               | 86.57(7)   | O1_14-Ca3-O6_7                | 109.8(7)  |
| O5_8-Ca2-O6_5                | 170.79(7)  | O1_13-Ca3-O6_7                | 94.00(8)  |
| O6_7-Ca2-O6_5                | 99.57(7)   | O6_3 <sup>#2</sup> -Ca3-O6_7  | 142.43(6) |
| O1_2-Ca2-S1_5                | 84.4(3)    | O5_7-Ca3-O6_7                 | 52.24(6)  |
| O5_4-Ca2-S1_5                | 97.69(5)   | O5_5-Ca3-S1_7                 | 94.14(6)  |
| O1_1-Ca2-S1_5                | 78.1(3)    | O1_11-Ca3-S1_7                | 87.65(5)  |
| O1_10-Ca2-S1_5               | 95.85(5)   | O6_6-Ca3-S1_7                 | 103.30(5) |
| O5_8-Ca2-S1_5                | 166.18(5)  | O1_14-Ca3-S1_7                | 108.6(6)  |
| O6_7-Ca2-S1_5                | 80.83(5)   | O1_13-Ca3-S1_7                | 93.93(7)  |
| O6_5-Ca2-S1_5                | 20.65(5)   | O6_3 <sup>#2</sup> -Ca3-S1_7  | 167.79(5) |
| O1_2-Ca2-S1_10               | 158.8(3)   | O5_7-Ca3-S1_7                 | 25.27(4)  |
| O5_4-Ca2-S1_10               | 92.73(5)   | O6_7-Ca3-S1_7                 | 26.98(4)  |
| O1_1-Ca2-S1_10               | 152.7(3)   | O5_5-Ca3-S1_13                | 105.45(6) |
| O1_10-Ca2-S1_10              | 21.21(5)   | O1_11-Ca3-S1_13               | 159.38(6) |
| O5_8-Ca2-S1_10               | 106.68(5)  | O6_6-Ca3-S1_13                | 66.10(5)  |
| O6_7-Ca2-S1_10               | 93.33(5)   | O1_13-Ca3-S1_13               | 20.97(6)  |
| O6_5-Ca2-S1_10               | 65.48(5)   | O6_3 <sup>#2</sup> -Ca3-S1_13 | 97.63(6)  |
| S1_5-Ca2-S1_10               | 75.17(3)   | O5_7-Ca3-S1_13                | 84.04(5)  |
| O5_4-Ca2-S1_1                | 100.62(11) | O6_7-Ca3-S1_13                | 102.20(5) |
| O1_1-Ca2-S1_1                | 19.7(3)    | S1_7-Ca3-S1_13                | 92.64(3)  |
| O1_10-Ca2-S1_1               | 163.40(12) | O5_5-Ca3-S1_11                | 88.23(6)  |
| O5_8-Ca2-S1_1                | 86.54(11)  | O1_11-Ca3-S1_11               | 20.35(5)  |
| O6_7-Ca2-S1_1                | 72.72(11)  | O6_6-Ca3-S1_11                | 94.24(5)  |
| O6_5-Ca2-S1_1                | 102.32(12) | O1_14-Ca3-S1_11               | 144.1(6)  |
| S1_5-Ca2-S1_1                | 88.53(10)  | O1_13-Ca3-S1_11               | 158.04(7) |
| S1_10-Ca2-S1_1               | 160.22(9)  | O6_3 <sup>#2</sup> -Ca3-S1_11 | 64.80(5)  |
| O5_5-Ca3-O1_11               | 95.09(7)   | O5_7-Ca3-S1_11                | 107.62(5) |
| O5_5-Ca3-O6_6                | 160.73(7)  | O6_7-Ca3-S1_11                | 102.25(4) |
| O1_11-Ca3-O6_6               | 93.75(7)   | S1_7-Ca3-S1_11                | 107.27(3) |
| O5_5-Ca3-O1_14               | 89.6(5)    | S1_13-Ca3-S1_11               | 155.11(3) |
| O1_11-Ca3-O1_14              | 162.8(7)   | S1_1-O1_1-Ca2                 | 128.9(7)  |
| O6_6-Ca3-O1_14               | 77.3(6)    | O1_1-S1_1-C1_1                | 106.8(6)  |
| O5_5-Ca3-O1_13               | 84.48(8)   | O1_1-S1_1-C2_1                | 111.2(5)  |
| O1_11-Ca3-O1_13              | 178.38(9)  | C1_1-S1_1-C2_1                | 99.1(5)   |
| O6_6-Ca3-O1_13               | 86.21(8)   | O1_1-S1_1-Ca2                 | 31.4(5)   |
| O5_5-Ca3-O6_3 <sup>#2</sup>  | 76.80(7)   | C1_1-S1_1-Ca2                 | 137.8(4)  |
| O1_11-Ca3-O6_3 <sup>#2</sup> | 85.05(7)   | C2_1-S1_1-Ca2                 | 96.2(3)   |
| O6_6-Ca3-O6_3 <sup>#2</sup>  | 86.96(7)   | S1_1-C1_1-H1A_1               | 109.5     |
| O1_13-Ca3-O6_3 <sup>#2</sup> | 93.33(8)   | S1_1-C1_1-H1B_1               | 109.5     |
| O5_5-Ca3-O5_7                | 119.33(7)  | H1A_1-C1_1-H1B_1              | 109.5     |

|                             |            |                   |            |
|-----------------------------|------------|-------------------|------------|
| S1_1-C1_1-H1C_1             | 109.5      | C6_3-C5_3-C4_3    | 115.4(3)   |
| H1A_1-C1_1-H1C_1            | 109.5      | C6_3-C5_3-H5_3    | 122.3      |
| H1B_1-C1_1-H1C_1            | 109.5      | C4_3-C5_3-H5_3    | 122.3      |
| S1_1-C2_1-H2A_1             | 109.5      | C5_3-C6_3-C1_3    | 123.7(2)   |
| S1_1-C2_1-H2B_1             | 109.5      | C5_3-C6_3-O1_3    | 128.0(2)   |
| H2A_1-C2_1-H2B_1            | 109.5      | C1_3-C6_3-O1_3    | 108.3(2)   |
| S1_1-C2_1-H2C_1             | 109.5      | N1_3-C7_3-O1_3    | 115.6(2)   |
| H2A_1-C2_1-H2C_1            | 109.5      | N1_3-C7_3-C8_3    | 126.1(2)   |
| H2B_1-C2_1-H2C_1            | 109.5      | O1_3-C7_3-C8_3    | 118.3(2)   |
| S1_2-O1_2-Ca2               | 136.2(9)   | C9_3-C8_3-C13_3   | 120.3(2)   |
| O1_2-S1_2-C2_2              | 98.7(7)    | C9_3-C8_3-C7_3    | 121.3(2)   |
| O1_2-S1_2-C1_2              | 104.3(6)   | C13_3-C8_3-C7_3   | 118.3(2)   |
| C2_2-S1_2-C1_2              | 93.4(5)    | C10_3-C9_3-C8_3   | 120.0(2)   |
| S1_2-C1_2-H1A_2             | 109.5      | C10_3-C9_3-H9_3   | 120.0      |
| S1_2-C1_2-H1B_2             | 109.5      | C8_3-C9_3-H9_3    | 120.0      |
| H1A_2-C1_2-H1B_2            | 109.5      | C9_3-C10_3-C11_3  | 120.7(2)   |
| S1_2-C1_2-H1C_2             | 109.5      | C9_3-C10_3-S1_3   | 118.64(19) |
| H1A_2-C1_2-H1C_2            | 109.5      | C11_3-C10_3-S1_3  | 120.65(19) |
| H1B_2-C1_2-H1C_2            | 109.5      | C12_3-C11_3-      | 119.1(2)   |
| S1_2-C2_2-H2A_2             | 109.5      | C10_3             |            |
| S1_2-C2_2-H2B_2             | 109.5      | C12_3-C11_3-      | 120.5      |
| H2A_2-C2_2-H2B_2            | 109.5      | H11_3             |            |
| S1_2-C2_2-H2C_2             | 109.5      | C10_3-C11_3-      | 120.5      |
| H2A_2-C2_2-H2C_2            | 109.5      | H11_3             |            |
| H2B_2-C2_2-H2C_2            | 109.5      | C11_3-C12_3-      | 122.1(2)   |
| C7_3-O1_3-C6_3              | 103.52(19) | C13_3             |            |
| O3_3-S1_3-O5_3              | 114.19(12) | C11_3-C12_3-C11_3 | 119.6(2)   |
| O3_3-S1_3-O6_3              | 112.84(12) | C13_3-C12_3-C11_3 | 118.29(19) |
| O5_3-S1_3-O6_3              | 111.72(11) | O2_3-C13_3-C12_3  | 118.8(2)   |
| O3_3-S1_3-C10_3             | 107.00(12) | O2_3-C13_3-C8_3   | 123.5(2)   |
| O5_3-S1_3-C10_3             | 104.87(12) | C12_3-C13_3-C8_3  | 117.7(2)   |
| O6_3-S1_3-C10_3             | 105.35(11) | C7_4-O1_4-C6_4    | 103.62(19) |
| C13_3-O2_3-H2A_3            | 109.5      | O3_4-S1_4-O5_4    | 114.79(12) |
| C7_3-N1_3-C1_3              | 104.5(2)   | O3_4-S1_4-O6_4    | 112.59(11) |
| S1_3-O5_3-Ca1               | 162.63(12) | O5_4-S1_4-O6_4    | 111.58(11) |
| S1_3-O6_3-Ca3 <sup>#1</sup> | 144.07(12) | O3_4-S1_4-C10_4   | 106.23(11) |
| C6_3-C1_3-C2_3              | 120.7(2)   | O5_4-S1_4-C10_4   | 105.47(12) |
| C6_3-C1_3-N1_3              | 108.1(2)   | O6_4-S1_4-C10_4   | 105.29(11) |
| C2_3-C1_3-N1_3              | 131.2(2)   | O3_4-S1_4-Ca1     | 136.72(8)  |
| C3_3-C2_3-C1_3              | 116.3(2)   | O5_4-S1_4-Ca1     | 82.79(8)   |
| C3_3-C2_3-H2_3              | 121.8      | O6_4-S1_4-Ca1     | 30.10(7)   |
| C1_3-C2_3-H2_3              | 121.8      | C10_4-S1_4-Ca1    | 106.17(8)  |
| C2_3-C3_3-C4_3              | 122.0(2)   | C13_4-O2_4-H2A_4  | 109.5      |
| C2_3-C3_3-H3_3              | 119.0      | C7_4-N1_4-C1_4    | 104.8(2)   |
| C4_3-C3_3-H3_3              | 119.0      | S1_4-O5_4-Ca2     | 155.29(12) |
| C5_3-C4_3-C3_3              | 121.8(3)   | S1_4-O6_4-Ca1     | 131.75(11) |
| C5_3-C4_3-H4_3              | 119.1      | C2_4-C1_4-C6_4    | 120.5(2)   |
| C3_3-C4_3-H4_3              | 119.1      | C2_4-C1_4-N1_4    | 131.5(2)   |



|                   |            |                   |            |
|-------------------|------------|-------------------|------------|
| C6_4-C1_4-N1_4    | 108.1(2)   | O3_5-S1_5-Ca2     | 138.52(9)  |
| C3_4-C2_4-C1_4    | 116.7(2)   | O5_5-S1_5-Ca2     | 78.02(9)   |
| C3_4-C2_4-H2_4    | 121.6      | O6_5-S1_5-Ca2     | 34.69(8)   |
| C1_4-C2_4-H2_4    | 121.6      | C10_5-S1_5-Ca2    | 107.39(9)  |
| C2_4-C3_4-C4_4    | 122.0(2)   | C13_5-O2_5-H2A_5  | 109.5      |
| C2_4-C3_4-H3_4    | 119.0      | C7_5-N1_5-C1_5    | 104.1(2)   |
| C4_4-C3_4-H3_4    | 119.0      | S1_5-O5_5-Ca3     | 166.71(13) |
| C3_4-C4_4-C5_4    | 121.6(3)   | S1_5-O6_5-Ca2     | 124.66(11) |
| C3_4-C4_4-H4_4    | 119.2      | C6_5-C1_5-C2_5    | 120.3(2)   |
| C5_4-C4_4-H4_4    | 119.2      | C6_5-C1_5-N1_5    | 108.4(2)   |
| C6_4-C5_4-C4_4    | 115.3(3)   | C2_5-C1_5-N1_5    | 131.2(2)   |
| C6_4-C5_4-H5_4    | 122.4      | C3_5-C2_5-C1_5    | 116.5(2)   |
| C4_4-C5_4-H5_4    | 122.4      | C3_5-C2_5-H2_5    | 121.7      |
| C5_4-C6_4-O1_4    | 128.1(2)   | C1_5-C2_5-H2_5    | 121.7      |
| C5_4-C6_4-C1_4    | 123.9(2)   | C2_5-C3_5-C4_5    | 122.4(2)   |
| O1_4-C6_4-C1_4    | 108.0(2)   | C2_5-C3_5-H3_5    | 118.8      |
| N1_4-C7_4-O1_4    | 115.5(2)   | C4_5-C3_5-H3_5    | 118.8      |
| N1_4-C7_4-C8_4    | 126.2(2)   | C5_5-C4_5-C3_5    | 121.3(3)   |
| O1_4-C7_4-C8_4    | 118.3(2)   | C5_5-C4_5-H4_5    | 119.4      |
| C9_4-C8_4-C13_4   | 119.8(2)   | C3_5-C4_5-H4_5    | 119.4      |
| C9_4-C8_4-C7_4    | 121.3(2)   | C6_5-C5_5-C4_5    | 115.6(2)   |
| C13_4-C8_4-C7_4   | 118.9(2)   | C6_5-C5_5-H5_5    | 122.2      |
| C10_4-C9_4-C8_4   | 120.2(2)   | C4_5-C5_5-H5_5    | 122.2      |
| C10_4-C9_4-H9_4   | 119.9      | C5_5-C6_5-O1_5    | 128.3(2)   |
| C8_4-C9_4-H9_4    | 119.9      | C5_5-C6_5-C1_5    | 123.8(2)   |
| C9_4-C10_4-C11_4  | 120.8(2)   | O1_5-C6_5-C1_5    | 107.9(2)   |
| C9_4-C10_4-S1_4   | 118.34(19) | N1_5-C7_5-O1_5    | 115.8(2)   |
| C11_4-C10_4-S1_4  | 120.81(19) | N1_5-C7_5-C8_5    | 126.1(2)   |
| C12_4-C11_4-      | 118.9(2)   | O1_5-C7_5-C8_5    | 118.1(2)   |
| C10_4             |            | C9_5-C8_5-C13_5   | 120.2(2)   |
| C12_4-C11_4-      | 120.6      | C9_5-C8_5-C7_5    | 120.5(2)   |
| H11_4             |            | C13_5-C8_5-C7_5   | 119.3(2)   |
| C10_4-C11_4-      | 120.6      | C10_5-C9_5-C8_5   | 120.2(2)   |
| H11_4             |            | C10_5-C9_5-H9_5   | 119.9      |
| C11_4-C12_4-      | 122.2(2)   | C8_5-C9_5-H9_5    | 119.9      |
| C13_4             |            | C9_5-C10_5-C11_5  | 120.8(2)   |
| C11_4-C12_4-C11_4 | 119.9(2)   | C9_5-C10_5-S1_5   | 118.7(2)   |
| C13_4-C12_4-C11_4 | 117.87(19) | C11_5-C10_5-S1_5  | 120.56(19) |
| O2_4-C13_4-C12_4  | 119.0(2)   | C12_5-C11_5-      | 118.9(2)   |
| O2_4-C13_4-C8_4   | 122.9(2)   | C10_5             |            |
| C12_4-C13_4-C8_4  | 118.1(2)   | C12_5-C11_5-      | 120.6      |
| C7_5-O1_5-C6_5    | 103.79(19) | H11_5             |            |
| O3_5-S1_5-O5_5    | 114.70(12) | C10_5-C11_5-      | 120.6      |
| O3_5-S1_5-O6_5    | 112.28(12) | H11_5             |            |
| O5_5-S1_5-O6_5    | 111.53(12) | C11_5-C12_5-      | 121.9(2)   |
| O3_5-S1_5-C10_5   | 106.43(12) | C13_5             |            |
| O5_5-S1_5-C10_5   | 105.62(12) | C11_5-C12_5-C11_5 | 119.5(2)   |
| O6_5-S1_5-C10_5   | 105.47(12) | C13_5-C12_5-C11_5 | 118.60(19) |

|                             |            |                   |            |
|-----------------------------|------------|-------------------|------------|
| O2_5-C13_5-C12_5            | 119.1(2)   | C10_6-C11_6-      | 120.4      |
| O2_5-C13_5-C8_5             | 122.9(2)   | H11_6             |            |
| C12_5-C13_5-C8_5            | 118.0(2)   | C11_6-C12_6-      | 121.8(2)   |
| C7_6-O1_6-C6_6              | 103.91(19) | C13_6             |            |
| O3_6-S1_6-O6_6              | 113.15(12) | C11_6-C12_6-Cl1_6 | 119.7(2)   |
| O3_6-S1_6-O5_6              | 113.74(11) | C13_6-C12_6-Cl1_6 | 118.42(19) |
| O6_6-S1_6-O5_6              | 110.97(11) | O2_6-C13_6-C8_6   | 123.7(2)   |
| O3_6-S1_6-C10_6             | 106.06(11) | O2_6-C13_6-C12_6  | 118.3(2)   |
| O6_6-S1_6-C10_6             | 106.90(11) | C8_6-C13_6-C12_6  | 118.0(2)   |
| O5_6-S1_6-C10_6             | 105.34(11) | C7_7-O1_7-C6_7    | 103.60(19) |
| C13_6-O2_6-H2A_6            | 109.5      | O3_7-S1_7-O5_7    | 115.09(12) |
| C7_6-N1_6-C1_6              | 104.3(2)   | O3_7-S1_7-O6_7    | 114.38(12) |
| S1_6-O5_6-Ca1 <sup>#2</sup> | 135.32(11) | O5_7-S1_7-O6_7    | 108.23(12) |
| S1_6-O6_6-Ca3               | 153.99(12) | O3_7-S1_7-C10_7   | 106.13(12) |
| C6_6-C1_6-C2_6              | 120.2(2)   | O5_7-S1_7-C10_7   | 106.07(12) |
| C6_6-C1_6-N1_6              | 108.7(2)   | O6_7-S1_7-C10_7   | 106.24(12) |
| C2_6-C1_6-N1_6              | 131.1(2)   | O3_7-S1_7-Ca3     | 133.58(8)  |
| C3_6-C2_6-C1_6              | 116.6(2)   | O5_7-S1_7-Ca3     | 45.67(8)   |
| C3_6-C2_6-H2_6              | 121.7      | O6_7-S1_7-Ca3     | 62.59(8)   |
| C1_6-C2_6-H2_6              | 121.7      | C10_7-S1_7-Ca3    | 119.39(9)  |
| C2_6-C3_6-C4_6              | 121.7(2)   | C13_7-O2_7-H2A_7  | 109.5      |
| C2_6-C3_6-H3_6              | 119.2      | C7_7-N1_7-C1_7    | 104.3(2)   |
| C4_6-C3_6-H3_6              | 119.2      | S1_7-O5_7-Ca3     | 109.07(10) |
| C5_6-C4_6-C3_6              | 122.0(2)   | S1_7-O6_7-Ca2     | 141.80(12) |
| C5_6-C4_6-H4_6              | 119.0      | S1_7-O6_7-Ca3     | 90.43(9)   |
| C3_6-C4_6-H4_6              | 119.0      | Ca2-O6_7-Ca3      | 127.32(8)  |
| C6_6-C5_6-C4_6              | 115.3(2)   | C6_7-C1_7-C2_7    | 120.1(2)   |
| C6_6-C5_6-H5_6              | 122.3      | C6_7-C1_7-N1_7    | 108.6(2)   |
| C4_6-C5_6-H5_6              | 122.3      | C2_7-C1_7-N1_7    | 131.3(2)   |
| C5_6-C6_6-C1_6              | 124.2(2)   | C3_7-C2_7-C1_7    | 116.9(2)   |
| C5_6-C6_6-O1_6              | 127.9(2)   | C3_7-C2_7-H2_7    | 121.6      |
| C1_6-C6_6-O1_6              | 107.9(2)   | C1_7-C2_7-H2_7    | 121.6      |
| N1_6-C7_6-O1_6              | 115.2(2)   | C2_7-C3_7-C4_7    | 121.5(3)   |
| N1_6-C7_6-C8_6              | 126.3(2)   | C2_7-C3_7-H3_7    | 119.3      |
| O1_6-C7_6-C8_6              | 118.5(2)   | C4_7-C3_7-H3_7    | 119.3      |
| C9_6-C8_6-C13_6             | 120.7(2)   | C5_7-C4_7-C3_7    | 122.2(3)   |
| C9_6-C8_6-C7_6              | 120.5(2)   | C5_7-C4_7-H4_7    | 118.9      |
| C13_6-C8_6-C7_6             | 118.8(2)   | C3_7-C4_7-H4_7    | 118.9      |
| C10_6-C9_6-C8_6             | 120.3(2)   | C6_7-C5_7-C4_7    | 114.9(3)   |
| C10_6-C9_6-H9_6             | 119.9      | C6_7-C5_7-H5_7    | 122.6      |
| C8_6-C9_6-H9_6              | 119.9      | C4_7-C5_7-H5_7    | 122.6      |
| C9_6-C10_6-C11_6            | 120.0(2)   | C5_7-C6_7-C1_7    | 124.5(2)   |
| C9_6-C10_6-S1_6             | 119.06(19) | C5_7-C6_7-O1_7    | 127.4(2)   |
| C11_6-C10_6-S1_6            | 120.89(19) | C1_7-C6_7-O1_7    | 108.0(2)   |
| C12_6-C11_6-                | 119.2(2)   | N1_7-C7_7-O1_7    | 115.5(2)   |
| C10_6                       |            | N1_7-C7_7-C8_7    | 126.4(2)   |
| C12_6-C11_6-                | 120.4      | O1_7-C7_7-C8_7    | 118.1(2)   |
| H11_6                       |            | C9_7-C8_7-C13_7   | 120.3(2)   |

|                   |            |                   |            |
|-------------------|------------|-------------------|------------|
| C9_7-C8_7-C7_7    | 121.1(2)   | C5_8-C6_8-C1_8    | 124.4(2)   |
| C13_7-C8_7-C7_7   | 118.6(2)   | O1_8-C6_8-C1_8    | 108.0(2)   |
| C10_7-C9_7-C8_7   | 120.4(2)   | N1_8-C7_8-O1_8    | 115.1(2)   |
| C10_7-C9_7-H9_7   | 119.8      | N1_8-C7_8-C8_8    | 126.7(2)   |
| C8_7-C9_7-H9_7    | 119.8      | O1_8-C7_8-C8_8    | 118.2(2)   |
| C9_7-C10_7-C11_7  | 120.8(2)   | C9_8-C8_8-C13_8   | 120.4(2)   |
| C9_7-C10_7-S1_7   | 119.9(2)   | C9_8-C8_8-C7_8    | 120.7(2)   |
| C11_7-C10_7-S1_7  | 119.29(19) | C13_8-C8_8-C7_8   | 118.8(2)   |
| C12_7-C11_7-      | 118.8(2)   | C10_8-C9_8-C8_8   | 120.6(2)   |
| C10_7             |            | C10_8-C9_8-H9_8   | 119.7      |
| C12_7-C11_7-      | 120.6      | C8_8-C9_8-H9_8    | 119.7      |
| H11_7             |            | C9_8-C10_8-C11_8  | 120.5(2)   |
| C10_7-C11_7-      | 120.6      | C9_8-C10_8-S1_8   | 118.59(19) |
| H11_7             |            | C11_8-C10_8-S1_8  | 121.0(2)   |
| C11_7-C12_7-      | 121.6(2)   | C12_8-C11_8-      | 119.0(2)   |
| C13_7             |            | C10_8             |            |
| C11_7-C12_7-C11_7 | 119.5(2)   | C12_8-C11_8-      | 120.5      |
| C13_7-C12_7-C11_7 | 118.86(19) | H11_8             |            |
| O2_7-C13_7-C12_7  | 118.4(2)   | C10_8-C11_8-      | 120.5      |
| O2_7-C13_7-C8_7   | 123.6(2)   | H11_8             |            |
| C12_7-C13_7-C8_7  | 118.1(2)   | C11_8-C12_8-      | 121.8(2)   |
| C7_8-O1_8-C6_8    | 103.80(19) | C13_8             |            |
| O3_8-S1_8-O6_8    | 112.88(13) | C11_8-C12_8-C11_8 | 119.9(2)   |
| O3_8-S1_8-O5_8    | 113.19(12) | C13_8-C12_8-C11_8 | 118.34(19) |
| O6_8-S1_8-O5_8    | 111.41(12) | O2_8-C13_8-C12_8  | 118.8(2)   |
| O3_8-S1_8-C10_8   | 105.98(12) | O2_8-C13_8-C8_8   | 123.4(2)   |
| O6_8-S1_8-C10_8   | 106.66(12) | C12_8-C13_8-C8_8  | 117.8(2)   |
| O5_8-S1_8-C10_8   | 106.11(12) | S1_9-O1_9-Ca1     | 126.74(10) |
| C13_8-O2_8-H2A_8  | 109.5      | O1_9-S1_9-C2_9    | 105.04(13) |
| C7_8-N1_8-C1_8    | 104.5(2)   | O1_9-S1_9-C1_9    | 104.46(12) |
| S1_8-O5_8-Ca2     | 136.69(11) | C2_9-S1_9-C1_9    | 98.14(14)  |
| S1_8-O6_8-Ca1     | 160.33(12) | O1_9-S1_9-Ca1     | 32.56(7)   |
| C6_8-C1_8-C2_8    | 119.8(2)   | C2_9-S1_9-Ca1     | 109.22(10) |
| C6_8-C1_8-N1_8    | 108.5(2)   | C1_9-S1_9-Ca1     | 133.05(10) |
| C2_8-C1_8-N1_8    | 131.7(2)   | S1_9-C1_9-H1A_9   | 109.5      |
| C3_8-C2_8-C1_8    | 117.0(2)   | S1_9-C1_9-H1B_9   | 109.5      |
| C3_8-C2_8-H2_8    | 121.5      | H1A_9-C1_9-H1B_9  | 109.5      |
| C1_8-C2_8-H2_8    | 121.5      | S1_9-C1_9-H1C_9   | 109.5      |
| C2_8-C3_8-C4_8    | 122.0(3)   | H1A_9-C1_9-H1C_9  | 109.5      |
| C2_8-C3_8-H3_8    | 119.0      | H1B_9-C1_9-H1C_9  | 109.5      |
| C4_8-C3_8-H3_8    | 119.0      | S1_9-C2_9-H2A_9   | 109.5      |
| C5_8-C4_8-C3_8    | 121.8(3)   | S1_9-C2_9-H2B_9   | 109.5      |
| C5_8-C4_8-H4_8    | 119.1      | H2A_9-C2_9-H2B_9  | 109.5      |
| C3_8-C4_8-H4_8    | 119.1      | S1_9-C2_9-H2C_9   | 109.5      |
| C6_8-C5_8-C4_8    | 115.0(3)   | H2A_9-C2_9-H2C_9  | 109.5      |
| C6_8-C5_8-H5_8    | 122.5      | H2B_9-C2_9-H2C_9  | 109.5      |
| C4_8-C5_8-H5_8    | 122.5      | S1_10-O1_10-Ca2   | 125.26(11) |
| C5_8-C6_8-O1_8    | 127.5(2)   |                   |            |

|                         |            |                         |            |
|-------------------------|------------|-------------------------|------------|
| O1_10-S1_10-<br>C2_10   | 104.95(13) | H1A_11-C1_11-<br>H1B_11 | 109.5      |
| O1_10-S1_10-<br>C1_10   | 104.31(12) | S1_11-C1_11-<br>H1C_11  | 109.5      |
| C2_10-S1_10-<br>C1_10   | 98.42(15)  | H1A_11-C1_11-<br>H1C_11 | 109.5      |
| O1_10-S1_10-Ca2         | 33.53(7)   | H1B_11-C1_11-<br>H1C_11 | 109.5      |
| C2_10-S1_10-Ca2         | 109.99(10) | S1_11-C2_11-<br>H2A_11  | 109.5      |
| C1_10-S1_10-Ca2         | 133.16(10) | S1_11-C2_11-<br>H2B_11  | 109.5      |
| S1_10-C1_10-<br>H1A_10  | 109.5      | H2A_11-C2_11-<br>H2B_11 | 109.5      |
| S1_10-C1_10-<br>H1B_10  | 109.5      | S1_11-C2_11-<br>H2C_11  | 109.5      |
| H1A_10-C1_10-<br>H1B_10 | 109.5      | H2A_11-C2_11-<br>H2C_11 | 109.5      |
| S1_10-C1_10-<br>H1C_10  | 109.5      | H2B_11-C2_11-<br>H2C_11 | 109.5      |
| H1A_10-C1_10-<br>H1C_10 | 109.5      | S1_12-O1_12-Ca1         | 124.59(11) |
| H1B_10-C1_10-<br>H1C_10 | 109.5      | O1_12-S1_12-<br>C2_12   | 105.30(14) |
| S1_10-C2_10-<br>H2A_10  | 109.5      | O1_12-S1_12-<br>C1_12   | 105.17(13) |
| S1_10-C2_10-<br>H2B_10  | 109.5      | C2_12-S1_12-<br>C1_12   | 99.07(15)  |
| H2A_10-C2_10-<br>H2B_10 | 109.5      | O1_12-S1_12-Ca1         | 34.03(7)   |
| S1_10-C2_10-<br>H2C_10  | 109.5      | C2_12-S1_12-Ca1         | 93.14(10)  |
| H2A_10-C2_10-<br>H2C_10 | 109.5      | C1_12-S1_12-Ca1         | 139.12(11) |
| H2B_10-C2_10-<br>H2C_10 | 109.5      | S1_12-C1_12-<br>H1A_12  | 109.5      |
| S1_11-O1_11-Ca3         | 127.87(11) | S1_12-C1_12-<br>H1B_12  | 109.5      |
| O1_11-S1_11-<br>C2_11   | 104.72(13) | H1A_12-C1_12-<br>H1B_12 | 109.5      |
| O1_11-S1_11-<br>C1_11   | 104.18(12) | S1_12-C1_12-<br>H1C_12  | 109.5      |
| C2_11-S1_11-<br>C1_11   | 98.25(15)  | H1A_12-C1_12-<br>H1C_12 | 109.5      |
| O1_11-S1_11-Ca3         | 31.78(7)   | H1B_12-C1_12-<br>H1C_12 | 109.5      |
| C2_11-S1_11-Ca3         | 107.53(10) | S1_12-C2_12-<br>H2A_12  | 109.5      |
| C1_11-S1_11-Ca3         | 132.89(10) | S1_12-C2_12-<br>H2B_12  | 109.5      |
| S1_11-C1_11-<br>H1A_11  | 109.5      | H2A_12-C2_12-<br>H2B_12 | 109.5      |
| S1_11-C1_11-<br>H1B_11  | 109.5      | H2A_12-C2_12-<br>H2B_12 | 109.5      |

|                         |            |                         |           |
|-------------------------|------------|-------------------------|-----------|
| S1_12–C2_12–<br>H2C_12  | 109.5      | H2A_13–C2_13–<br>H2C_13 | 109.5     |
| H2A_12–C2_12–<br>H2C_12 | 109.5      | H2B_13–C2_13–<br>H2C_13 | 109.5     |
| H2B_12–C2_12–<br>H2C_12 | 109.5      | S1_14–O1_14–Ca3         | 129.4(14) |
| S1_13–O1_13–Ca3         | 125.53(13) | O1_14–S1_14–<br>C1_14   | 106.1(13) |
| O1_13–S1_13–<br>C1_13   | 105.63(15) | O1_14–S1_14–<br>C2_14   | 104.9(13) |
| O1_13–S1_13–<br>C2_13   | 104.49(15) | C1_14–S1_14–<br>C2_14   | 97.4(13)  |
| C1_13–S1_13–<br>C2_13   | 97.78(16)  | S1_14–C1_14–<br>H1A_14  | 109.5     |
| O1_13–S1_13–Ca3         | 33.49(9)   | S1_14–C1_14–<br>H1B_14  | 109.5     |
| C1_13–S1_13–Ca3         | 103.67(11) | H1A_14–C1_14–<br>H1B_14 | 109.5     |
| C2_13–S1_13–Ca3         | 136.67(12) | S1_14–C1_14–<br>H1C_14  | 109.5     |
| S1_13–C1_13–<br>H1A_13  | 109.5      | H1A_14–C1_14–<br>H1C_14 | 109.5     |
| S1_13–C1_13–<br>H1B_13  | 109.5      | H1B_14–C1_14–<br>H1C_14 | 109.5     |
| H1A_13–C1_13–<br>H1B_13 | 109.5      | S1_14–C2_14–<br>H2A_14  | 109.5     |
| S1_13–C1_13–<br>H1C_13  | 109.5      | S1_14–C2_14–<br>H2B_14  | 109.5     |
| H1A_13–C1_13–<br>H1C_13 | 109.5      | H2A_14–C2_14–<br>H2B_14 | 109.5     |
| H1B_13–C1_13–<br>H1C_13 | 109.5      | S1_14–C2_14–<br>H2C_14  | 109.5     |
| S1_13–C2_13–<br>H2A_13  | 109.5      | H2A_14–C2_14–<br>H2C_14 | 109.5     |
| S1_13–C2_13–<br>H2B_13  | 109.5      | H2B_14–C2_14–<br>H2C_14 | 109.5     |
| H2A_13–C2_13–<br>H2B_13 | 109.5      | S1_13–C2_13–<br>H2C_13  | 109.5     |
| S1_13–C2_13–<br>H2C_13  | 109.5      |                         |           |

Symmetry transformations used to generate equivalent atoms:  
#1: -1+X, +Y, +Z; #2: 1+X, +Y, +Z;

**Table S6.** Torsion angles for **4**.

| Atom–Atom–Atom–<br>Atom | Torsion Angle<br>[°] |                                       |             |
|-------------------------|----------------------|---------------------------------------|-------------|
| Ca2–O1_1–S1_1–C1_1      | -172.8(7)            | O3_3–S1_3–O6_3–<br>Ca3 <sup>#1</sup>  | 140.90(18)  |
| Ca2–O1_1–S1_1–C2_1      | -65.6(10)            | O5_3–S1_3–O6_3–<br>Ca3 <sup>#1</sup>  | 10.6(2)     |
| Ca2–O1_2–S1_2–C2_2      | -128.9(10)           | C10_3–S1_3–O6_3–<br>Ca3 <sup>#1</sup> | -102.70(19) |
| Ca2–O1_2–S1_2–C1_2      | 135.4(9)             | C7_3–N1_3–C1_3–C6_3                   | -0.4(3)     |
| O3_3–S1_3–O5_3–Ca1      | -9.9(4)              | C7_3–N1_3–C1_3–C2_3                   | 178.2(3)    |
| O6_3–S1_3–O5_3–Ca1      | 119.7(4)             | C6_3–C1_3–C2_3–C3_3                   | 0.9(4)      |
| C10_3–S1_3–O5_3–Ca1     | -126.7(4)            | N1_3–C1_3–C2_3–C3_3                   | -177.6(3)   |

|                     |             |                     |             |
|---------------------|-------------|---------------------|-------------|
| C1_3-C2_3-C3_3-C4_3 | -2.3(4)     | C10_3-C11_3-C12_3-  | -1.7(4)     |
| C2_3-C3_3-C4_3-C5_3 | 2.0(4)      | C13_3               |             |
| C3_3-C4_3-C5_3-C6_3 | -0.4(4)     | C10_3-C11_3-C12_3-  | 176.23(19)  |
| C4_3-C5_3-C6_3-C1_3 | -1.0(4)     | C1_3                |             |
| C4_3-C5_3-C6_3-O1_3 | 178.1(3)    | C11_3-C12_3-C13_3-  | 178.9(2)    |
| C2_3-C1_3-C6_3-C5_3 | 0.7(4)      | O2_3                |             |
| N1_3-C1_3-C6_3-C5_3 | 179.5(3)    | C1_3-C12_3-C13_3-   | 0.9(3)      |
| C2_3-C1_3-C6_3-O1_3 | -178.5(2)   | O2_3                |             |
| N1_3-C1_3-C6_3-     | 0.2(3)      | C11_3-C12_3-C13_3-  | -1.2(4)     |
| O1_3                |             | C8_3                |             |
| C7_3-O1_3-C6_3-C5_3 | -179.2(3)   | C1_3-C12_3-C13_3-   | -179.19(19) |
| C7_3-O1_3-C6_3-C1_3 | 0.0(3)      | C8_3                |             |
| C1_3-N1_3-C7_3-     | 0.5(3)      | C9_3-C8_3-C13_3-    | -177.4(2)   |
| O1_3                |             | O2_3                |             |
| C1_3-N1_3-C7_3-C8_3 | -179.1(2)   | C7_3-C8_3-C13_3-    | 0.7(4)      |
| C6_3-O1_3-C7_3-     | -0.4(3)     | O2_3                |             |
| N1_3                |             | C9_3-C8_3-C13_3-    | 2.7(4)      |
| C6_3-O1_3-C7_3-C8_3 | 179.3(2)    | C12_3               |             |
| N1_3-C7_3-C8_3-C9_3 | 173.1(3)    | C7_3-C8_3-C13_3-    | -179.2(2)   |
| O1_3-C7_3-C8_3-C9_3 | -6.6(4)     | C12_3               |             |
| N1_3-C7_3-C8_3-     | -5.0(4)     | O3_4-S1_4-O5_4-Ca2  | -2.6(3)     |
| C13_3               |             | O6_4-S1_4-O5_4-Ca2  | 127.0(3)    |
| O1_3-C7_3-C8_3-     | 175.4(2)    | C10_4-S1_4-O5_4-Ca2 | -119.2(3)   |
| C13_3               |             | Ca1-S1_4-O5_4-Ca2   | 136.0(3)    |
| C13_3-C8_3-C9_3-    | -1.2(4)     | O3_4-S1_4-O6_4-Ca1  | 148.72(13)  |
| C10_3               |             | O5_4-S1_4-O6_4-Ca1  | 17.96(17)   |
| C7_3-C8_3-C9_3-     | -179.2(2)   | C10_4-S1_4-O6_4-Ca1 | -95.97(15)  |
| C10_3               |             | C7_4-N1_4-C1_4-C2_4 | 178.8(3)    |
| C8_3-C9_3-C10_3-    | -1.9(4)     | C7_4-N1_4-C1_4-C6_4 | 0.1(3)      |
| C11_3               |             | C6_4-C1_4-C2_4-C3_4 | 0.0(4)      |
| C8_3-C9_3-C10_3-    | 177.33(19)  | N1_4-C1_4-C2_4-C3_4 | -178.6(3)   |
| S1_3                |             | C1_4-C2_4-C3_4-C4_4 | -0.8(4)     |
| O3_3-S1_3-C10_3-    | 63.4(2)     | C2_4-C3_4-C4_4-C5_4 | 0.5(4)      |
| C9_3                |             | C3_4-C4_4-C5_4-C6_4 | 0.7(4)      |
| O5_3-S1_3-C10_3-    | -174.93(19) | C4_4-C5_4-C6_4-O1_4 | 178.7(3)    |
| C9_3                |             | C4_4-C5_4-C6_4-C1_4 | -1.6(4)     |
| O6_3-S1_3-C10_3-    | -56.9(2)    | C7_4-O1_4-C6_4-C5_4 | 179.7(3)    |
| C9_3                |             | C7_4-O1_4-C6_4-C1_4 | 0.0(3)      |
| O3_3-S1_3-C10_3-    | -117.4(2)   | C2_4-C1_4-C6_4-C5_4 | 1.3(4)      |
| C11_3               |             | N1_4-C1_4-C6_4-C5_4 | -179.8(3)   |
| O5_3-S1_3-C10_3-    | 4.3(2)      | C2_4-C1_4-C6_4-O1_4 | -178.9(2)   |
| C11_3               |             | N1_4-C1_4-C6_4-     | -0.1(3)     |
| O6_3-S1_3-C10_3-    | 122.3(2)    | O1_4                |             |
| C11_3               |             | C1_4-N1_4-C7_4-     | -0.2(3)     |
| C9_3-C10_3-C11_3-   | 3.3(4)      | O1_4                |             |
| C12_3               |             | C1_4-N1_4-C7_4-C8_4 | -179.3(2)   |
| S1_3-C10_3-C11_3-   | -175.89(19) | C6_4-O1_4-C7_4-     | 0.1(3)      |
| C12_3               |             | N1_4                |             |

|                     |             |                     |            |
|---------------------|-------------|---------------------|------------|
| C6_4-O1_4-C7_4-C8_4 | 179.3(2)    | C7_4-C8_4-C13_4-    | 1.2(4)     |
| N1_4-C7_4-C8_4-C9_4 | 174.4(2)    | O2_4                |            |
| O1_4-C7_4-C8_4-C9_4 | -4.6(4)     | C9_4-C8_4-C13_4-    | 1.3(4)     |
| N1_4-C7_4-C8_4-     | -5.2(4)     | C12_4               |            |
| C13_4               |             | C7_4-C8_4-C13_4-    | -179.0(2)  |
| O1_4-C7_4-C8_4-     | 175.7(2)    | C12_4               |            |
| C13_4               |             | O3_5-S1_5-O5_5-Ca3  | -19.5(6)   |
| C13_4-C8_4-C9_4-    | -0.5(4)     | O6_5-S1_5-O5_5-Ca3  | 109.6(6)   |
| C10_4               |             | C10_5-S1_5-O5_5-Ca3 | -136.4(5)  |
| C7_4-C8_4-C9_4-     | 179.9(2)    | Ca2-S1_5-O5_5-Ca3   | 118.7(6)   |
| C10_4               |             | O3_5-S1_5-O6_5-Ca2  | 146.16(12) |
| C8_4-C9_4-C10_4-    | -0.5(4)     | O5_5-S1_5-O6_5-Ca2  | 15.83(16)  |
| C11_4               |             | C10_5-S1_5-O6_5-Ca2 | -98.35(14) |
| C8_4-C9_4-C10_4-    | -179.77(19) | C7_5-N1_5-C1_5-C6_5 | 0.0(3)     |
| S1_4                |             | C7_5-N1_5-C1_5-C2_5 | 178.4(3)   |
| O3_4-S1_4-C10_4-    | 66.7(2)     | C6_5-C1_5-C2_5-C3_5 | -0.1(4)    |
| C9_4                |             | N1_5-C1_5-C2_5-C3_5 | -178.2(3)  |
| O5_4-S1_4-C10_4-    | -171.08(19) | C1_5-C2_5-C3_5-C4_5 | -0.9(4)    |
| C9_4                |             | C2_5-C3_5-C4_5-C5_5 | 0.7(4)     |
| O6_4-S1_4-C10_4-    | -53.0(2)    | C3_5-C4_5-C5_5-C6_5 | 0.5(4)     |
| C9_4                |             | C4_5-C5_5-C6_5-O1_5 | 178.4(3)   |
| Ca1-S1_4-C10_4-C9_4 | -84.3(2)    | C4_5-C5_5-C6_5-C1_5 | -1.5(4)    |
| O3_4-S1_4-C10_4-    | -112.6(2)   | C7_5-O1_5-C6_5-C5_5 | -179.9(3)  |
| C11_4               |             | C7_5-O1_5-C6_5-C1_5 | 0.0(3)     |
| O5_4-S1_4-C10_4-    | 9.7(2)      | C2_5-C1_5-C6_5-C5_5 | 1.4(4)     |
| C11_4               |             | N1_5-C1_5-C6_5-C5_5 | 179.9(2)   |
| O6_4-S1_4-C10_4-    | 127.8(2)    | C2_5-C1_5-C6_5-O1_5 | -178.5(2)  |
| C11_4               |             | N1_5-C1_5-C6_5-     | 0.0(3)     |
| Ca1-S1_4-C10_4-     | 96.5(2)     | O1_5                |            |
| C11_4               |             | C1_5-N1_5-C7_5-     | -0.1(3)    |
| C9_4-C10_4-C11_4-   | 0.6(4)      | O1_5                |            |
| C12_4               |             | C1_5-N1_5-C7_5-C8_5 | -179.9(2)  |
| S1_4-C10_4-C11_4-   | 179.83(19)  | C6_5-O1_5-C7_5-     | 0.1(3)     |
| C12_4               |             | N1_5                |            |
| C10_4-C11_4-C12_4-  | 0.3(4)      | C6_5-O1_5-C7_5-C8_5 | 179.9(2)   |
| C13_4               |             | N1_5-C7_5-C8_5-C9_5 | 174.3(3)   |
| C10_4-C11_4-C12_4-  | 179.69(19)  | O1_5-C7_5-C8_5-C9_5 | -5.6(4)    |
| C11_4               |             | N1_5-C7_5-C8_5-     | -4.6(4)    |
| C11_4-C12_4-C13_4-  | 178.5(2)    | C13_5               |            |
| O2_4                |             | O1_5-C7_5-C8_5-     | 175.5(2)   |
| C11_4-C12_4-C13_4-  | -0.9(3)     | C13_5               |            |
| O2_4                |             | C13_5-C8_5-C9_5-    | -1.1(4)    |
| C11_4-C12_4-C13_4-  | -1.3(4)     | C10_5               |            |
| C8_4                |             | C7_5-C8_5-C9_5-     | 180.0(2)   |
| C11_4-C12_4-C13_4-  | 179.32(19)  | C10_5               |            |
| C8_4                |             | C8_5-C9_5-C10_5-    | -0.2(4)    |
| C9_4-C8_4-C13_4-    | -178.4(2)   | C11_5               |            |
| O2_4                |             |                     |            |

|                                   |             |                     |             |
|-----------------------------------|-------------|---------------------|-------------|
| C8_5-C9_5-C10_5-S1_5              | -179.62(19) | O5_6-S1_6-O6_6-Ca3  | 155.2(3)    |
| O3_5-S1_5-C10_5-C9_5              | 70.2(2)     | C10_6-S1_6-O6_6-Ca3 | 40.8(3)     |
| O5_5-S1_5-C10_5-C9_5              | -167.4(2)   | C7_6-N1_6-C1_6-C6_6 | 0.0(3)      |
| O6_5-S1_5-C10_5-C9_5              | -49.2(2)    | C7_6-N1_6-C1_6-C2_6 | 178.5(3)    |
| Ca2-S1_5-C10_5-C9_5               | -85.4(2)    | C6_6-C1_6-C2_6-C3_6 | 0.1(4)      |
| O3_5-S1_5-C10_5-C11_5             | -109.2(2)   | N1_6-C1_6-C2_6-C3_6 | -178.3(3)   |
| O5_5-S1_5-C10_5-C11_5             | 13.2(2)     | C1_6-C2_6-C3_6-C4_6 | -0.4(4)     |
| O6_5-S1_5-C10_5-C11_5             | 131.4(2)    | C2_6-C3_6-C4_6-C5_6 | 0.3(4)      |
| Ca2-S1_5-C10_5-C11_5              | 95.2(2)     | C3_6-C4_6-C5_6-C6_6 | 0.2(4)      |
| C9_5-C10_5-C11_5-C12_5            | 0.9(4)      | C4_6-C5_6-C6_6-C1_6 | -0.6(4)     |
| S1_5-C10_5-C11_5-C12_5            | -179.7(2)   | C4_6-C5_6-C6_6-O1_6 | 178.5(3)    |
| C10_5-C11_5-C12_5-C13_5           | -0.2(4)     | C2_6-C1_6-C6_6-C5_6 | 0.5(4)      |
| C10_5-C11_5-C12_5-C11_5           | 178.89(19)  | N1_6-C1_6-C6_6-C5_6 | 179.2(3)    |
| C11_5-C12_5-C13_5-O2_5            | 179.2(2)    | C2_6-C1_6-C6_6-O1_6 | -178.8(2)   |
| C11_5-C12_5-C13_5-O2_5            | 0.1(3)      | N1_6-C1_6-C6_6-     | -0.1(3)     |
| C11_5-C12_5-C13_5-C8_5            | -1.1(4)     | O1_6                |             |
| C11_5-C12_5-C13_5-C8_5            | 179.83(19)  | C7_6-O1_6-C6_6-C5_6 | -179.1(3)   |
| C9_5-C8_5-C13_5-O2_5              | -178.6(2)   | C7_6-O1_6-C6_6-C1_6 | 0.1(3)      |
| C7_5-C8_5-C13_5-O2_5              | 0.3(4)      | C1_6-N1_6-C7_6-     | 0.0(3)      |
| C9_5-C8_5-C13_5-C12_5             | 1.7(4)      | O1_6                |             |
| C7_5-C8_5-C13_5-C12_5             | -179.3(2)   | C1_6-N1_6-C7_6-C8_6 | 179.7(2)    |
| O3_6-S1_6-O5_6-Ca1 <sup>#2</sup>  | -135.23(14) | C6_6-O1_6-C7_6-     | -0.1(3)     |
| O6_6-S1_6-O5_6-Ca1 <sup>#2</sup>  | -6.30(19)   | N1_6                |             |
| C10_6-S1_6-O5_6-Ca1 <sup>#2</sup> | 109.04(16)  | C6_6-O1_6-C7_6-C8_6 | -179.7(2)   |
| O3_6-S1_6-O6_6-Ca3                | -75.6(3)    | N1_6-C7_6-C8_6-C9_6 | 177.7(2)    |
|                                   |             | O1_6-C7_6-C8_6-C9_6 | -2.7(4)     |
|                                   |             | N1_6-C7_6-C8_6-     | -3.1(4)     |
|                                   |             | C13_6               |             |
|                                   |             | O1_6-C7_6-C8_6-     | 176.5(2)    |
|                                   |             | C13_6               |             |
|                                   |             | C13_6-C8_6-C9_6-    | -0.1(4)     |
|                                   |             | C10_6               |             |
|                                   |             | C7_6-C8_6-C9_6-     | 179.1(2)    |
|                                   |             | C10_6               |             |
|                                   |             | C8_6-C9_6-C10_6-    | 0.1(4)      |
|                                   |             | C11_6               |             |
|                                   |             | C8_6-C9_6-C10_6-    | -179.93(19) |
|                                   |             | S1_6                |             |
|                                   |             | O3_6-S1_6-C10_6-    | 32.4(2)     |
|                                   |             | C9_6                |             |
|                                   |             | O6_6-S1_6-C10_6-    | -88.6(2)    |
|                                   |             | C9_6                |             |
|                                   |             | O5_6-S1_6-C10_6-    | 153.3(2)    |
|                                   |             | C9_6                |             |
|                                   |             | O3_6-S1_6-C10_6-    | -147.6(2)   |
|                                   |             | C11_6               |             |
|                                   |             | O6_6-S1_6-C10_6-    | 91.4(2)     |
|                                   |             | C11_6               |             |



|                             |             |                             |             |
|-----------------------------|-------------|-----------------------------|-------------|
| O5_6-S1_6-C10_6-<br>C11_6   | -26.7(2)    | N1_7-C1_7-C6_7-<br>O1_7     | -0.1(3)     |
| C9_6-C10_6-C11_6-<br>C12_6  | -0.1(4)     | C7_7-O1_7-C6_7-C5_7         | -179.5(3)   |
| S1_6-C10_6-C11_6-<br>C12_6  | 179.95(19)  | C7_7-O1_7-C6_7-C1_7         | -0.2(3)     |
| C10_6-C11_6-C12_6-<br>C13_6 | 0.0(4)      | C1_7-N1_7-C7_7-<br>O1_7     | -0.4(3)     |
| C10_6-C11_6-C12_6-<br>C11_6 | -178.78(19) | C1_7-N1_7-C7_7-C8_7         | -179.9(2)   |
| C9_6-C8_6-C13_6-<br>O2_6    | 179.2(2)    | C6_7-O1_7-C7_7-<br>N1_7     | 0.4(3)      |
| C7_6-C8_6-C13_6-<br>O2_6    | 0.0(4)      | C6_7-O1_7-C7_7-C8_7         | 179.9(2)    |
| C9_6-C8_6-C13_6-<br>C12_6   | 0.0(4)      | N1_7-C7_7-C8_7-C9_7         | 178.1(3)    |
| C7_6-C8_6-C13_6-<br>C12_6   | -179.1(2)   | O1_7-C7_7-C8_7-C9_7         | -1.3(4)     |
| C11_6-C12_6-C13_6-<br>O2_6  | -179.2(2)   | N1_7-C7_7-C8_7-<br>C13_7    | -2.9(4)     |
| Cl1_6-C12_6-C13_6-<br>O2_6  | -0.4(3)     | O1_7-C7_7-C8_7-<br>C13_7    | 177.6(2)    |
| C11_6-C12_6-C13_6-<br>C8_6  | 0.0(4)      | C13_7-C8_7-C9_7-<br>C10_7   | 0.1(4)      |
| Cl1_6-C12_6-C13_6-<br>C8_6  | 178.84(19)  | C7_7-C8_7-C9_7-<br>C10_7    | 179.1(2)    |
| O3_7-S1_7-O5_7-Ca3          | -127.36(11) | C8_7-C9_7-C10_7-<br>C11_7   | 0.2(4)      |
| O6_7-S1_7-O5_7-Ca3          | 1.98(13)    | C8_7-C9_7-C10_7-<br>S1_7    | -179.25(19) |
| C10_7-S1_7-O5_7-Ca3         | 115.64(11)  | O3_7-S1_7-C10_7-<br>C9_7    | 14.2(2)     |
| O3_7-S1_7-O6_7-Ca2          | -43.7(2)    | O5_7-S1_7-C10_7-<br>C9_7    | 137.1(2)    |
| O5_7-S1_7-O6_7-Ca2          | -173.48(16) | O6_7-S1_7-C10_7-<br>C9_7    | -107.9(2)   |
| C10_7-S1_7-O6_7-Ca2         | 73.0(2)     | Ca3-S1_7-C10_7-C9_7         | -175.20(17) |
| Ca3-S1_7-O6_7-Ca2           | -171.9(2)   | O3_7-S1_7-C10_7-<br>C11_7   | -165.2(2)   |
| O3_7-S1_7-O6_7-Ca3          | 128.14(10)  | O5_7-S1_7-C10_7-<br>C11_7   | -42.4(2)    |
| O5_7-S1_7-O6_7-Ca3          | -1.60(10)   | O6_7-S1_7-C10_7-<br>C11_7   | 72.7(2)     |
| C10_7-S1_7-O6_7-Ca3         | -115.14(10) | Ca3-S1_7-C10_7-<br>C11_7    | 5.4(2)      |
| C7_7-N1_7-C1_7-C6_7         | 0.3(3)      | C9_7-C10_7-C11_7-<br>C12_7  | -0.1(4)     |
| C7_7-N1_7-C1_7-C2_7         | 178.9(3)    | S1_7-C10_7-C11_7-<br>C12_7  | 179.30(19)  |
| C6_7-C1_7-C2_7-C3_7         | 0.1(4)      | C10_7-C11_7-C12_7-<br>C13_7 | -0.2(4)     |
| N1_7-C1_7-C2_7-C3_7         | -178.4(3)   | C10_7-C11_7-C12_7-<br>Cl1_7 | -178.73(19) |
| C1_7-C2_7-C3_7-C4_7         | -0.6(4)     |                             |             |
| C2_7-C3_7-C4_7-C5_7         | 0.7(4)      |                             |             |
| C3_7-C4_7-C5_7-C6_7         | -0.2(4)     |                             |             |
| C4_7-C5_7-C6_7-C1_7         | -0.4(4)     |                             |             |
| C4_7-C5_7-C6_7-O1_7         | 178.8(3)    |                             |             |
| C2_7-C1_7-C6_7-C5_7         | 0.4(4)      |                             |             |
| N1_7-C1_7-C6_7-C5_7         | 179.2(3)    |                             |             |
| C2_7-C1_7-C6_7-O1_7         | -178.9(2)   |                             |             |

|                            |             |                             |             |
|----------------------------|-------------|-----------------------------|-------------|
| C11_7-C12_7-C13_7-<br>O2_7 | -178.7(2)   | O1_8-C7_8-C8_8-<br>C13_8    | 177.2(2)    |
| C11_7-C12_7-C13_7-<br>O2_7 | -0.1(3)     | C13_8-C8_8-C9_8-<br>C10_8   | -0.1(4)     |
| C11_7-C12_7-C13_7-<br>C8_7 | 0.4(4)      | C7_8-C8_8-C9_8-<br>C10_8    | 178.6(2)    |
| C11_7-C12_7-C13_7-<br>C8_7 | 178.96(19)  | C8_8-C9_8-C10_8-<br>C11_8   | 0.5(4)      |
| C9_7-C8_7-C13_7-<br>O2_7   | 178.7(2)    | C8_8-C9_8-C10_8-<br>S1_8    | -179.2(2)   |
| C7_7-C8_7-C13_7-<br>O2_7   | -0.3(4)     | O3_8-S1_8-C10_8-<br>C9_8    | 37.1(2)     |
| C9_7-C8_7-C13_7-<br>C12_7  | -0.3(4)     | O6_8-S1_8-C10_8-<br>C9_8    | -83.4(2)    |
| C7_7-C8_7-C13_7-<br>C12_7  | -179.3(2)   | O5_8-S1_8-C10_8-<br>C9_8    | 157.7(2)    |
| O3_8-S1_8-O5_8-Ca2         | -131.79(15) | O3_8-S1_8-C10_8-<br>C11_8   | -142.7(2)   |
| O6_8-S1_8-O5_8-Ca2         | -3.3(2)     | O6_8-S1_8-C10_8-<br>C11_8   | 96.8(2)     |
| C10_8-S1_8-O5_8-Ca2        | 112.39(16)  | O5_8-S1_8-C10_8-<br>C11_8   | -22.1(2)    |
| O3_8-S1_8-O6_8-Ca1         | -98.2(4)    | C9_8-C10_8-C11_8-<br>C12_8  | -0.7(4)     |
| O5_8-S1_8-O6_8-Ca1         | 133.1(4)    | S1_8-C10_8-C11_8-<br>C12_8  | 179.08(19)  |
| C10_8-S1_8-O6_8-Ca1        | 17.8(4)     | C10_8-C11_8-C12_8-<br>C13_8 | 0.4(4)      |
| C7_8-N1_8-C1_8-C6_8        | -0.2(3)     | C10_8-C11_8-C12_8-<br>C1_8  | -178.50(19) |
| C7_8-N1_8-C1_8-C2_8        | 178.9(3)    | C11_8-C12_8-C13_8-<br>O2_8  | -178.6(2)   |
| C6_8-C1_8-C2_8-C3_8        | 0.4(4)      | C1_8-C12_8-C13_8-<br>O2_8   | 0.3(3)      |
| N1_8-C1_8-C2_8-C3_8        | -178.5(3)   | C11_8-C12_8-C13_8-<br>C8_8  | 0.1(4)      |
| C1_8-C2_8-C3_8-C4_8        | -0.7(4)     | C1_8-C12_8-C13_8-<br>C8_8   | 178.98(19)  |
| C2_8-C3_8-C4_8-C5_8        | 0.6(4)      | C9_8-C8_8-C13_8-<br>O2_8    | 178.4(2)    |
| C3_8-C4_8-C5_8-C6_8        | -0.2(4)     | C7_8-C8_8-C13_8-<br>O2_8    | -0.2(4)     |
| C4_8-C5_8-C6_8-O1_8        | 178.9(3)    | C9_8-C8_8-C13_8-<br>C12_8   | -0.3(4)     |
| C4_8-C5_8-C6_8-C1_8        | -0.1(4)     | C7_8-C8_8-C13_8-<br>C12_8   | -178.9(2)   |
| C7_8-O1_8-C6_8-C5_8        | -178.9(3)   | Ca1-O1_9-S1_9-C2_9          | -102.27(16) |
| C7_8-O1_8-C6_8-C1_8        | 0.2(3)      | Ca1-O1_9-S1_9-C1_9          | 154.98(15)  |
| C2_8-C1_8-C6_8-C5_8        | 0.0(4)      |                             |             |
| N1_8-C1_8-C6_8-C5_8        | 179.1(3)    |                             |             |
| C2_8-C1_8-C6_8-O1_8        | -179.2(2)   |                             |             |
| N1_8-C1_8-C6_8-            | 0.0(3)      |                             |             |
| O1_8                       |             |                             |             |
| C1_8-N1_8-C7_8-            | 0.3(3)      |                             |             |
| O1_8                       |             |                             |             |
| C1_8-N1_8-C7_8-C8_8        | 179.4(2)    |                             |             |
| C6_8-O1_8-C7_8-            | -0.3(3)     |                             |             |
| N1_8                       |             |                             |             |
| C6_8-O1_8-C7_8-C8_8        | -179.5(2)   |                             |             |
| N1_8-C7_8-C8_8-C9_8        | 179.5(3)    |                             |             |
| O1_8-C7_8-C8_8-C9_8        | -1.5(4)     |                             |             |
| N1_8-C7_8-C8_8-            | -1.9(4)     |                             |             |
| C13_8                      |             |                             |             |

|                           |             |
|---------------------------|-------------|
| Ca2-O1_10-S1_10-<br>C2_10 | -103.74(16) |
| Ca2-O1_10-S1_10-<br>C1_10 | 153.28(15)  |
| Ca3-O1_11-S1_11-<br>C2_11 | -99.63(17)  |
| Ca3-O1_11-S1_11-<br>C1_11 | 157.70(15)  |
| Ca1-O1_12-S1_12-<br>C2_12 | -72.32(17)  |
| Ca1-O1_12-S1_12-<br>C1_12 | -176.42(15) |
| Ca3-O1_13-S1_13-<br>C1_13 | 91.24(19)   |
| Ca3-O1_13-S1_13-<br>C2_13 | -166.19(17) |
| Ca3-O1_14-S1_14-<br>C1_14 | -166.6(18)  |
| Ca3-O1_14-S1_14-<br>C2_14 | -64(2)      |

Symmetry transformations used to generate equivalent atoms:

#1: -1+X, +Y, +Z; #2: 1+X, +Y, +Z;

## Crystallographic data of 5:

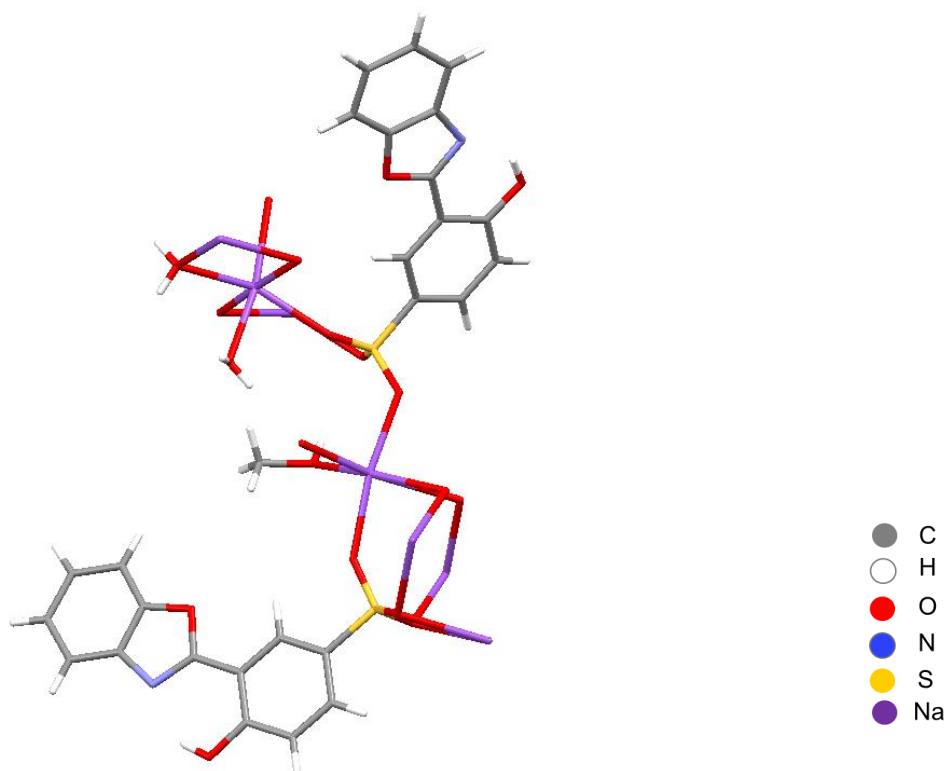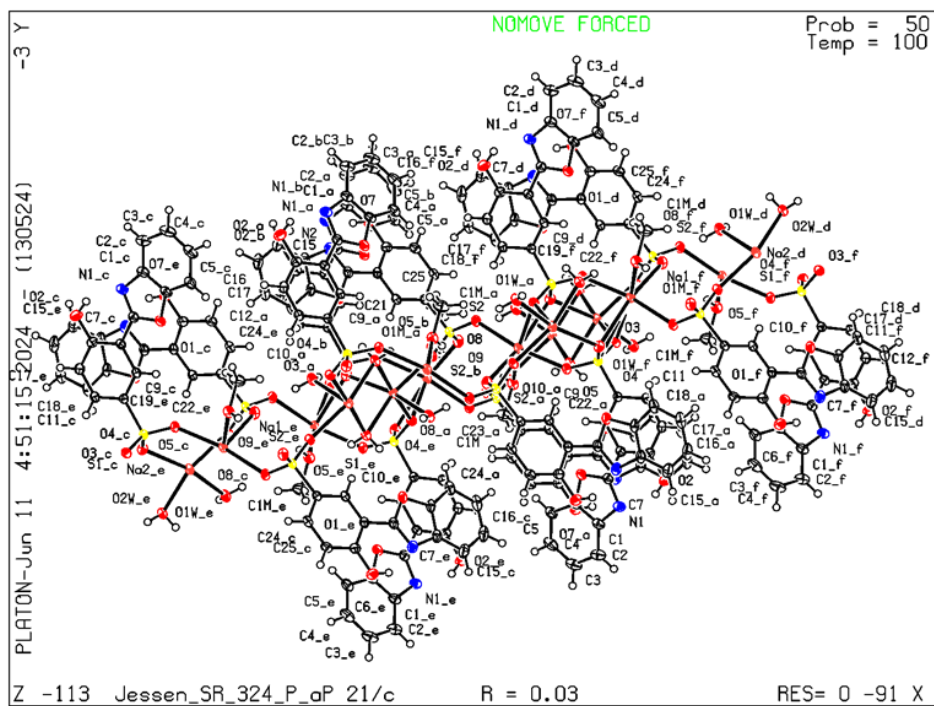

Figure S10: Crystal Structure of 5.

Crystals were obtained at room temperature from methanol by slow solvent evaporation. A yellow, plate-shaped crystal of **5** was mounted on a MiTeGen micromount with perfluoroether oil. Data were collected from a shock-cooled single crystal at 100(2) K on a Bruker D8 VENTURE dual wavelength Mo/Cu three-circle diffractometer with a microfocus sealed X-ray tube using a mirror optics as monochromator and a Bruker PHOTON III detector. The diffractometer was equipped with an Oxford Cryostream 800 low temperature device and used MoK $\alpha$  radiation ( $\lambda = 0.71073 \text{ \AA}$ ). All data were integrated with SAINT and a multi-scan absorption correction using SADABS was applied.<sup>[2,3]</sup> The structure was solved by direct methods using SHELXT and refined by full-matrix least-squares methods against  $F^2$  by SHELXL-2019/2.<sup>[4,5]</sup> All non-hydrogen atoms were refined with anisotropic displacement parameters. All C-bound hydrogen atoms were refined with isotropic displacement parameters. Some of their coordinates were refined freely and some on calculated positions using a riding model with their  $U_{\text{iso}}$  values constrained to 1.5 times the  $U_{\text{eq}}$  of their pivot atoms for terminal sp<sup>3</sup> carbon atoms and 1.2 times for all other carbon atoms. Crystallographic data for the structures reported here have been deposited with the Cambridge Crystallographic Data Centre.<sup>[8]</sup> CCDC 2361756 contain the supplementary crystallographic data for this paper. These data can be obtained free of charge from The Cambridge Crystallographic Data Centre via [www.ccdc.cam.ac.uk/structures](http://www.ccdc.cam.ac.uk/structures). This report and the CIF file were generated using FinalCif.<sup>[9]</sup>

**Table S7.** Crystal data and structure refinement for **5**.

|                                           |                                                                                               |
|-------------------------------------------|-----------------------------------------------------------------------------------------------|
| CCDC number                               | 2361756                                                                                       |
| Empirical formula                         | C <sub>27</sub> H <sub>24</sub> N <sub>2</sub> Na <sub>2</sub> O <sub>13</sub> S <sub>2</sub> |
| Formula weight                            | 694.58                                                                                        |
| Temperature [K]                           | 100(2)                                                                                        |
| Crystal system                            | monoclinic                                                                                    |
| Space group (number)                      | $P2_1/c$ (14)                                                                                 |
| $a$ [Å]                                   | 19.360(6)                                                                                     |
| $b$ [Å]                                   | 8.134(2)                                                                                      |
| $c$ [Å]                                   | 18.684(5)                                                                                     |
| $\alpha$ [°]                              | 90                                                                                            |
| $\beta$ [°]                               | 92.357(6)                                                                                     |
| $\gamma$ [°]                              | 90                                                                                            |
| Volume [Å <sup>3</sup> ]                  | 2940.0(14)                                                                                    |
| $Z$                                       | 4                                                                                             |
| $\rho_{\text{calc}}$ [gcm <sup>-3</sup> ] | 1.569                                                                                         |
| $\mu$ [mm <sup>-1</sup> ]                 | 0.283                                                                                         |
| $F(000)$                                  | 1432                                                                                          |
| Crystal size [mm <sup>3</sup> ]           | 0.488×0.209×0.020                                                                             |
| Crystal colour                            | yellow                                                                                        |

|                                                                   |                                                                            |
|-------------------------------------------------------------------|----------------------------------------------------------------------------|
| Crystal shape                                                     | plate                                                                      |
| Radiation                                                         | MoK $\alpha$ ( $\lambda=0.71073$ Å)                                        |
| 2 $\theta$ range [°]                                              | 4.21 to 56.73 (0.75 Å)                                                     |
| Index ranges                                                      | -25 $\leq$ h $\leq$ 25<br>-10 $\leq$ k $\leq$ 10<br>-24 $\leq$ l $\leq$ 24 |
| Reflections collected                                             | 196988                                                                     |
| Independent reflections                                           | 7341<br>$R_{\text{int}} = 0.0616$<br>$R_{\text{sigma}} = 0.0168$           |
| Completeness to<br>$\theta = 25.242^\circ$                        | 100.0 %                                                                    |
| Data / Restraints / Parameters                                    | 7341/6/436                                                                 |
| Absorption correction<br>$T_{\text{min}}/T_{\text{max}}$ (method) | 0.6845/0.7457<br>(multi-scan)                                              |
| Goodness-of-fit on $F^2$                                          | 1.041                                                                      |
| Final $R$ indexes<br>[ $I \geq 2\sigma(I)$ ]                      | $R_1 = 0.0340$<br>$wR_2 = 0.0819$                                          |
| Final $R$ indexes<br>[all data]                                   | $R_1 = 0.0430$<br>$wR_2 = 0.0873$                                          |
| Largest peak/hole [eÅ $^{-3}$ ]                                   | 0.59/-0.44                                                                 |

**Table S8. Atomic coordinates and  $U_{\text{eq}}$  [Å $^2$ ] for 5.**

| Atom | x           | y           | z           | $U_{\text{eq}}$ |
|------|-------------|-------------|-------------|-----------------|
| S1   | 0.40148(2)  | 0.52705(5)  | 1.01549(2)  | 0.01459(8)      |
| S2   | 0.58184(2)  | 0.22841(5)  | 0.72796(2)  | 0.01473(8)      |
| Na1  | 0.49158(3)  | 0.41691(8)  | 0.85860(3)  | 0.01728(13)     |
| Na2  | 0.49633(3)  | 0.32409(7)  | 0.55355(3)  | 0.01647(13)     |
| O1   | 0.18180(6)  | 0.27968(14) | 0.88152(6)  | 0.0204(2)       |
| O2   | 0.10038(6)  | 0.54725(17) | 1.05296(7)  | 0.0269(3)       |
| H2A  | 0.0796(7)   | 0.503(3)    | 1.0200(12)  | 0.040           |
| O3   | 0.42896(6)  | 0.41254(14) | 1.06966(6)  | 0.0181(2)       |
| O4   | 0.42800(6)  | 0.69322(14) | 1.02931(6)  | 0.0193(2)       |
| O5   | 0.41053(6)  | 0.47216(15) | 0.94254(6)  | 0.0208(2)       |
| O6   | 0.73338(6)  | 0.46431(14) | 0.52105(6)  | 0.0206(2)       |
| O7   | 0.87547(6)  | 0.20123(17) | 0.65570(7)  | 0.0264(3)       |
| H7A  | 0.8836(3)   | 0.262(3)    | 0.6193(13)  | 0.040           |
| O8   | 0.58287(6)  | 0.32525(14) | 0.79344(6)  | 0.0198(2)       |
| O9   | 0.55909(6)  | 0.05973(14) | 0.74009(6)  | 0.0214(2)       |
| O10  | 0.54398(6)  | 0.30744(16) | 0.66886(6)  | 0.0238(3)       |
| N1   | 0.08419(7)  | 0.36269(18) | 0.93328(8)  | 0.0218(3)       |
| N2   | 0.84542(7)  | 0.39889(18) | 0.54439(8)  | 0.0234(3)       |
| C1   | 0.06612(9)  | 0.2609(2)   | 0.87454(9)  | 0.0227(3)       |
| C2   | 0.00225(10) | 0.2079(2)   | 0.84670(10) | 0.0290(4)       |
| H2   | -0.039723   | 0.239745    | 0.867366    | 0.035           |
| C3   | 0.00297(10) | 0.1056(2)   | 0.78699(11) | 0.0338(4)       |

|      |             |             |             |           |
|------|-------------|-------------|-------------|-----------|
| H3   | -0.039734   | 0.068422    | 0.765981    | 0.041     |
| C4   | 0.06426(11) | 0.0562(2)   | 0.75711(10) | 0.0315(4) |
| H4   | 0.062264    | -0.014408   | 0.716565    | 0.038     |
| C5   | 0.12844(10) | 0.1075(2)   | 0.78513(9)  | 0.0262(4) |
| H5   | 0.170631    | 0.073596    | 0.765489    | 0.031     |
| C6   | 0.12634(9)  | 0.2109(2)   | 0.84338(9)  | 0.0221(3) |
| C7   | 0.15130(8)  | 0.3688(2)   | 0.93410(8)  | 0.0192(3) |
| C8   | 0.19639(8)  | 0.45680(19) | 0.98440(8)  | 0.0177(3) |
| C9   | 0.26805(8)  | 0.45651(19) | 0.97645(8)  | 0.0167(3) |
| H9   | 0.286860    | 0.401757    | 0.936779    | 0.020     |
| C10  | 0.31142(8)  | 0.53504(18) | 1.02572(8)  | 0.0154(3) |
| C11  | 0.28405(8)  | 0.6150(2)   | 1.08477(8)  | 0.0192(3) |
| H11  | 0.314063    | 0.666861    | 1.119363    | 0.023     |
| C12  | 0.21340(8)  | 0.6182(2)   | 1.09255(9)  | 0.0215(3) |
| H12  | 0.194960    | 0.673931    | 1.132162    | 0.026     |
| C13  | 0.16885(8)  | 0.5400(2)   | 1.04255(9)  | 0.0200(3) |
| C14  | 0.84039(9)  | 0.4964(2)   | 0.48216(9)  | 0.0237(3) |
| C15  | 0.89092(10) | 0.5547(2)   | 0.43748(10) | 0.0305(4) |
| H15  | 0.938515    | 0.530484    | 0.446249    | 0.037     |
| C16  | 0.86817(11) | 0.6497(2)   | 0.37970(10) | 0.0334(4) |
| H16  | 0.901092    | 0.691644    | 0.348099    | 0.040     |
| C17  | 0.79845(11) | 0.6855(2)   | 0.36651(9)  | 0.0311(4) |
| H17  | 0.785349    | 0.750693    | 0.326016    | 0.037     |
| C18  | 0.74728(10) | 0.6290(2)   | 0.41063(9)  | 0.0260(4) |
| H18  | 0.699633    | 0.652938    | 0.402033    | 0.031     |
| C19  | 0.77171(9)  | 0.5349(2)   | 0.46819(8)  | 0.0223(3) |
| C20  | 0.78206(8)  | 0.3852(2)   | 0.56391(8)  | 0.0200(3) |
| C21  | 0.75948(8)  | 0.2975(2)   | 0.62628(8)  | 0.0184(3) |
| C22  | 0.68975(8)  | 0.29844(19) | 0.64361(8)  | 0.0172(3) |
| H22  | 0.656729    | 0.355438    | 0.613912    | 0.021     |
| C23  | 0.66896(8)  | 0.21663(19) | 0.70382(8)  | 0.0162(3) |
| C24  | 0.71698(8)  | 0.1298(2)   | 0.74699(8)  | 0.0193(3) |
| H24  | 0.702353    | 0.073258    | 0.788192    | 0.023     |
| C25  | 0.78568(9)  | 0.1261(2)   | 0.72988(9)  | 0.0220(3) |
| H25  | 0.818075    | 0.066301    | 0.759231    | 0.026     |
| C26  | 0.80792(8)  | 0.2100(2)   | 0.66954(9)  | 0.0203(3) |
| C1M  | 0.36629(10) | 0.2006(2)   | 0.77082(11) | 0.0329(4) |
| H1MA | 0.380775    | 0.222274    | 0.722067    | 0.049     |
| H1MB | 0.340032    | 0.294877    | 0.787842    | 0.049     |
| H1MC | 0.337150    | 0.102132    | 0.770809    | 0.049     |
| O1M  | 0.42609(6)  | 0.17529(15) | 0.81722(6)  | 0.0223(2) |
| H1   | 0.4478(12)  | 0.099(3)    | 0.8036(12)  | 0.033     |
| O1W  | 0.41637(6)  | 0.50423(15) | 0.60806(6)  | 0.0216(2) |
| H1W1 | 0.4225(11)  | 0.510(3)    | 0.6517(9)   | 0.032     |
| H2W1 | 0.4147(11)  | 0.599(2)    | 0.5926(11)  | 0.032     |
| O2W  | 0.42706(6)  | 0.44028(14) | 0.45766(6)  | 0.0194(2) |
| H1W2 | 0.3881(9)   | 0.448(3)    | 0.4736(11)  | 0.029     |
| H2W2 | 0.4196(11)  | 0.394(3)    | 0.4184(10)  | 0.029     |

$U_{eq}$  is defined as 1/3 of the trace of the orthogonalized  $U_j$  tensor.

**Table S9.** Anisotropic displacement parameters [ $\text{\AA}^2$ ] for **5**.

The anisotropic displacement factor exponent takes the form:

$$-2\pi^2 [ h^2(a^*)^2 U_{11} + k^2(b^*)^2 U_{22} + \dots + 2hka^*b^* U_{12} ]$$

| Atom | $U_{11}$    | $U_{22}$    | $U_{33}$    | $U_{23}$     | $U_{13}$     | $U_{12}$     |
|------|-------------|-------------|-------------|--------------|--------------|--------------|
| S1   | 0.01713(17) | 0.01375(17) | 0.01292(16) | -0.00046(13) | 0.00108(12)  | -0.00063(13) |
| S2   | 0.01926(17) | 0.01467(17) | 0.01020(15) | 0.00020(13)  | -0.00002(12) | -0.00046(13) |
| Na1  | 0.0203(3)   | 0.0192(3)   | 0.0123(3)   | -0.0016(2)   | 0.0008(2)    | 0.0004(2)    |
| Na2  | 0.0228(3)   | 0.0135(3)   | 0.0130(3)   | 0.0003(2)    | -0.0002(2)   | 0.0005(2)    |
| O1   | 0.0228(6)   | 0.0218(6)   | 0.0165(5)   | -0.0002(4)   | -0.0019(4)   | -0.0042(5)   |
| O2   | 0.0189(6)   | 0.0306(7)   | 0.0315(7)   | -0.0045(5)   | 0.0025(5)    | 0.0004(5)    |
| O3   | 0.0207(5)   | 0.0164(5)   | 0.0170(5)   | 0.0017(4)    | -0.0009(4)   | 0.0017(4)    |
| O4   | 0.0223(5)   | 0.0143(5)   | 0.0216(5)   | -0.0003(4)   | 0.0038(4)    | -0.0028(4)   |
| O5   | 0.0215(5)   | 0.0266(6)   | 0.0145(5)   | -0.0042(4)   | 0.0032(4)    | -0.0003(5)   |
| O6   | 0.0251(6)   | 0.0217(6)   | 0.0153(5)   | 0.0011(4)    | 0.0038(4)    | -0.0035(5)   |
| O7   | 0.0201(6)   | 0.0321(7)   | 0.0271(6)   | -0.0031(5)   | 0.0018(5)    | 0.0027(5)    |
| O8   | 0.0227(5)   | 0.0208(6)   | 0.0159(5)   | -0.0055(4)   | 0.0022(4)    | -0.0007(4)   |
| O9   | 0.0280(6)   | 0.0164(6)   | 0.0200(5)   | -0.0006(4)   | 0.0042(4)    | -0.0044(5)   |
| O10  | 0.0223(6)   | 0.0345(7)   | 0.0144(5)   | 0.0079(5)    | -0.0006(4)   | 0.0038(5)    |
| N1   | 0.0213(7)   | 0.0198(7)   | 0.0239(7)   | 0.0043(6)    | -0.0039(5)   | -0.0016(5)   |
| N2   | 0.0258(7)   | 0.0235(7)   | 0.0212(7)   | -0.0056(6)   | 0.0059(5)    | -0.0041(6)   |
| C1   | 0.0254(8)   | 0.0185(8)   | 0.0237(8)   | 0.0062(6)    | -0.0060(6)   | -0.0029(6)   |
| C2   | 0.0256(9)   | 0.0239(9)   | 0.0368(10)  | 0.0063(7)    | -0.0088(7)   | -0.0034(7)   |
| C3   | 0.0334(10)  | 0.0285(10)  | 0.0380(10)  | 0.0048(8)    | -0.0162(8)   | -0.0073(8)   |
| C4   | 0.0426(11)  | 0.0250(9)   | 0.0258(9)   | 0.0007(7)    | -0.0115(8)   | -0.0074(8)   |
| C5   | 0.0336(9)   | 0.0245(9)   | 0.0201(8)   | 0.0042(7)    | -0.0035(7)   | -0.0054(7)   |
| C6   | 0.0254(8)   | 0.0204(8)   | 0.0200(7)   | 0.0060(6)    | -0.0062(6)   | -0.0064(6)   |
| C7   | 0.0222(7)   | 0.0170(7)   | 0.0182(7)   | 0.0039(6)    | -0.0007(6)   | -0.0005(6)   |
| C8   | 0.0203(7)   | 0.0164(7)   | 0.0162(7)   | 0.0029(6)    | -0.0013(5)   | -0.0003(6)   |
| C9   | 0.0206(7)   | 0.0154(7)   | 0.0140(7)   | 0.0016(5)    | 0.0002(5)    | 0.0004(6)    |
| C10  | 0.0178(7)   | 0.0134(7)   | 0.0149(7)   | 0.0025(5)    | 0.0008(5)    | 0.0005(5)    |
| C11  | 0.0228(8)   | 0.0178(7)   | 0.0169(7)   | -0.0019(6)   | 0.0004(6)    | -0.0008(6)   |
| C12  | 0.0238(8)   | 0.0203(8)   | 0.0205(7)   | -0.0031(6)   | 0.0031(6)    | 0.0016(6)    |
| C13  | 0.0188(7)   | 0.0181(7)   | 0.0232(8)   | 0.0013(6)    | 0.0019(6)    | 0.0014(6)    |
| C14  | 0.0306(9)   | 0.0217(8)   | 0.0193(8)   | -0.0063(6)   | 0.0062(6)    | -0.0074(7)   |
| C15  | 0.0325(9)   | 0.0334(10)  | 0.0264(9)   | -0.0085(8)   | 0.0105(7)    | -0.0099(8)   |
| C16  | 0.0458(11)  | 0.0319(10)  | 0.0235(9)   | -0.0056(7)   | 0.0148(8)    | -0.0170(9)   |
| C17  | 0.0502(12)  | 0.0255(9)   | 0.0182(8)   | -0.0026(7)   | 0.0072(7)    | -0.0125(8)   |
| C18  | 0.0387(10)  | 0.0228(8)   | 0.0168(7)   | -0.0023(6)   | 0.0031(7)    | -0.0074(7)   |
| C19  | 0.0314(9)   | 0.0191(8)   | 0.0168(7)   | -0.0041(6)   | 0.0077(6)    | -0.0086(7)   |
| C20  | 0.0245(8)   | 0.0189(8)   | 0.0165(7)   | -0.0049(6)   | 0.0017(6)    | -0.0030(6)   |
| C21  | 0.0222(7)   | 0.0170(7)   | 0.0160(7)   | -0.0033(6)   | 0.0021(6)    | -0.0011(6)   |
| C22  | 0.0216(7)   | 0.0147(7)   | 0.0150(7)   | -0.0012(5)   | -0.0003(5)   | 0.0000(6)    |
| C23  | 0.0200(7)   | 0.0146(7)   | 0.0139(7)   | -0.0022(5)   | -0.0002(5)   | 0.0002(6)    |
| C24  | 0.0260(8)   | 0.0171(7)   | 0.0146(7)   | 0.0005(6)    | -0.0016(6)   | 0.0015(6)    |
| C25  | 0.0240(8)   | 0.0205(8)   | 0.0210(8)   | -0.0021(6)   | -0.0044(6)   | 0.0043(6)    |



|     |            |           |            |            |            |            |
|-----|------------|-----------|------------|------------|------------|------------|
| C26 | 0.0198(7)  | 0.0199(8) | 0.0213(7)  | -0.0057(6) | -0.0003(6) | 0.0015(6)  |
| C1M | 0.0332(10) | 0.0251(9) | 0.0394(10) | 0.0072(8)  | -0.0104(8) | -0.0013(7) |
| O1M | 0.0270(6)  | 0.0190(6) | 0.0207(6)  | 0.0001(5)  | 0.0000(5)  | 0.0042(5)  |
| O1W | 0.0302(6)  | 0.0182(6) | 0.0164(5)  | -0.0014(5) | -0.0001(5) | 0.0020(5)  |
| O2W | 0.0240(6)  | 0.0194(6) | 0.0147(5)  | -0.0013(4) | -0.0007(4) | 0.0000(5)  |

**Table S10.** Bond lengths and angles for **5**.

| <b>Atom-Atom</b>      | <b>Length [Å]</b> |          |          |
|-----------------------|-------------------|----------|----------|
| S1-O5                 | 1.4517(12)        | C2-C3    | 1.392(3) |
| S1-O3                 | 1.4597(11)        | C2-H2    | 0.9500   |
| S1-O4                 | 1.4651(12)        | C3-C4    | 1.391(3) |
| S1-C10                | 1.7631(16)        | C3-H3    | 0.9500   |
| S1-Na1 <sup>#1</sup>  | 3.1029(10)        | C4-C5    | 1.392(3) |
| S2-O10                | 1.4503(12)        | C4-H4    | 0.9500   |
| S2-O8                 | 1.4545(12)        | C5-C6    | 1.377(2) |
| S2-O9                 | 1.4615(12)        | C5-H5    | 0.9500   |
| S2-C23                | 1.7665(17)        | C7-C8    | 1.446(2) |
| S2-Na1 <sup>#2</sup>  | 3.2966(9)         | C8-C9    | 1.401(2) |
| Na1-O5                | 2.3079(13)        | C8-C13   | 1.404(2) |
| Na1-O8                | 2.3107(13)        | C9-C10   | 1.377(2) |
| Na1-O9 <sup>#3</sup>  | 2.3586(14)        | C9-H9    | 0.9500   |
| Na1-O3 <sup>#1</sup>  | 2.4327(13)        | C10-C11  | 1.403(2) |
| Na1-O1M               | 2.4469(15)        | C11-C12  | 1.382(2) |
| Na1-O4 <sup>#1</sup>  | 2.7101(14)        | C11-H11  | 0.9500   |
| Na1-Na2 <sup>#3</sup> | 3.6997(11)        | C12-C13  | 1.398(2) |
| Na1-Na2 <sup>#4</sup> | 4.1343(13)        | C12-H12  | 0.9500   |
| Na2-O10               | 2.3124(14)        | C14-C19  | 1.380(3) |
| Na2-O3 <sup>#5</sup>  | 2.3514(13)        | C14-C15  | 1.395(2) |
| Na2-O2W               | 2.3884(13)        | C15-C16  | 1.385(3) |
| Na2-O1W               | 2.3897(14)        | C15-H15  | 0.9500   |
| Na2-O4 <sup>#2</sup>  | 2.4214(13)        | C16-C17  | 1.393(3) |
| Na2-O2W <sup>#6</sup> | 2.4377(14)        | C16-H16  | 0.9500   |
| Na2-Na2 <sup>#6</sup> | 3.4983(14)        | C17-C18  | 1.392(3) |
| O1-C7                 | 1.374(2)          | C17-H17  | 0.9500   |
| O1-C6                 | 1.3825(19)        | C18-C19  | 1.387(2) |
| O2-C13                | 1.349(2)          | C18-H18  | 0.9500   |
| O2-H2A                | 0.81(3)           | C20-C21  | 1.449(2) |
| O6-C20                | 1.371(2)          | C21-C22  | 1.401(2) |
| O6-C19                | 1.3842(19)        | C21-C26  | 1.406(2) |
| O7-C26                | 1.345(2)          | C22-C23  | 1.381(2) |
| O7-H7A                | 0.86(3)           | C22-H22  | 0.9500   |
| N1-C7                 | 1.300(2)          | C23-C24  | 1.397(2) |
| N1-C1                 | 1.407(2)          | C24-C25  | 1.381(2) |
| N2-C20                | 1.299(2)          | C24-H24  | 0.9500   |
| N2-C14                | 1.407(2)          | C25-C26  | 1.401(2) |
| C1-C6                 | 1.385(3)          | C25-H25  | 0.9500   |
| C1-C2                 | 1.390(2)          | C1M-O1M  | 1.433(2) |
|                       |                   | C1M-H1MA | 0.9800   |

|                                        |                  |                                          |            |
|----------------------------------------|------------------|------------------------------------------|------------|
| C1M–H1MB                               | 0.9800           | O1M–Na1–S1 <sup>#1</sup>                 | 132.72(4)  |
| C1M–H1MC                               | 0.9800           | O4 <sup>#1</sup> –Na1–S1 <sup>#1</sup>   | 28.17(3)   |
| O1M–H1                                 | 0.80(2)          | O5–Na1–S2 <sup>#3</sup>                  | 83.82(4)   |
| O1W–H1W1                               | 0.821(17)        | O8–Na1–S2 <sup>#3</sup>                  | 108.25(4)  |
| O1W–H2W1                               | 0.826(18)        | O9 <sup>#3</sup> –Na1–S2 <sup>#3</sup>   | 23.19(3)   |
| O2W–H1W2                               | 0.824(17)        | O3 <sup>#1</sup> –Na1–S2 <sup>#3</sup>   | 94.71(4)   |
| O2W–H2W2                               | 0.832(17)        | O1M–Na1–S2 <sup>#3</sup>                 | 104.78(4)  |
|                                        |                  | O4 <sup>#1</sup> –Na1–S2 <sup>#3</sup>   | 148.83(3)  |
| <b>Atom–Atom–Atom</b>                  | <b>Angle [°]</b> | S1 <sup>#1</sup> –Na1–S2 <sup>#3</sup>   | 121.32(2)  |
| O5–S1–O3                               | 113.58(7)        | O5–Na1–Na2 <sup>#3</sup>                 | 63.68(4)   |
| O5–S1–O4                               | 113.22(7)        | O8–Na1–Na2 <sup>#3</sup>                 | 119.13(4)  |
| O3–S1–O4                               | 110.57(7)        | O9 <sup>#3</sup> –Na1–Na2 <sup>#3</sup>  | 85.56(4)   |
| O5–S1–C10                              | 105.74(7)        | O3 <sup>#1</sup> –Na1–Na2 <sup>#3</sup>  | 38.56(3)   |
| O3–S1–C10                              | 106.40(7)        | O1M–Na1–Na2 <sup>#3</sup>                | 151.86(4)  |
| O4–S1–C10                              | 106.73(7)        | O4 <sup>#1</sup> –Na1–Na2 <sup>#3</sup>  | 85.94(3)   |
| O5–S1–Na1 <sup>#1</sup>                | 130.88(5)        | S1 <sup>#1</sup> –Na1–Na2 <sup>#3</sup>  | 60.268(17) |
| O3–S1–Na1 <sup>#1</sup>                | 49.85(5)         | S2 <sup>#3</sup> –Na1–Na2 <sup>#3</sup>  | 63.11(2)   |
| O4–S1–Na1 <sup>#1</sup>                | 60.84(5)         | O5–Na1–Na2 <sup>#4</sup>                 | 58.98(4)   |
| C10–S1–Na1 <sup>#1</sup>               | 122.99(5)        | O8–Na1–Na2 <sup>#4</sup>                 | 108.75(4)  |
| O10–S2–O8                              | 112.92(7)        | O9 <sup>#3</sup> –Na1–Na2 <sup>#4</sup>  | 156.32(4)  |
| O10–S2–O9                              | 112.84(7)        | O3 <sup>#1</sup> –Na1–Na2 <sup>#4</sup>  | 78.13(3)   |
| O8–S2–O9                               | 111.83(7)        | O1M–Na1–Na2 <sup>#4</sup>                | 83.68(4)   |
| O10–S2–C23                             | 106.71(7)        | O4 <sup>#1</sup> –Na1–Na2 <sup>#4</sup>  | 34.02(3)   |
| O8–S2–C23                              | 105.30(7)        | S1 <sup>#1</sup> –Na1–Na2 <sup>#4</sup>  | 53.966(19) |
| O9–S2–C23                              | 106.59(7)        | S2 <sup>#3</sup> –Na1–Na2 <sup>#4</sup>  | 142.21(2)  |
| O10–S2–Na1 <sup>#2</sup>               | 76.87(6)         | Na2 <sup>#3</sup> –Na1–Na2 <sup>#4</sup> | 92.00(3)   |
| O8–S2–Na1 <sup>#2</sup>                | 145.06(5)        | O10–Na2–O3 <sup>#5</sup>                 | 92.00(5)   |
| O9–S2–Na1 <sup>#2</sup>                | 39.46(5)         | O10–Na2–O2W                              | 155.82(5)  |
| C23–S2–Na1 <sup>#2</sup>               | 103.29(5)        | O3 <sup>#5</sup> –Na2–O2W                | 97.04(5)   |
| O5–Na1–O8                              | 167.71(5)        | O10–Na2–O1W                              | 83.08(5)   |
| O5–Na1–O9 <sup>#3</sup>                | 99.37(5)         | O3 <sup>#5</sup> –Na2–O1W                | 94.30(5)   |
| O8–Na1–O9 <sup>#3</sup>                | 92.84(5)         | O2W–Na2–O1W                              | 73.94(5)   |
| O5–Na1–O3 <sup>#1</sup>                | 86.95(5)         | O10–Na2–O4 <sup>#2</sup>                 | 109.96(5)  |
| O8–Na1–O3 <sup>#1</sup>                | 89.67(5)         | O3 <sup>#5</sup> –Na2–O4 <sup>#2</sup>   | 94.32(5)   |
| O9 <sup>#3</sup> –Na1–O3 <sup>#1</sup> | 112.53(5)        | O2W–Na2–O4 <sup>#2</sup>                 | 91.73(5)   |
| O5–Na1–O1M                             | 90.76(5)         | O1W–Na2–O4 <sup>#2</sup>                 | 164.08(5)  |
| O8–Na1–O1M                             | 88.39(5)         | O10–Na2–O2W <sup>#6</sup>                | 84.57(5)   |
| O9 <sup>#3</sup> –Na1–O1M              | 87.43(5)         | O3 <sup>#5</sup> –Na2–O2W <sup>#6</sup>  | 175.74(5)  |
| O3 <sup>#1</sup> –Na1–O1M              | 160.02(5)        | O2W–Na2–O2W <sup>#6</sup>                | 87.09(5)   |
| O5–Na1–O4 <sup>#1</sup>                | 85.66(5)         | O1W–Na2–O2W <sup>#6</sup>                | 87.80(5)   |
| O8–Na1–O4 <sup>#1</sup>                | 82.70(5)         | O4 <sup>#2</sup> –Na2–O2W <sup>#6</sup>  | 84.52(5)   |
| O9 <sup>#3</sup> –Na1–O4 <sup>#1</sup> | 166.96(5)        | O10–Na2–Na2 <sup>#6</sup>                | 123.84(5)  |
| O3 <sup>#1</sup> –Na1–O4 <sup>#1</sup> | 55.43(4)         | O3 <sup>#5</sup> –Na2–Na2 <sup>#6</sup>  | 141.14(4)  |
| O1M–Na1–O4 <sup>#1</sup>               | 104.62(4)        | O2W–Na2–Na2 <sup>#6</sup>                | 44.10(3)   |
| O5–Na1–S1 <sup>#1</sup>                | 84.68(4)         | O1W–Na2–Na2 <sup>#6</sup>                | 77.55(4)   |
| O8–Na1–S1 <sup>#1</sup>                | 86.89(4)         | O4 <sup>#2</sup> –Na2–Na2 <sup>#6</sup>  | 87.36(4)   |
| O9 <sup>#3</sup> –Na1–S1 <sup>#1</sup> | 139.77(4)        | O2W <sup>#6</sup> –Na2–Na2 <sup>#6</sup> | 42.99(3)   |
| O3 <sup>#1</sup> –Na1–S1 <sup>#1</sup> | 27.30(3)         | O10–Na2–Na1 <sup>#2</sup>                | 61.23(4)   |

|                                          |            |             |            |
|------------------------------------------|------------|-------------|------------|
| O3 <sup>#5</sup> -Na2-Na1 <sup>#2</sup>  | 40.15(3)   | N1-C7-O1    | 115.50(14) |
| O2W-Na2-Na1 <sup>#2</sup>                | 135.27(4)  | N1-C7-C8    | 127.10(15) |
| O1W-Na2-Na1 <sup>#2</sup>                | 112.97(4)  | O1-C7-C8    | 117.40(14) |
| O4 <sup>#2</sup> -Na2-Na1 <sup>#2</sup>  | 82.02(4)   | C9-C8-C13   | 119.48(14) |
| O2W <sup>#6</sup> -Na2-Na1 <sup>#2</sup> | 135.59(4)  | C9-C8-C7    | 120.28(14) |
| Na2 <sup>#6</sup> -Na2-Na1 <sup>#2</sup> | 169.37(3)  | C13-C8-C7   | 120.23(14) |
| O10-Na2-Na1 <sup>#5</sup>                | 141.87(4)  | C10-C9-C8   | 120.48(14) |
| O3 <sup>#5</sup> -Na2-Na1 <sup>#5</sup>  | 74.47(3)   | C10-C9-H9   | 119.8      |
| O2W-Na2-Na1 <sup>#5</sup>                | 62.30(4)   | C8-C9-H9    | 119.8      |
| O1W-Na2-Na1 <sup>#5</sup>                | 132.44(4)  | C9-C10-C11  | 120.07(14) |
| O4 <sup>#2</sup> -Na2-Na1 <sup>#5</sup>  | 38.77(3)   | C9-C10-S1   | 119.26(12) |
| O2W <sup>#6</sup> -Na2-Na1 <sup>#5</sup> | 106.78(4)  | C11-C10-S1  | 120.62(12) |
| Na2 <sup>#6</sup> -Na2-Na1 <sup>#5</sup> | 83.33(3)   | C12-C11-C10 | 119.93(14) |
| Na1 <sup>#2</sup> -Na2-Na1 <sup>#5</sup> | 88.00(3)   | C12-C11-H11 | 120.0      |
| C7-O1-C6                                 | 103.57(13) | C10-C11-H11 | 120.0      |
| C13-O2-H2A                               | 109.5      | C11-C12-C13 | 120.49(15) |
| S1-O3-Na2 <sup>#4</sup>                  | 128.45(7)  | C11-C12-H12 | 119.8      |
| S1-O3-Na1 <sup>#1</sup>                  | 102.85(6)  | C13-C12-H12 | 119.8      |
| Na2 <sup>#4</sup> -O3-Na1 <sup>#1</sup>  | 101.29(5)  | O2-C13-C12  | 117.83(15) |
| S1-O4-Na2 <sup>#3</sup>                  | 120.66(7)  | O2-C13-C8   | 122.64(15) |
| S1-O4-Na1 <sup>#1</sup>                  | 90.99(6)   | C12-C13-C8  | 119.53(15) |
| Na2 <sup>#3</sup> -O4-Na1 <sup>#1</sup>  | 107.22(5)  | C19-C14-C15 | 120.22(17) |
| S1-O5-Na1                                | 144.06(7)  | C19-C14-N2  | 108.51(14) |
| C20-O6-C19                               | 103.62(13) | C15-C14-N2  | 131.27(18) |
| C26-O7-H7A                               | 109.5      | C16-C15-C14 | 116.61(18) |
| S2-O8-Na1                                | 129.31(7)  | C16-C15-H15 | 121.7      |
| S2-O9-Na1 <sup>#2</sup>                  | 117.35(7)  | C14-C15-H15 | 121.7      |
| S2-O10-Na2                               | 154.84(8)  | C15-C16-C17 | 121.97(17) |
| C7-N1-C1                                 | 104.35(14) | C15-C16-H16 | 119.0      |
| C20-N2-C14                               | 104.24(14) | C17-C16-H16 | 119.0      |
| C6-C1-C2                                 | 120.16(17) | C18-C17-C16 | 122.29(18) |
| C6-C1-N1                                 | 108.30(14) | C18-C17-H17 | 118.9      |
| C2-C1-N1                                 | 131.53(17) | C16-C17-H17 | 118.9      |
| C1-C2-C3                                 | 116.56(18) | C19-C18-C17 | 114.38(18) |
| C1-C2-H2                                 | 121.7      | C19-C18-H18 | 122.8      |
| C3-C2-H2                                 | 121.7      | C17-C18-H18 | 122.8      |
| C4-C3-C2                                 | 122.08(17) | C14-C19-O6  | 108.14(15) |
| C4-C3-H3                                 | 119.0      | C14-C19-C18 | 124.53(16) |
| C2-C3-H3                                 | 119.0      | O6-C19-C18  | 127.33(16) |
| C3-C4-C5                                 | 121.67(18) | N2-C20-O6   | 115.48(14) |
| C3-C4-H4                                 | 119.2      | N2-C20-C21  | 125.97(15) |
| C5-C4-H4                                 | 119.2      | O6-C20-C21  | 118.54(14) |
| C6-C5-C4                                 | 115.17(18) | C22-C21-C26 | 119.74(15) |
| C6-C5-H5                                 | 122.4      | C22-C21-C20 | 120.56(14) |
| C4-C5-H5                                 | 122.4      | C26-C21-C20 | 119.70(15) |
| C5-C6-O1                                 | 127.37(16) | C23-C22-C21 | 120.10(14) |
| C5-C6-C1                                 | 124.34(16) | C23-C22-H22 | 120.0      |
| O1-C6-C1                                 | 108.28(15) | C21-C22-H22 | 120.0      |

|               |            |                             |            |
|---------------|------------|-----------------------------|------------|
| C22–C23–C24   | 120.30(15) | H1MA–C1M–H1MC               | 109.5      |
| C22–C23–S2    | 119.68(12) | H1MB–C1M–H1MC               | 109.5      |
| C24–C23–S2    | 119.98(12) | C1M–O1M–Na1                 | 118.09(11) |
| C25–C24–C23   | 120.11(15) | C1M–O1M–H1                  | 110.0(17)  |
| C25–C24–H24   | 119.9      | Na1–O1M–H1                  | 116.9(17)  |
| C23–C24–H24   | 119.9      | Na2–O1W–H1W1                | 112.8(16)  |
| C24–C25–C26   | 120.44(15) | Na2–O1W–H2W1                | 116.3(16)  |
| C24–C25–H25   | 119.8      | H1W1–O1W–H2W1               | 107(2)     |
| C26–C25–H25   | 119.8      | Na2–O2W–Na2 <sup>#6</sup>   | 92.91(5)   |
| O7–C26–C25    | 117.54(15) | Na2–O2W–H1W2                | 104.7(15)  |
| O7–C26–C21    | 123.15(15) | Na2 <sup>#6</sup> –O2W–H1W2 | 122.6(16)  |
| C25–C26–C21   | 119.30(15) | Na2–O2W–H2W2                | 123.6(15)  |
| O1M–C1M–H1MA  | 109.5      | Na2 <sup>#6</sup> –O2W–H2W2 | 111.3(15)  |
| O1M–C1M–H1MB  | 109.5      | H1W2–O2W–H2W2               | 103.1(19)  |
| H1MA–C1M–H1MB | 109.5      |                             |            |
| O1M–C1M–H1MC  | 109.5      |                             |            |

Symmetry transformations used to generate equivalent atoms:  
#1: 1-X, 1-Y, 2-Z; #2: 1-X, -0.5+Y, 1.5-Z; #3: 1-X, 0.5+Y, 1.5-Z; #4:  
+X, 0.5-Y, 0.5+Z; #5: +X, 0.5-Y, -0.5+Z; #6: 1-X, 1-Y, 1-Z;

**Table S11.** Torsion angles for **5**

| Atom–Atom–Atom–<br>Atom                    | Torsion Angle<br>[°] |                               |             |
|--------------------------------------------|----------------------|-------------------------------|-------------|
| O5–S1–O3–Na2 <sup>#1</sup>                 | 8.51(11)             | Na1 <sup>#4</sup> –S2–O10–Na2 | –31.25(17)  |
| O4–S1–O3–Na2 <sup>#1</sup>                 | –120.04(8)           | C7–N1–C1–C6                   | 0.27(18)    |
| C10–S1–O3–Na2 <sup>#1</sup>                | 124.43(8)            | C7–N1–C1–C2                   | 179.65(18)  |
| Na1 <sup>#2</sup> –S1–O3–Na2 <sup>#1</sup> | –115.95(10)          | C6–C1–C2–C3                   | –0.5(3)     |
| O5–S1–O3–Na1 <sup>#2</sup>                 | 124.47(6)            | N1–C1–C2–C3                   | –179.86(17) |
| O4–S1–O3–Na1 <sup>#2</sup>                 | –4.09(8)             | C1–C2–C3–C4                   | 1.1(3)      |
| C10–S1–O3–Na1 <sup>#2</sup>                | –119.62(6)           | C2–C3–C4–C5                   | –0.5(3)     |
| O5–S1–O4–Na2 <sup>#3</sup>                 | –14.42(10)           | C3–C4–C5–C6                   | –0.7(3)     |
| O3–S1–O4–Na2 <sup>#3</sup>                 | 114.33(8)            | C4–C5–C6–O1                   | 179.91(16)  |
| C10–S1–O4–Na2 <sup>#3</sup>                | –130.35(7)           | C4–C5–C6–C1                   | 1.2(3)      |
| Na1 <sup>#2</sup> –S1–O4–Na2 <sup>#3</sup> | 110.75(8)            | C7–O1–C6–C5                   | –178.98(16) |
| O5–S1–O4–Na1 <sup>#2</sup>                 | –125.18(6)           | C7–O1–C6–C1                   | –0.14(16)   |
| O3–S1–O4–Na1 <sup>#2</sup>                 | 3.58(7)              | C2–C1–C6–C5                   | –0.7(3)     |
| C10–S1–O4–Na1 <sup>#2</sup>                | 118.90(6)            | N1–C1–C6–C5                   | 178.81(15)  |
| O3–S1–O5–Na1                               | –66.37(14)           | C2–C1–C6–O1                   | –179.54(15) |
| O4–S1–O5–Na1                               | 60.82(15)            | N1–C1–C6–O1                   | –0.07(18)   |
| C10–S1–O5–Na1                              | 177.33(12)           | C1–N1–C7–O1                   | –0.38(18)   |
| Na1 <sup>#2</sup> –S1–O5–Na1               | –9.92(17)            | C1–N1–C7–C8                   | –179.61(15) |
| O10–S2–O8–Na1                              | 59.46(11)            | C6–O1–C7–N1                   | 0.34(18)    |
| O9–S2–O8–Na1                               | –69.10(10)           | C6–O1–C7–C8                   | 179.64(13)  |
| C23–S2–O8–Na1                              | 175.52(8)            | N1–C7–C8–C9                   | –177.49(15) |
| Na1 <sup>#4</sup> –S2–O8–Na1               | –40.60(14)           | O1–C7–C8–C9                   | 3.3(2)      |
| O10–S2–O9–Na1 <sup>#4</sup>                | 25.92(10)            | N1–C7–C8–C13                  | 4.0(3)      |
| O8–S2–O9–Na1 <sup>#4</sup>                 | 154.53(7)            | O1–C7–C8–C13                  | –175.22(14) |
| C23–S2–O9–Na1 <sup>#4</sup>                | –90.89(8)            | C13–C8–C9–C10                 | 1.0(2)      |
| O8–S2–O10–Na2                              | –175.87(16)          | C7–C8–C9–C10                  | –177.57(14) |
| O9–S2–O10–Na2                              | –47.8(2)             | C8–C9–C10–C11                 | 0.5(2)      |
| C23–S2–O10–Na2                             | 68.91(19)            | C8–C9–C10–S1                  | 178.14(12)  |
|                                            |                      | O5–S1–C10–C9                  | 15.53(14)   |
|                                            |                      | O3–S1–C10–C9                  | –105.55(13) |

|                               |             |                               |             |
|-------------------------------|-------------|-------------------------------|-------------|
| O4-S1-C10-C9                  | 136.35(12)  | O9-S2-C23-C24                 | -52.17(14)  |
| Na1 <sup>#2</sup> -S1-C10-C9  | -157.94(10) | Na1 <sup>#4</sup> -S2-C23-C24 | -92.94(13)  |
| O5-S1-C10-C11                 | -166.88(13) | C22-C23-C24-C25               | 0.4(2)      |
| O3-S1-C10-C11                 | 72.04(14)   | S2-C23-C24-C25                | -177.30(12) |
| O4-S1-C10-C11                 | -46.06(14)  | C23-C24-C25-C26               | 0.4(2)      |
| Na1 <sup>#2</sup> -S1-C10-C11 | 19.65(15)   | C24-C25-C26-O7                | -179.85(15) |
| C9-C10-C11-C12                | -1.5(2)     | C24-C25-C26-C21               | -0.3(2)     |
| S1-C10-C11-C12                | -179.09(12) | C22-C21-C26-O7                | 178.92(14)  |
| C10-C11-C12-C13               | 1.0(2)      | C20-C21-C26-O7                | -0.8(2)     |
| C11-C12-C13-O2                | 179.97(15)  | C22-C21-C26-C25               | -0.6(2)     |
| C11-C12-C13-C8                | 0.5(2)      | C20-C21-C26-C25               | 179.72(15)  |
| C9-C8-C13-O2                  | 179.08(15)  |                               |             |
| C7-C8-C13-O2                  | -2.4(2)     |                               |             |
| C9-C8-C13-C12                 | -1.5(2)     |                               |             |
| C7-C8-C13-C12                 | 177.07(15)  |                               |             |
| C20-N2-C14-C19                | -0.30(18)   |                               |             |
| C20-N2-C14-C15                | 179.11(18)  |                               |             |
| C19-C14-C15-C16               | -0.5(3)     |                               |             |
| N2-C14-C15-C16                | -179.83(17) |                               |             |
| C14-C15-C16-C17               | -0.1(3)     |                               |             |
| C15-C16-C17-C18               | 0.3(3)      |                               |             |
| C16-C17-C18-C19               | 0.0(3)      |                               |             |
| C15-C14-C19-O6                | -178.96(15) |                               |             |
| N2-C14-C19-O6                 | 0.53(18)    |                               |             |
| C15-C14-C19-C18               | 0.8(3)      |                               |             |
| N2-C14-C19-C18                | -179.70(15) |                               |             |
| C20-O6-C19-C14                | -0.52(16)   |                               |             |
| C20-O6-C19-C18                | 179.71(16)  |                               |             |
| C17-C18-C19-C14               | -0.5(3)     |                               |             |
| C17-C18-C19-O6                | 179.21(15)  |                               |             |
| C14-N2-C20-O6                 | -0.04(18)   |                               |             |
| C14-N2-C20-C21                | -179.10(15) |                               |             |
| C19-O6-C20-N2                 | 0.36(18)    |                               |             |
| C19-O6-C20-C21                | 179.49(14)  |                               |             |
| N2-C20-C21-C22                | 176.85(15)  |                               |             |
| O6-C20-C21-C22                | -2.2(2)     |                               |             |
| N2-C20-C21-C26                | -3.5(2)     |                               |             |
| O6-C20-C21-C26                | 177.50(14)  |                               |             |
| C26-C21-C22-C23               | 1.4(2)      |                               |             |
| C20-C21-C22-C23               | -178.95(14) |                               |             |
| C21-C22-C23-C24               | -1.3(2)     |                               |             |
| C21-C22-C23-S2                | 176.40(12)  |                               |             |
| O10-S2-C23-C22                | 9.34(15)    |                               |             |
| O8-S2-C23-C22                 | -110.91(13) |                               |             |
| O9-S2-C23-C22                 | 130.16(13)  |                               |             |
| Na1 <sup>#4</sup> -S2-C23-C22 | 89.39(12)   |                               |             |
| O10-S2-C23-C24                | -172.99(12) |                               |             |
| O8-S2-C23-C24                 | 66.76(14)   |                               |             |

Symmetry transformations used to generate equivalent atoms:  
#1: +X, 0.5-Y, 0.5+Z; #2: 1-X, 1-Y, 2-Z; #3: 1-X, 0.5+Y, 1.5-Z; #4: 1-X,  
-0.5+Y, 1.5-Z;

#### 14. References:

- [1] a) Y. Li, X. Zhang, B. Zhu, J. Yan and W. Xu, *Analytical Sciences*, 2010, **26**, 1077; (b) Q. Mei, Y. Shi, Q. Hua and Bihai Tong *RSC Adv.*, 2015, **5**, 74924-74931
- [2] Bruker, *SAINT, V8.40B*, Bruker AXS Inc., Madison, Wisconsin, USA.
- [3] L. Krause, R. Herbst-Irmer, G. M. Sheldrick and D. Stalke, *J. Appl. Cryst.*, 2015, **48**, 3–10.
- [4] G. M. Sheldrick, *Acta Cryst.*, 2015, **A71**, 3–8, doi:10.1107/S2053273314026370.
- [5] G. M. Sheldrick, *Acta Cryst.*, 2015, **C71**, 3–8, doi:10.1107/S2053229614024218.
- [6] D. Kratzert, J. J. Holstein and I. Krossing, *J. Appl. Cryst.*, 2015, **48**, 933–938.
- [7] D. Kratzert and I. Krossing, *J. Appl. Cryst.*, 2018, **51**, 928–934.
- [8] C. R. Groom, I. J. Bruno, M. P. Lightfoot and S. C. Ward, *Acta Cryst.*, 2016, **B72**, 171–179.
- [9] D. Kratzert, *FinalCif, V137*, <https://dkratzert.de/finalcif.html>.

<sup>1</sup>H-NMR of **1**

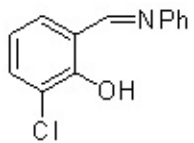

**1**

8.616  
7.485  
7.479  
7.458  
7.452  
7.425  
7.351  
7.347  
7.337  
7.332  
7.326  
7.319  
7.313  
7.306  
7.297  
7.290  
7.287  
6.919  
6.893  
6.867

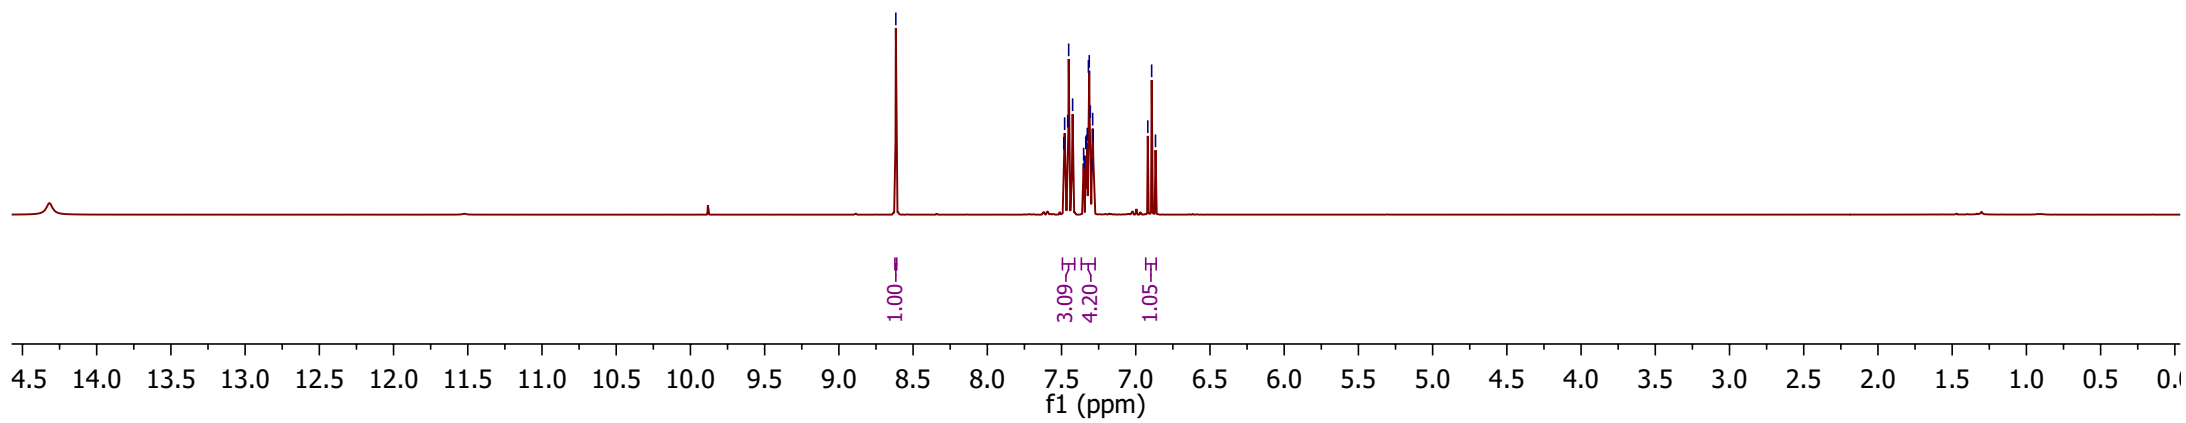

<sup>13</sup>C-NMR of **1**

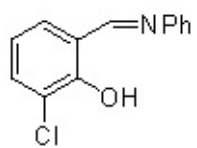

**1**

—161.81  
—157.45  
—147.61  
—133.45  
—130.81  
—129.76  
—127.68  
—122.13  
—121.39  
—120.20  
—119.36

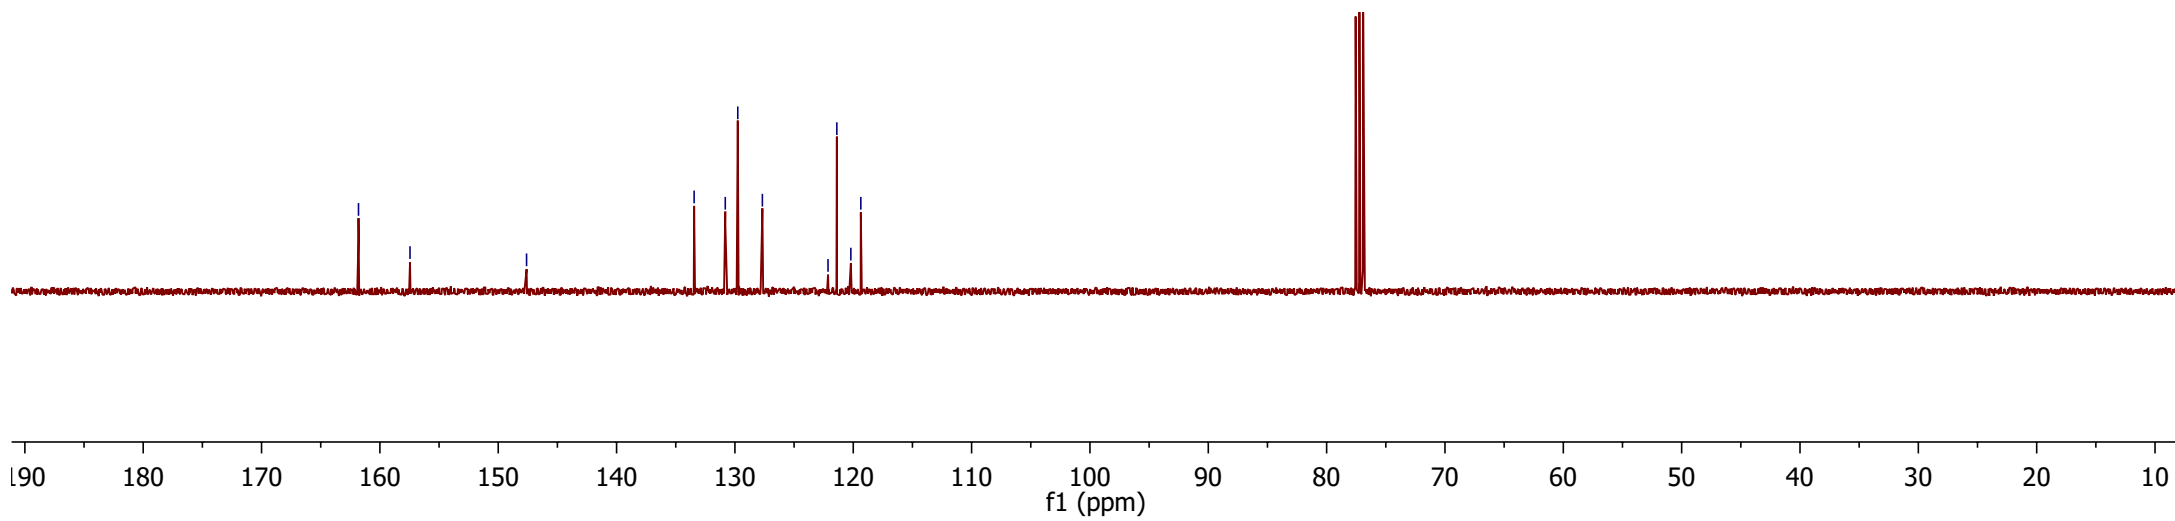



<sup>1</sup>H-NMR of **3**

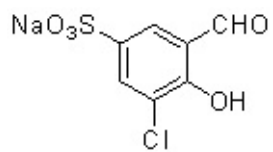

**3**

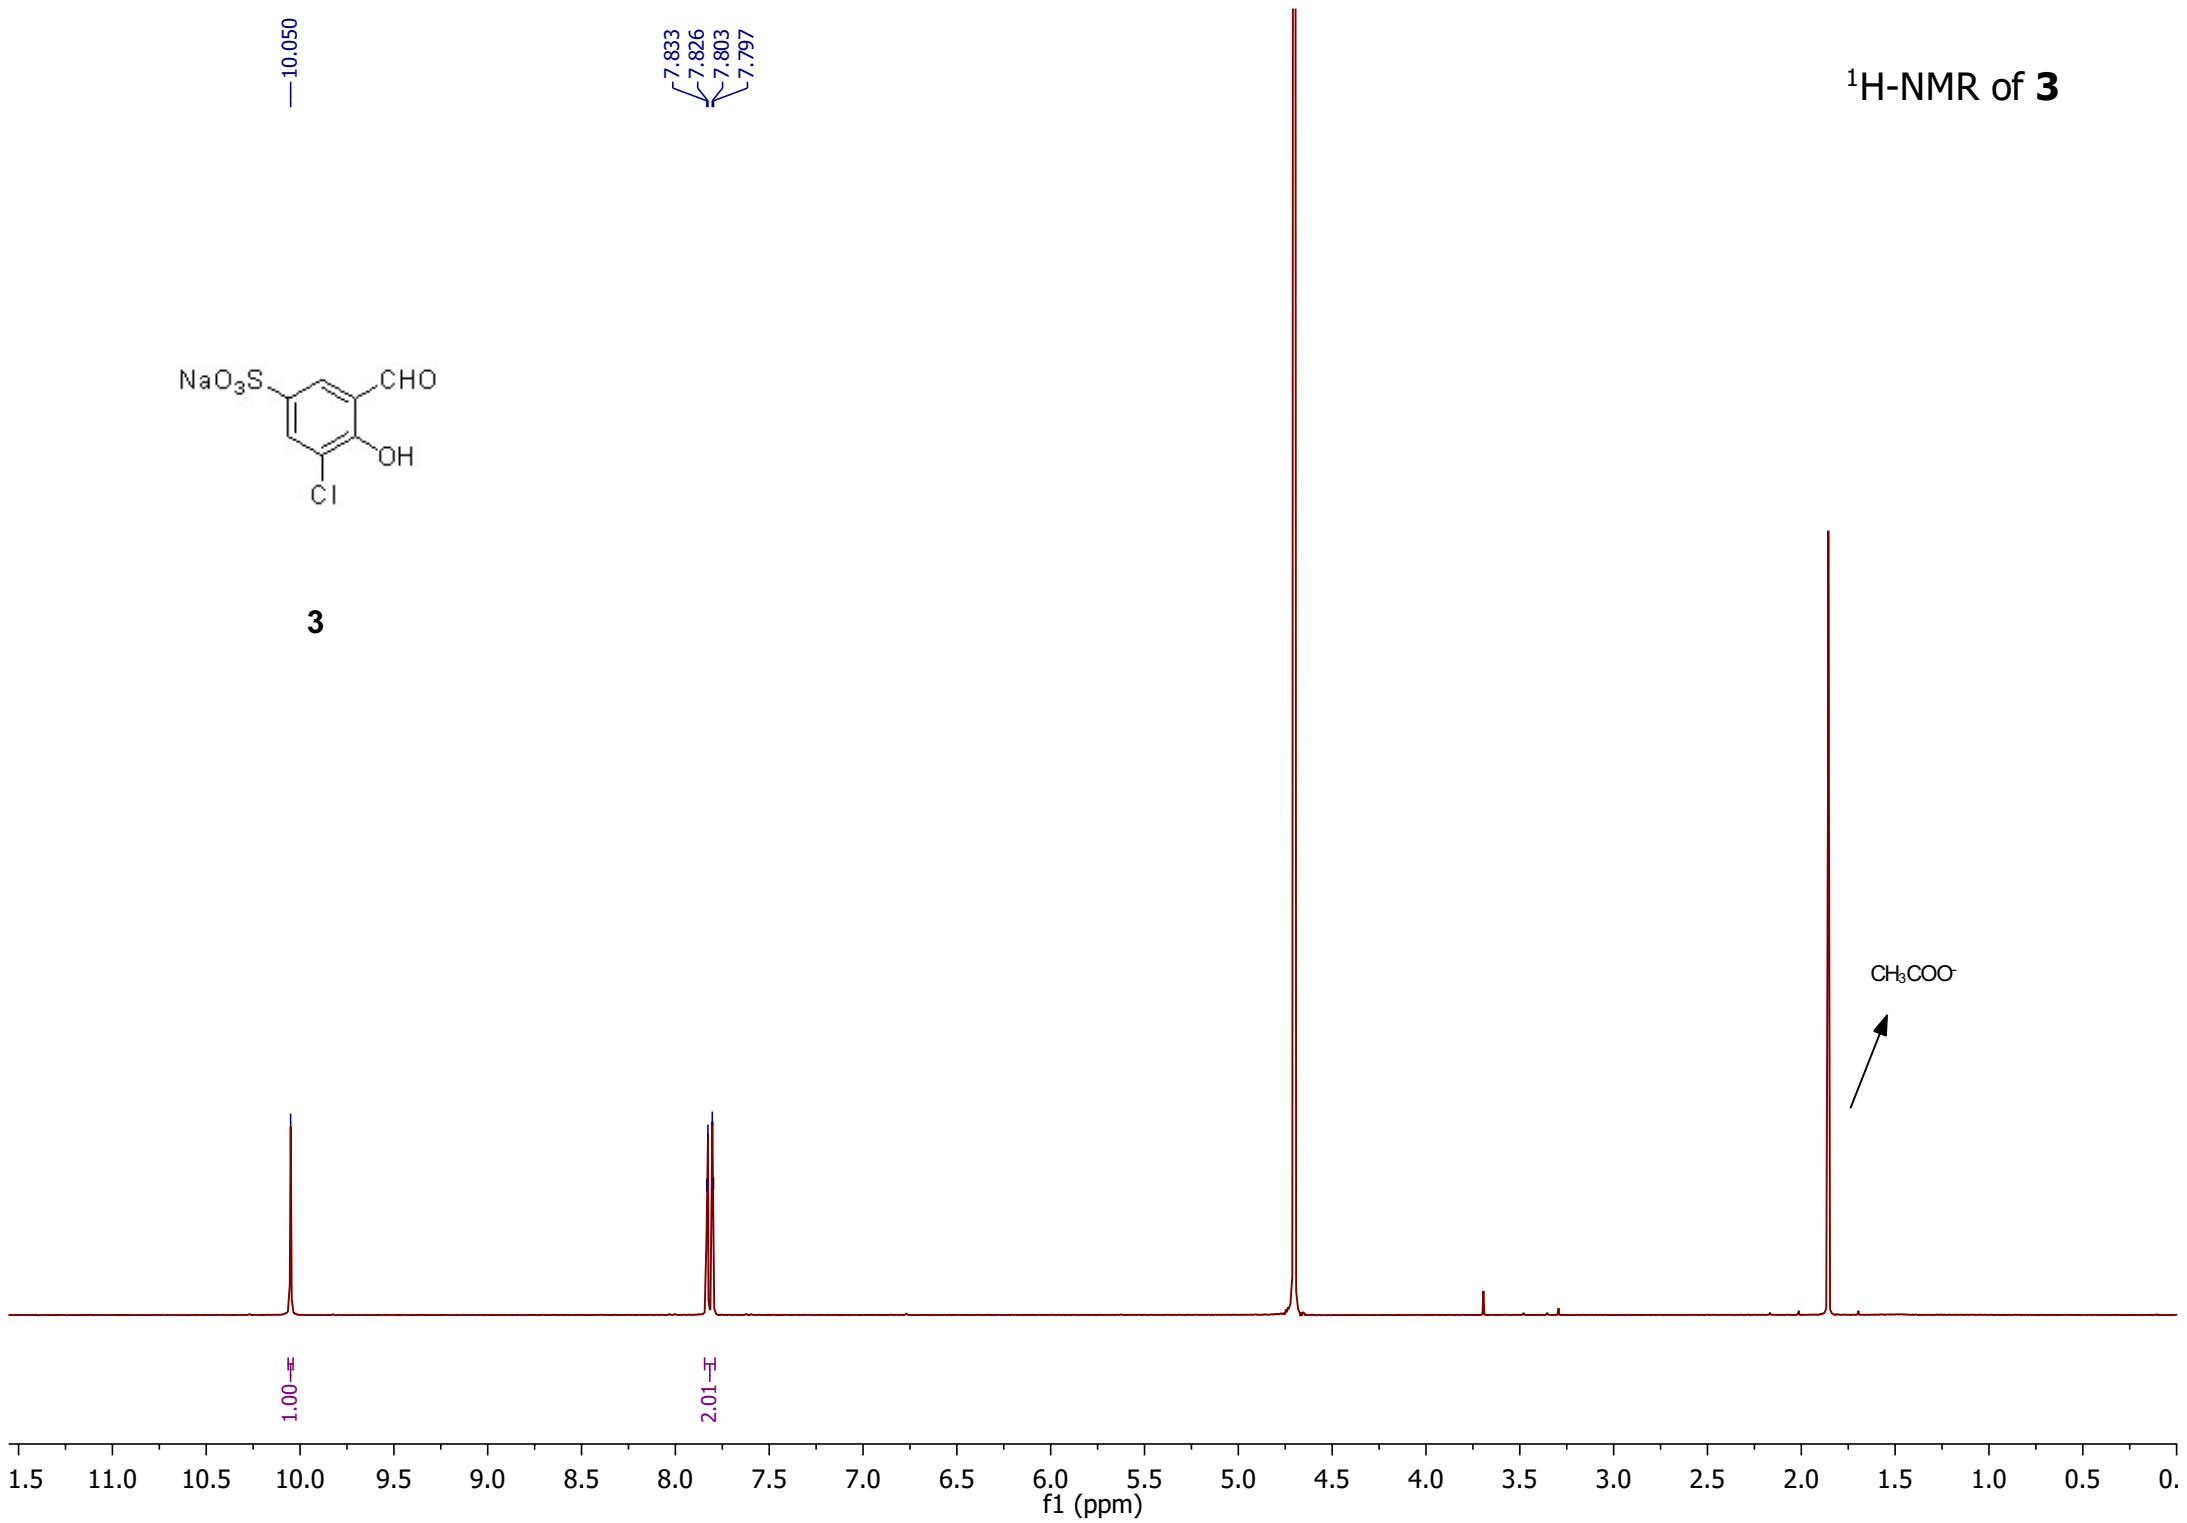

<sup>13</sup>C-NMR of **3**

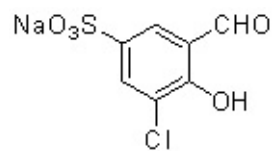

**3**

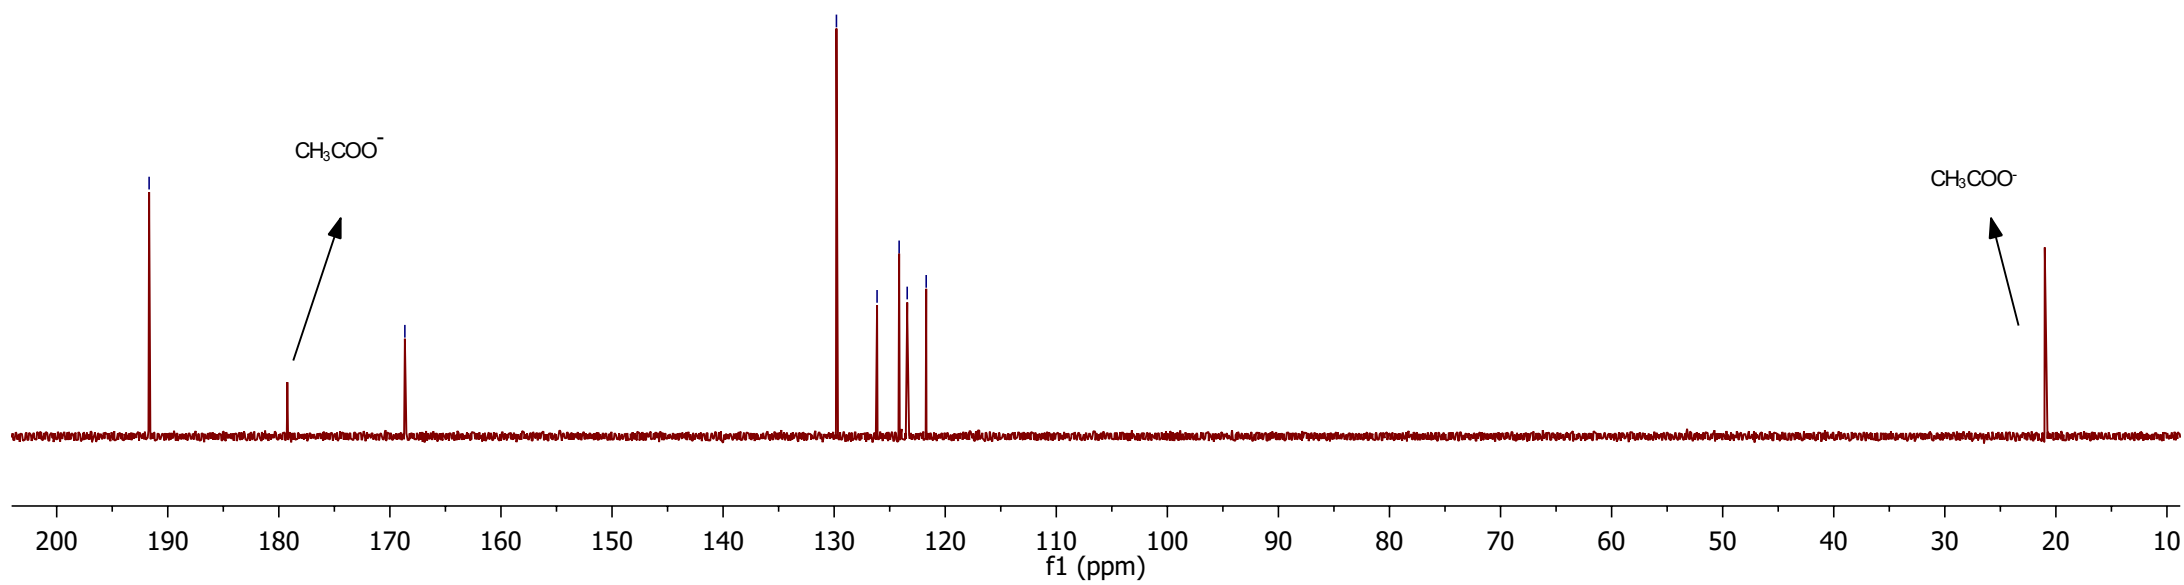

— 11.987

<sup>1</sup>H-NMR of **4**

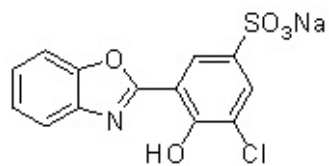

**4**

8.242  
8.237  
7.935  
7.931  
7.922  
7.916  
7.911  
7.903  
7.899  
7.800  
7.795  
7.562  
7.559  
7.544  
7.540  
7.525  
7.521  
7.507  
7.503  
7.488  
7.484

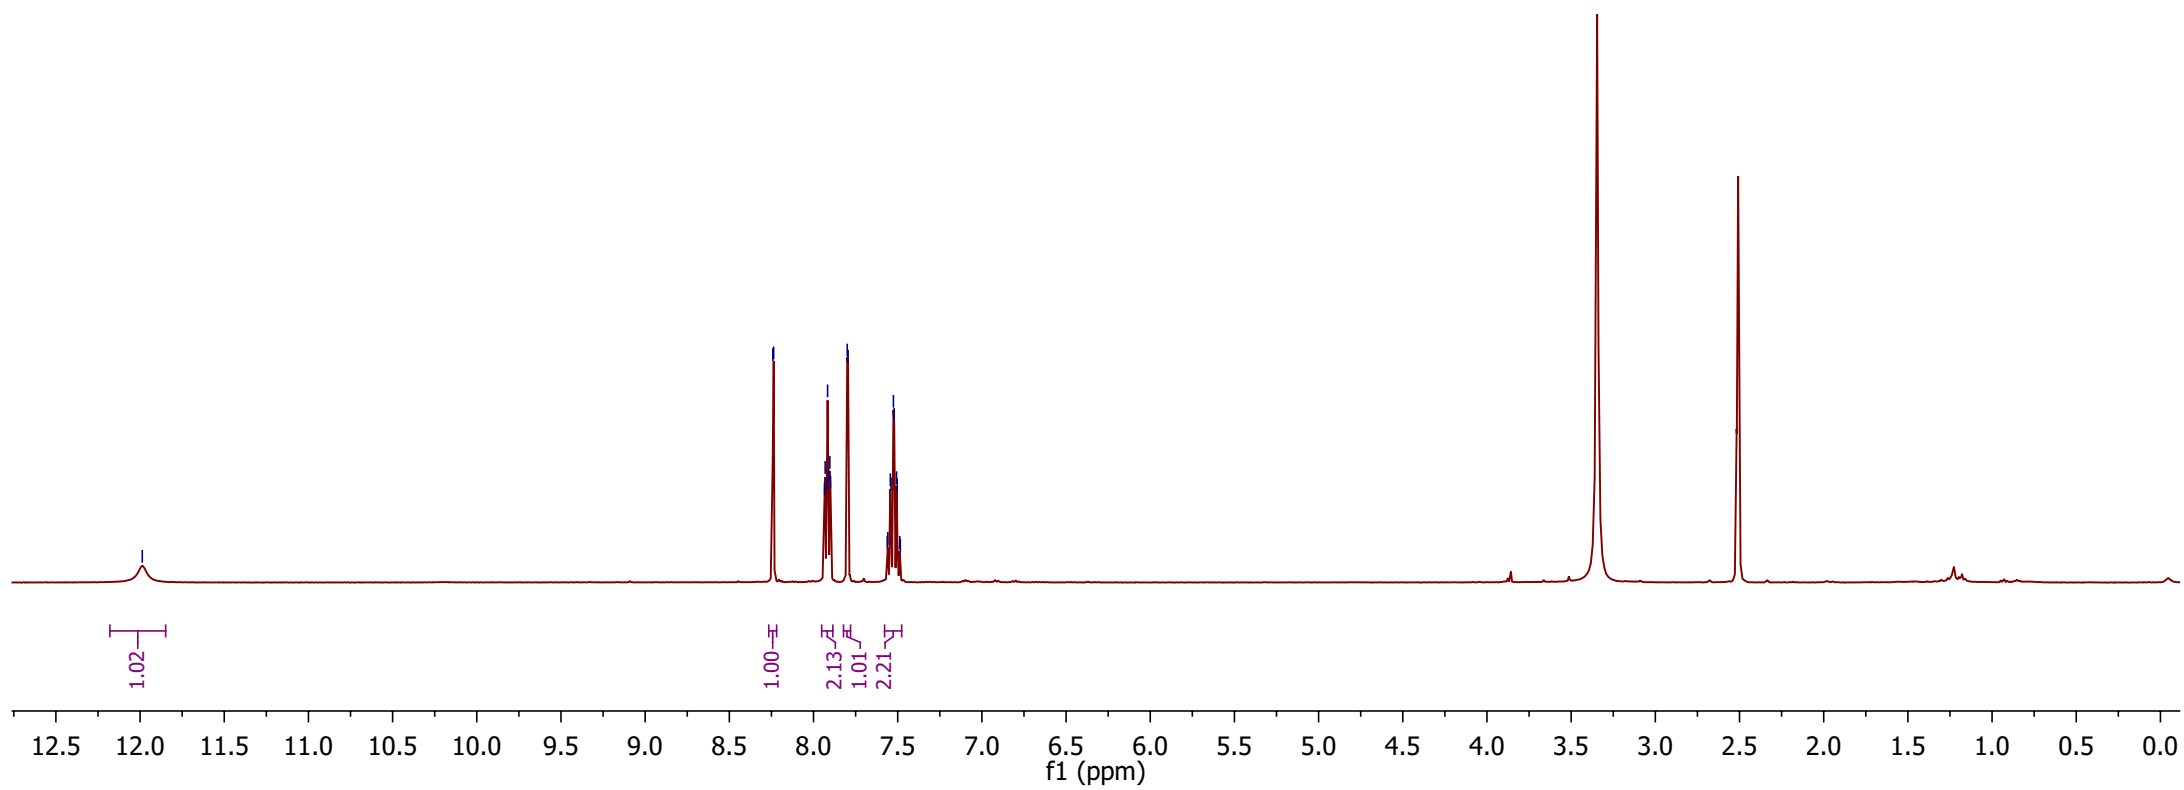

<sup>13</sup>C-NMR of **4**

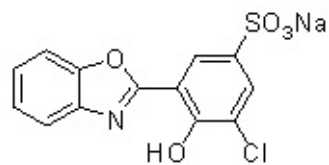

**4**

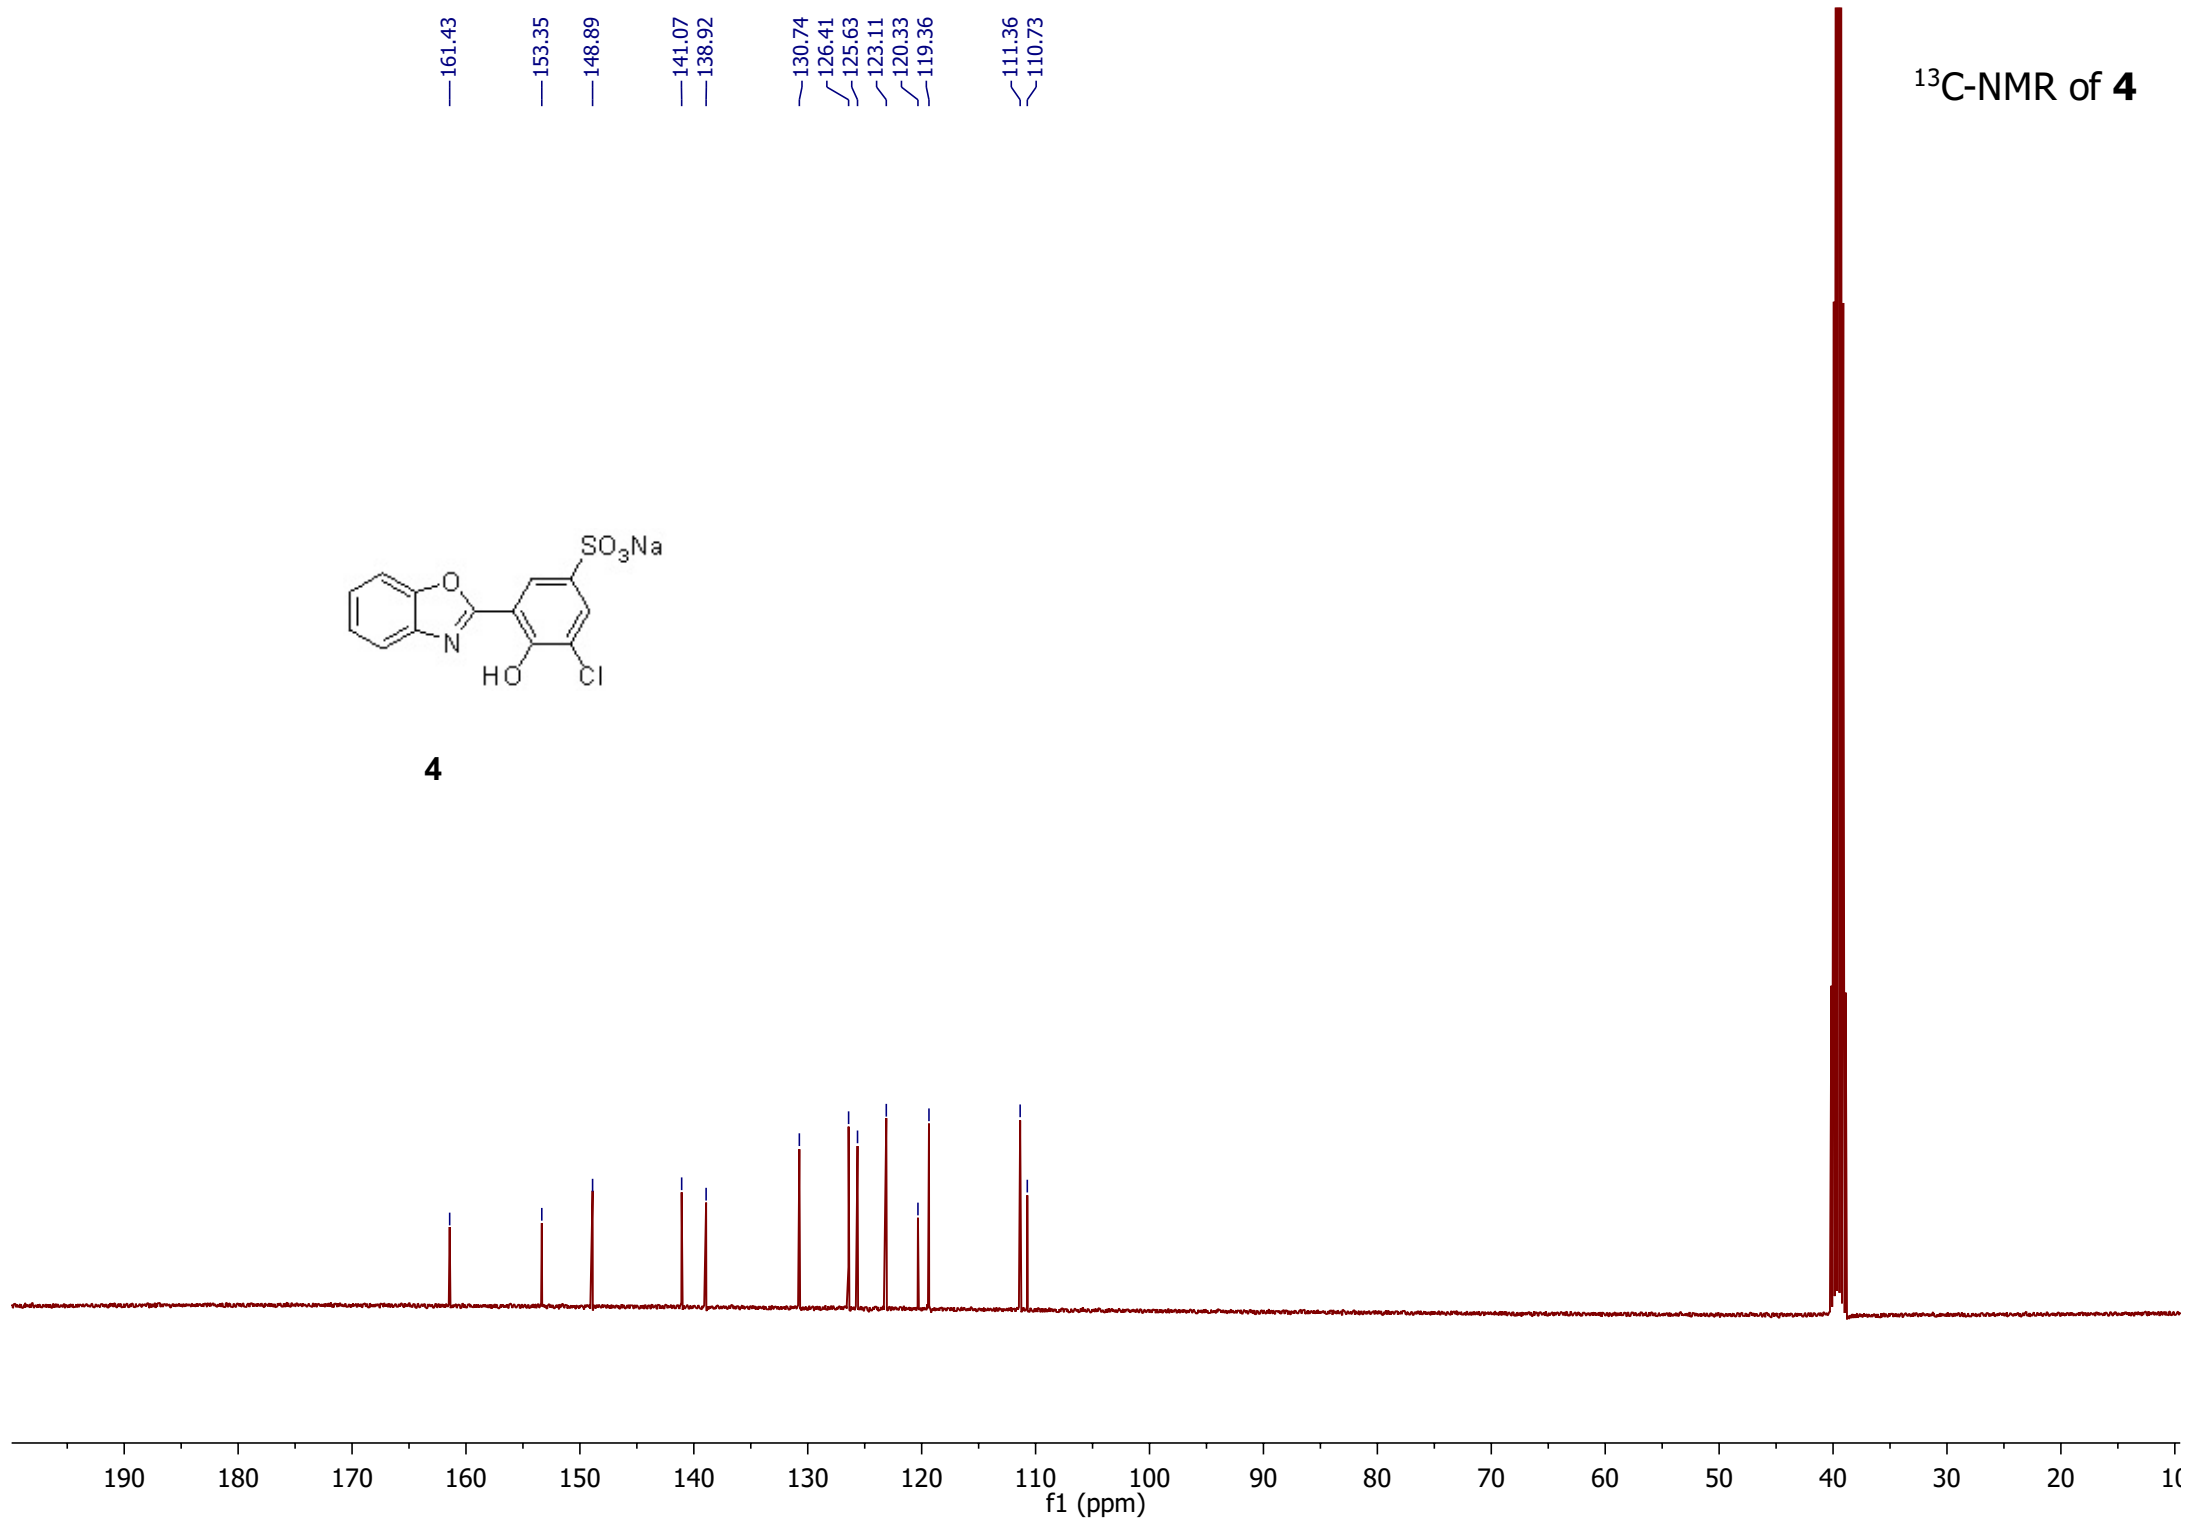

<sup>1</sup>H-NMR of **5**

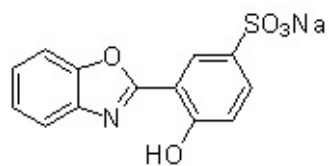

**5**

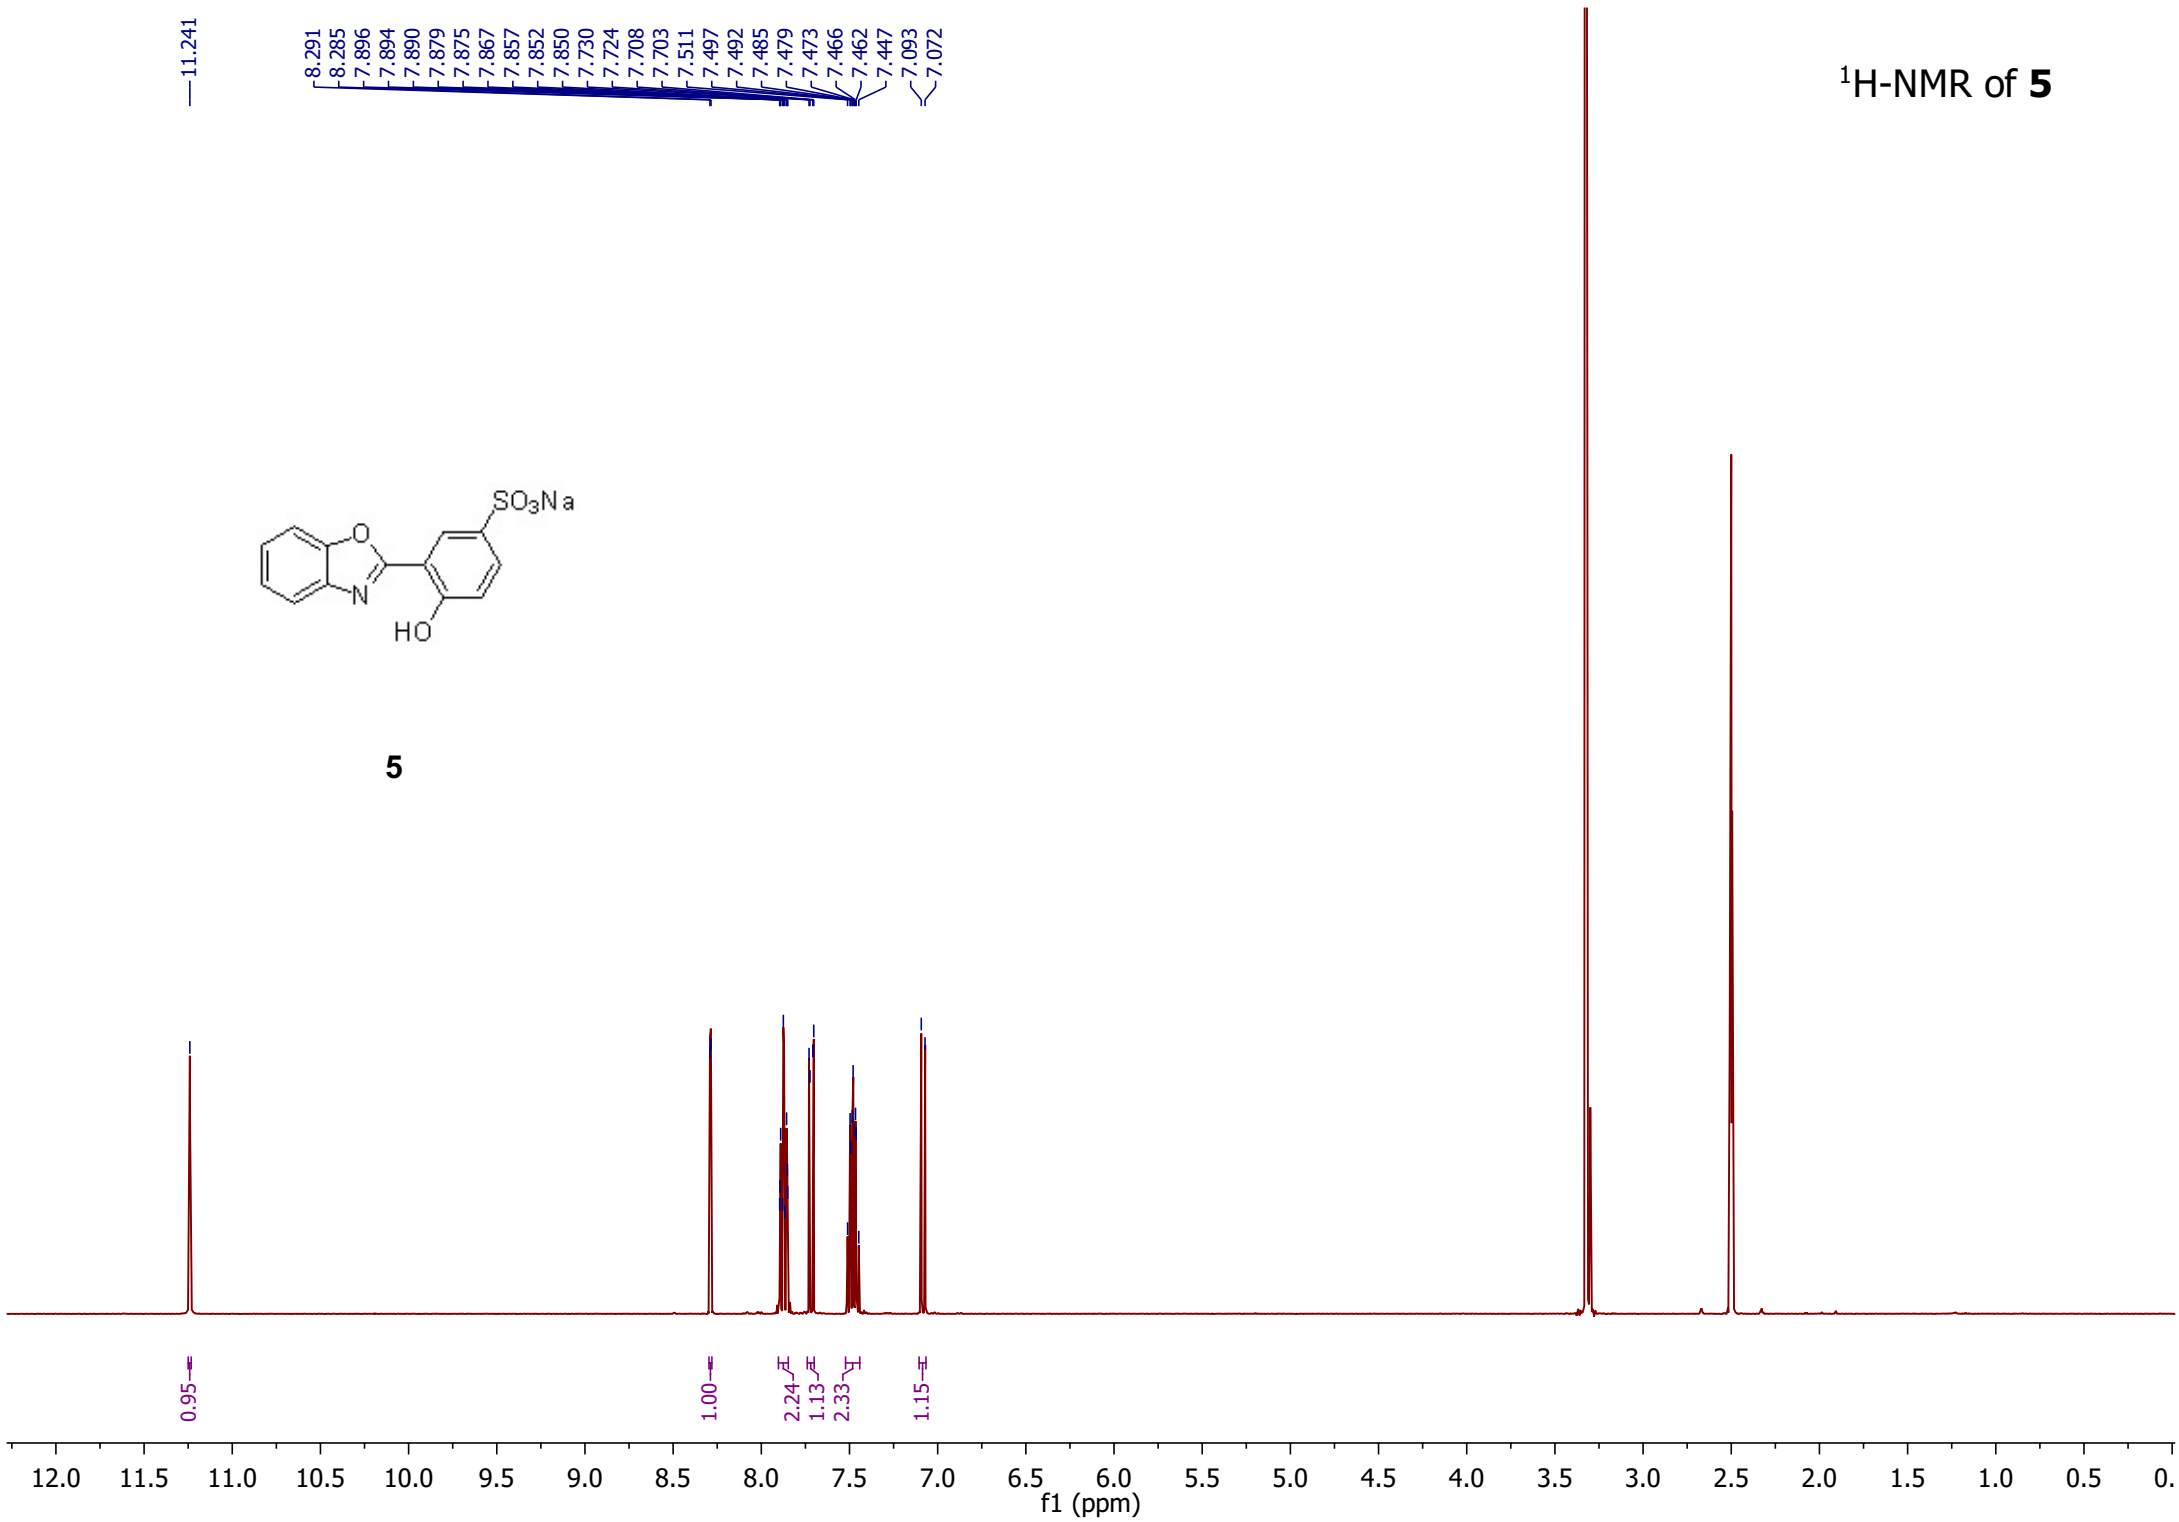

<sup>13</sup>C-NMR of **5**

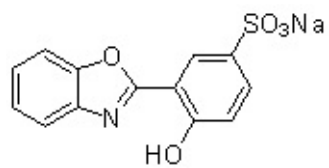

**5**

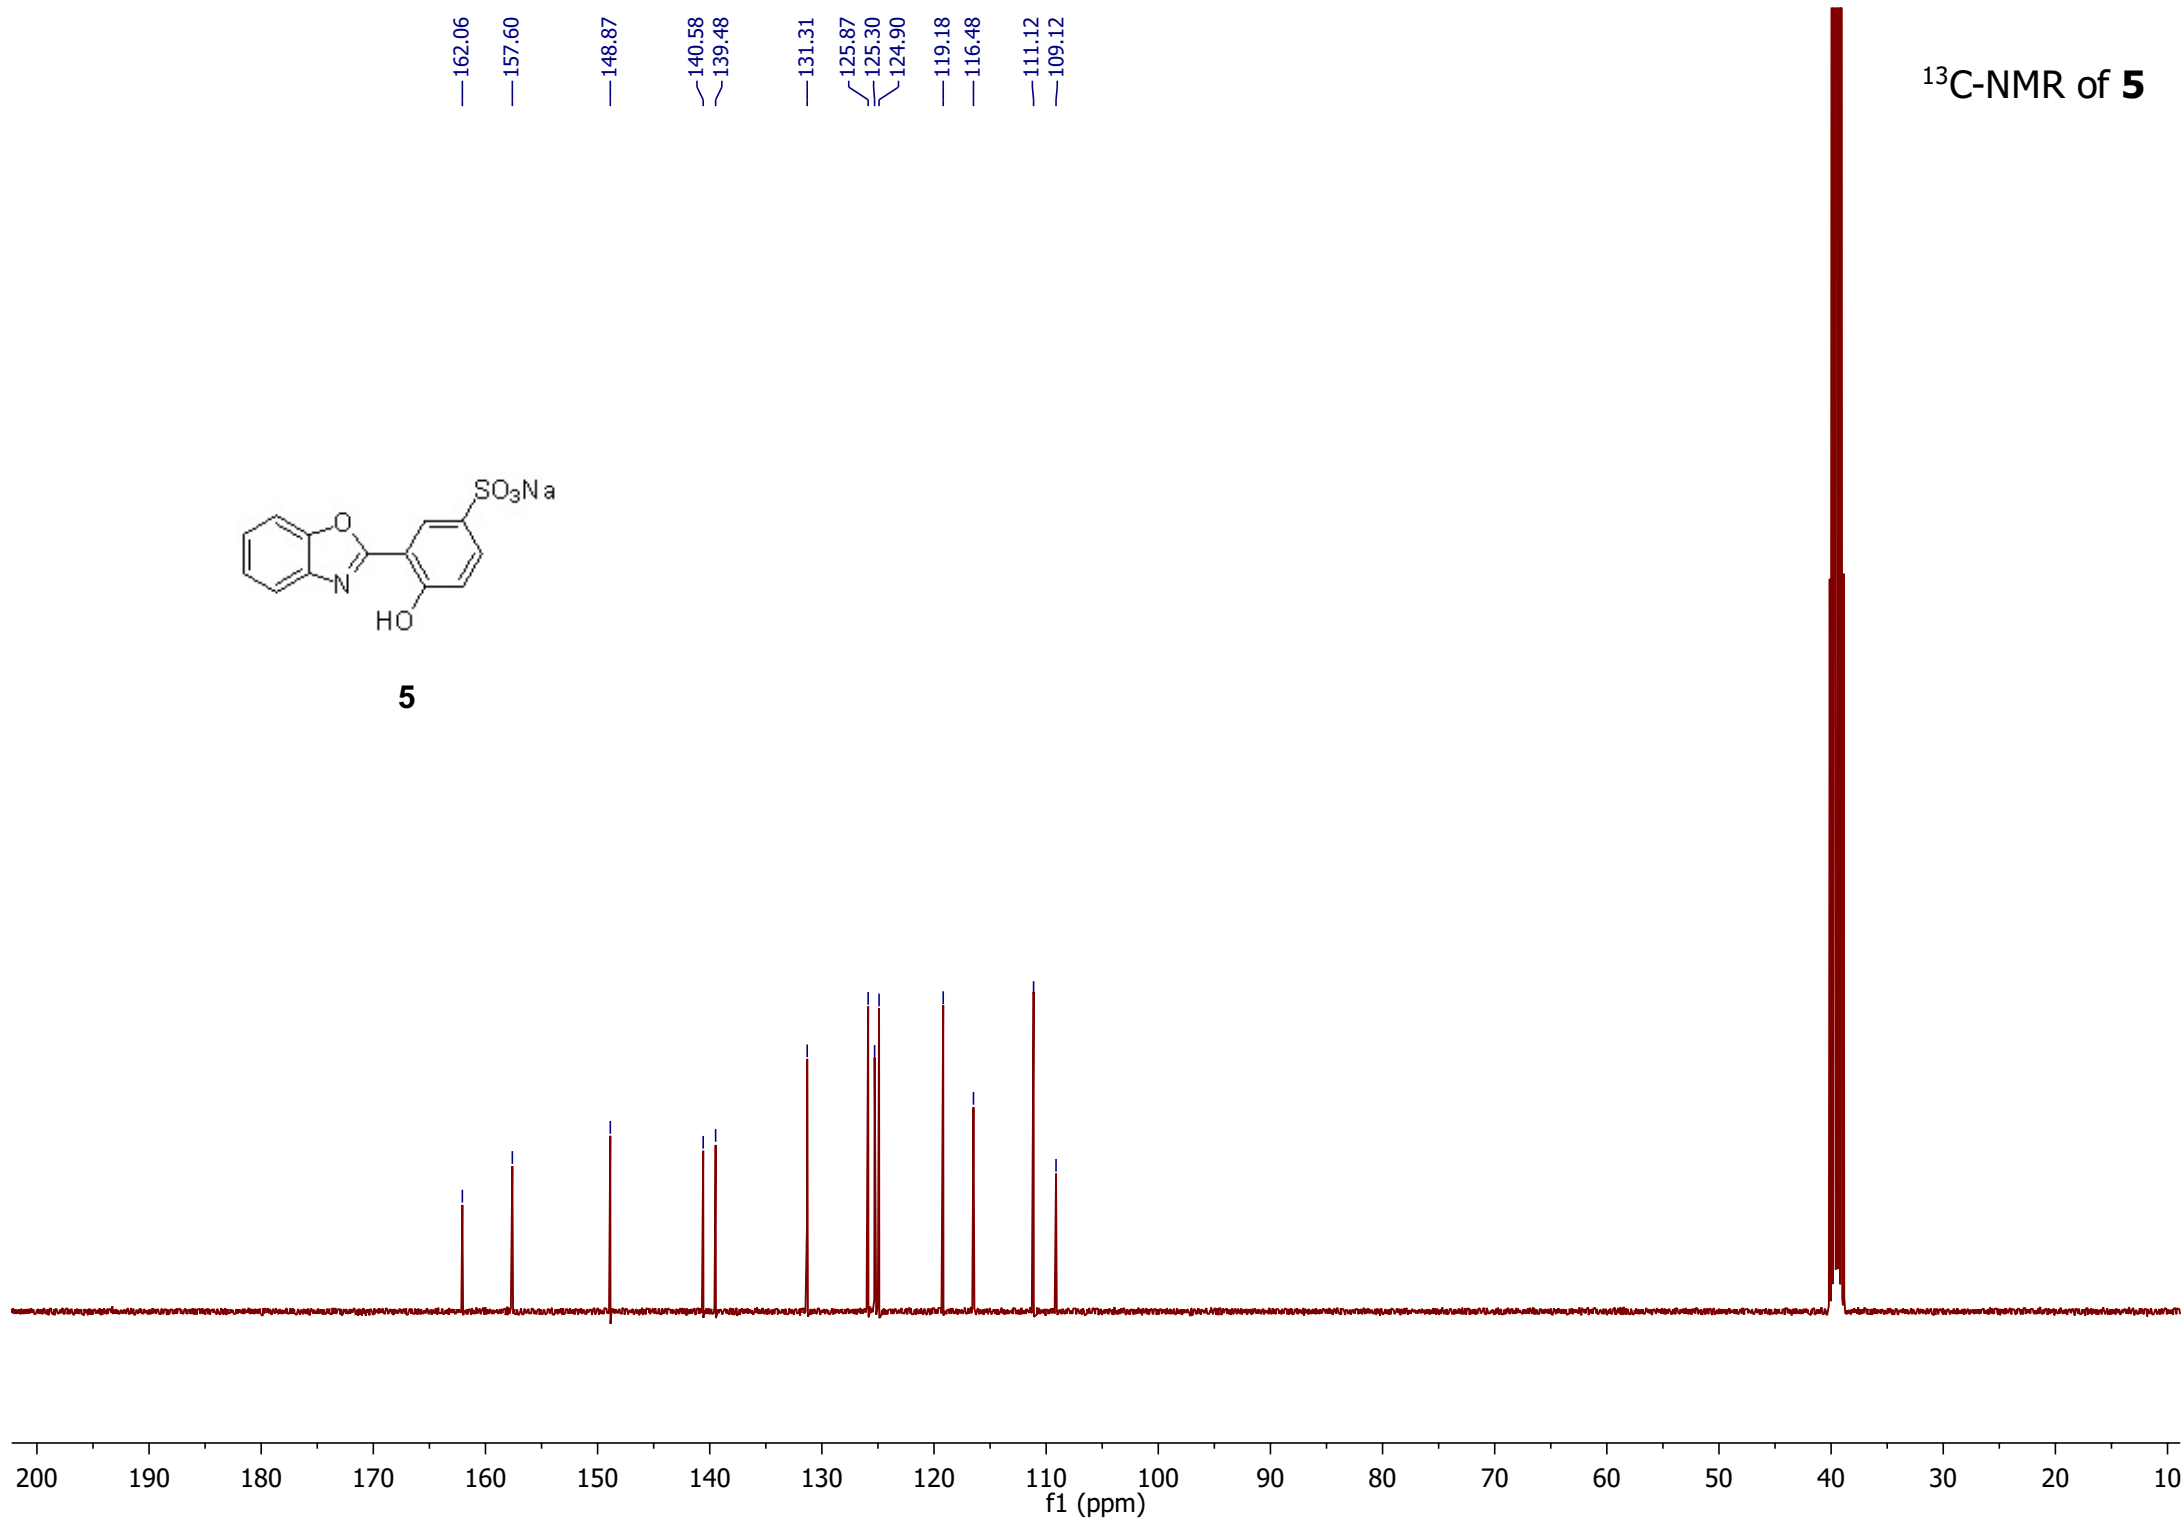

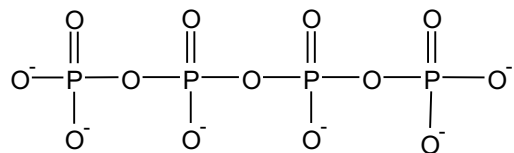

ammonium salt

**polyP4**

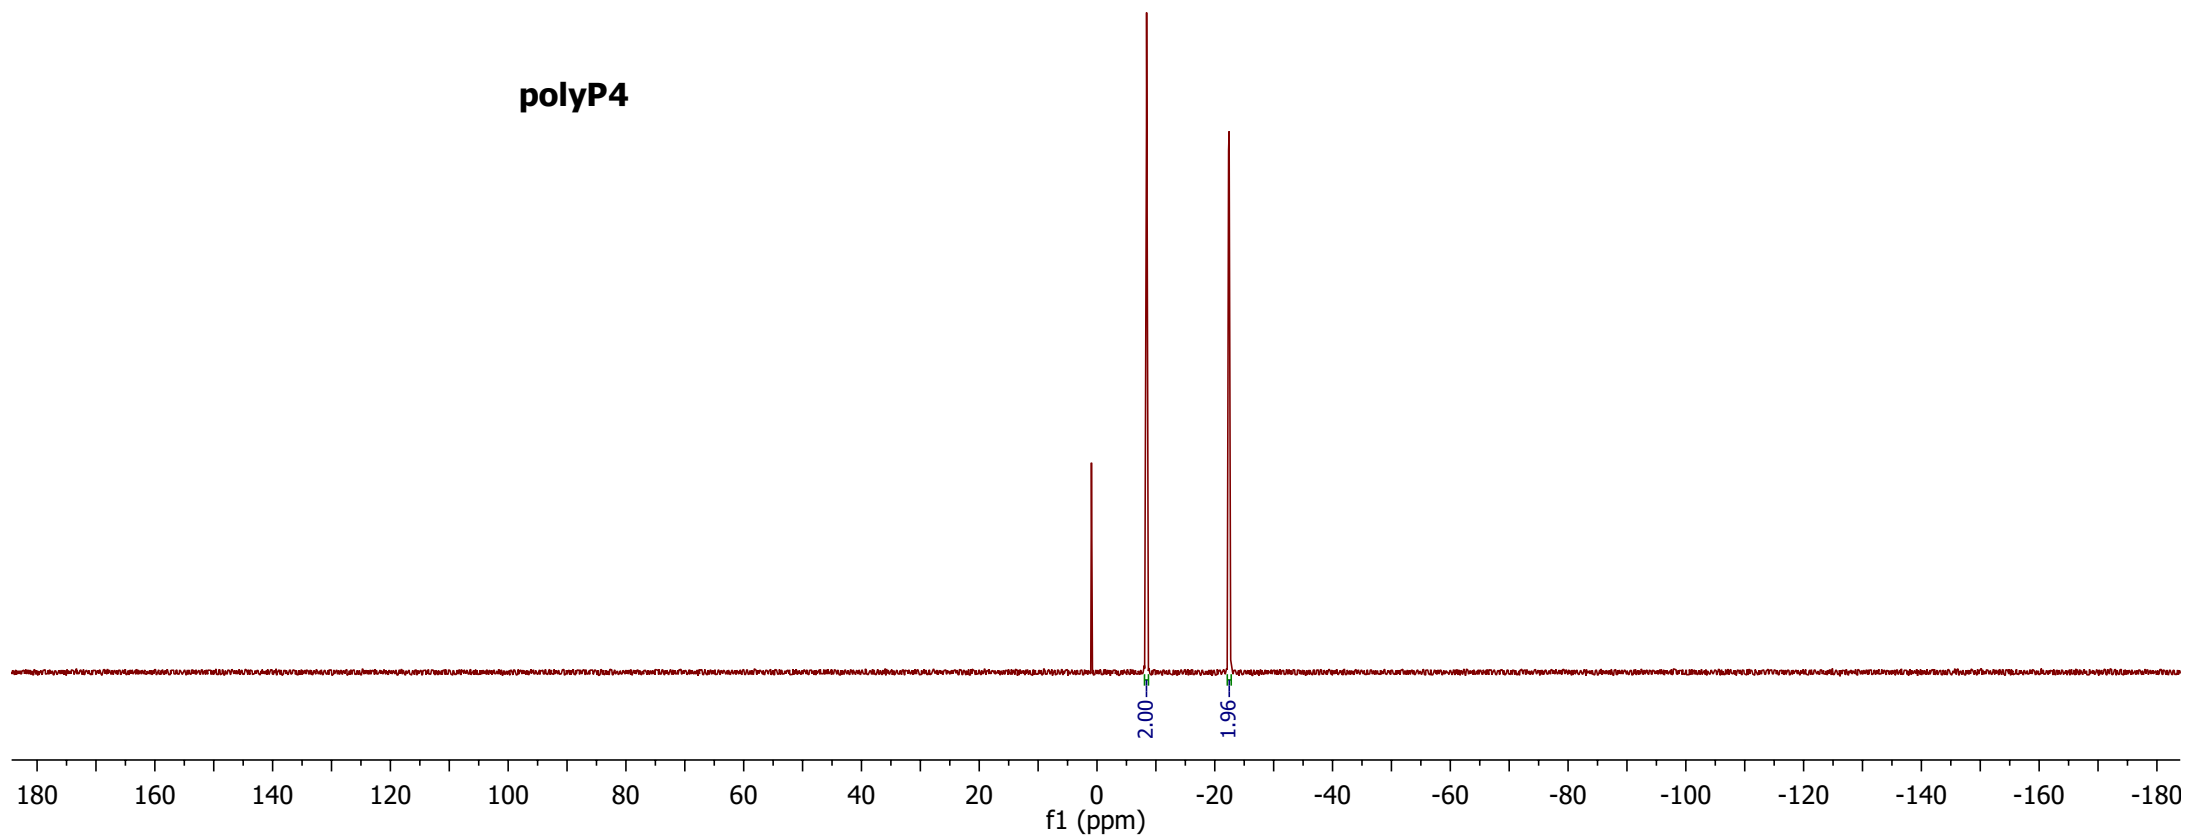







## HRMS Spectra:

HRMS spectrum of **1**:

rojeb41shr1 #1 RT: 0.02 AV: 1 NL: 6.05E6  
T: FTMS + p ESI Full lock ms [100.00-700.00]

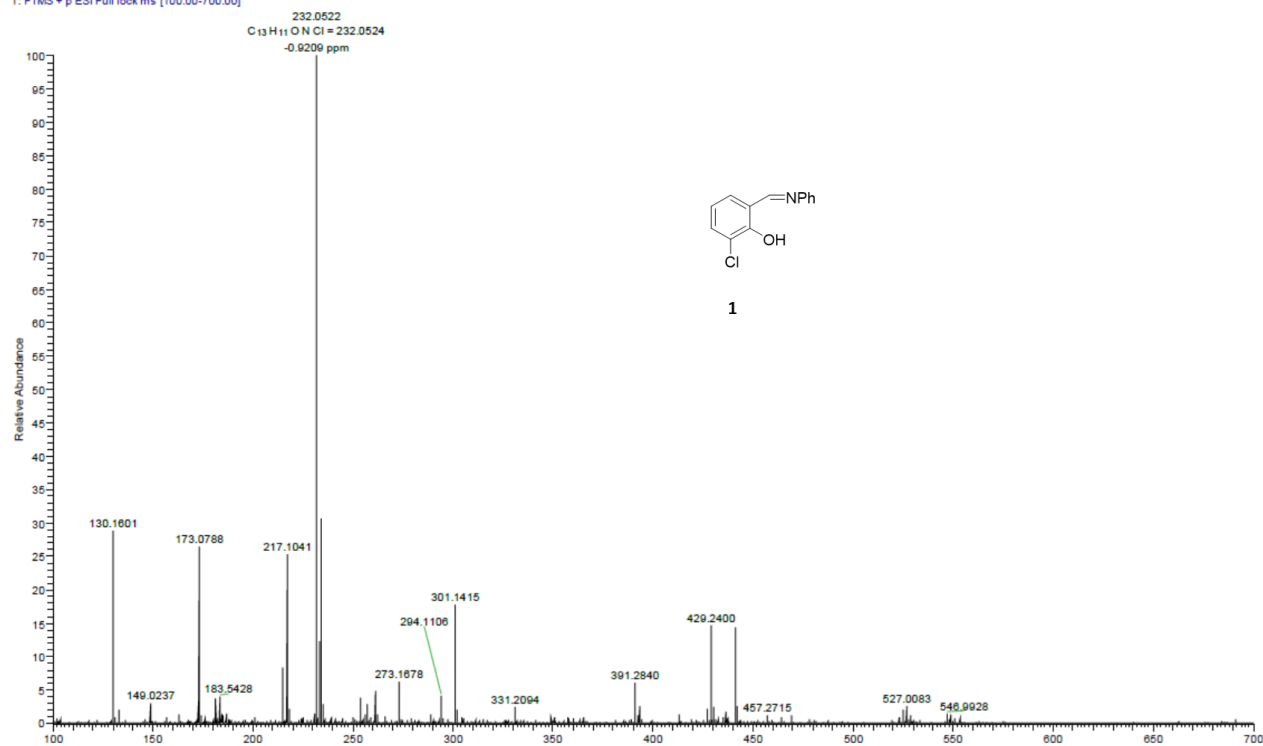

HRMS spectrum of **3**:

rojeb99shr3 #1 RT: 0.02 AV: 1 NL: 1.44E7  
T: FTMS - p ESI Full lock ms [100.00-1200.00]

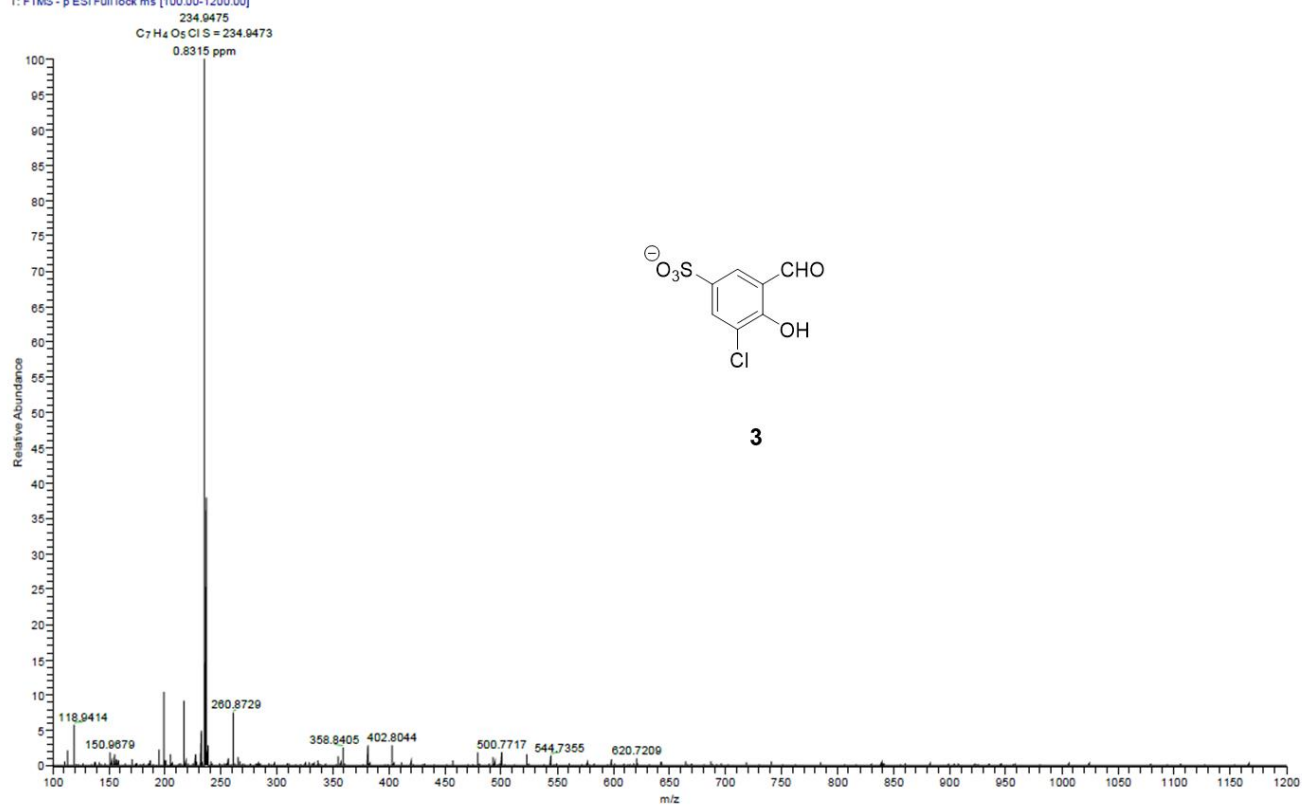

## HRMS spectrum of 4:

rojec11shr1 #1 RT: 0.02 AV: 1 NL: 1.90E7  
T: FTMS - p ESI Full lock ms [100.00-1000.00]

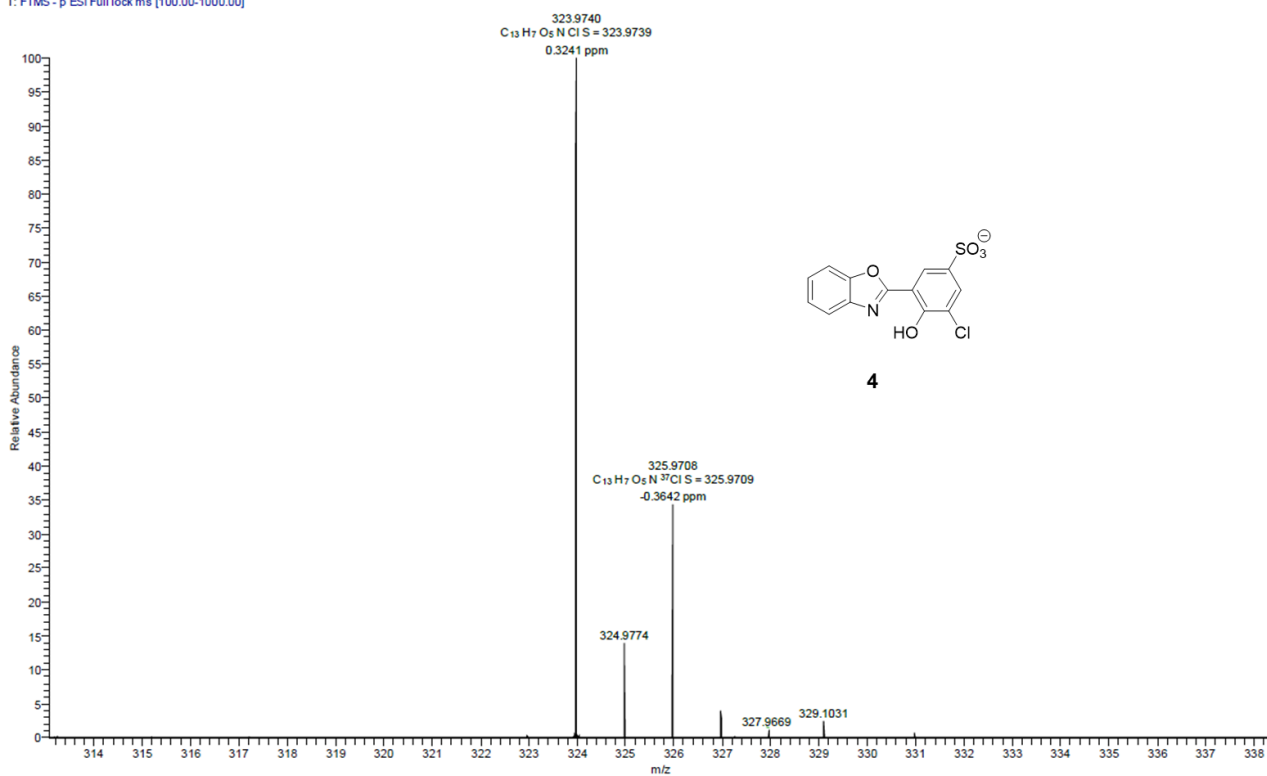

## HRMS spectrum of 5:

rojec17shr1 #1 RT: 0.02 AV: 1 NL: 4.48E8  
T: FTMS - p ESI Full lock ms [100.00-1000.00]

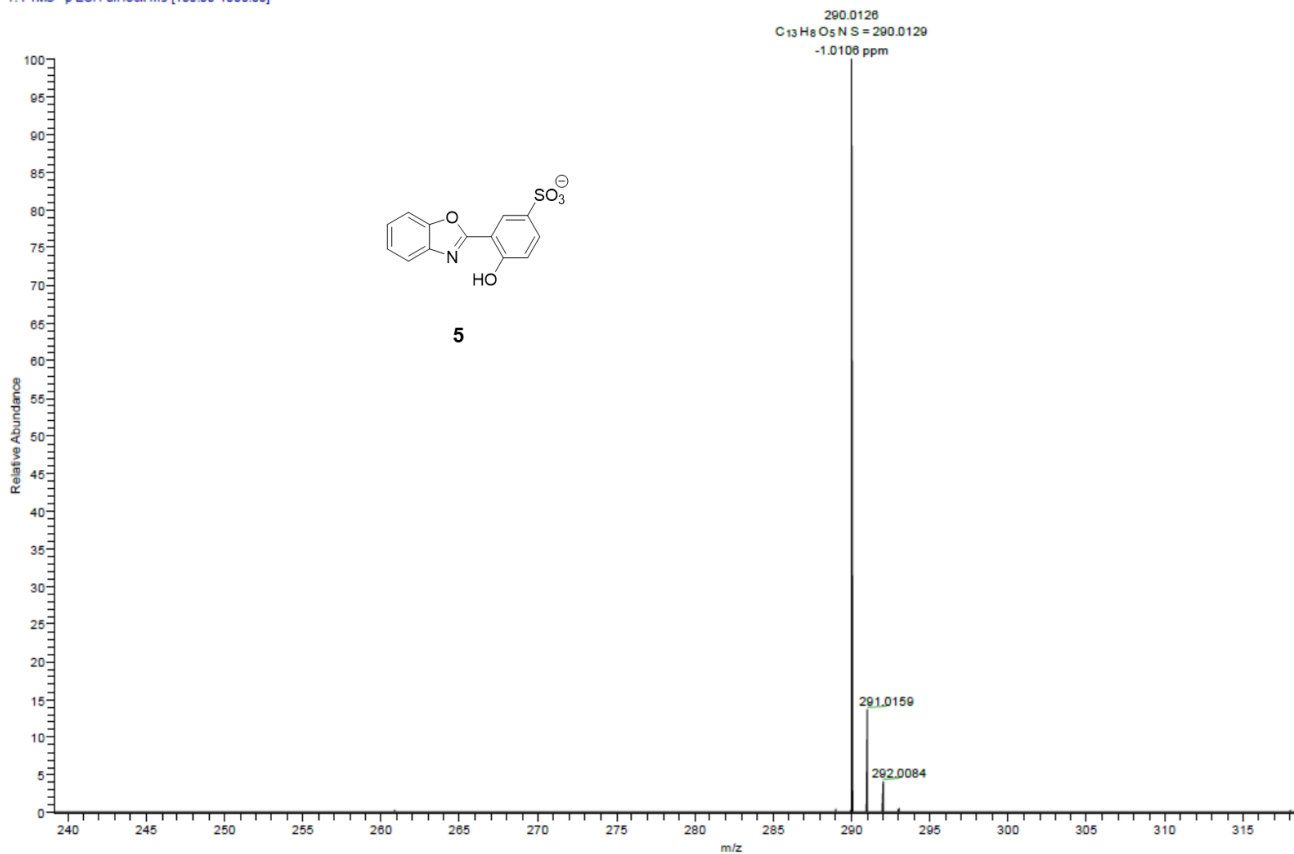

Supplement: OB-OLF-D4OB01926A-s001.pdf [file OB-OLF-D4OB01926A-s001.pdf]
